1 **Full Title:** Evolution of abbreviated development in *Heliocidaris erythrogramma*  
2 dramatically re-wired the highly conserved sea urchin developmental gene regulatory  
3 network to decouple signaling center function from ultimate fate

4  
5 **Short Title:** Heliocidaris life history switch rewired early gene regulatory network

6  
7 **Authors and affiliations:**

8 **Allison Edgar**<sup>1,2</sup>, **Maria Byrne**<sup>2,3</sup>, **David R. McClay**<sup>1</sup>, **Gregory A. Wray**<sup>1,4</sup>

9 <sup>1</sup>Department of Biology, Duke University, Durham, NC, USA

10 <sup>2</sup>School of Medical Science and Bosch Institute, Department of Anatomy and Histology,  
11 The University of Sydney, Sydney, NSW, Australia

12 <sup>3</sup>School of Life and Environmental Sciences, The University of Sydney, Sydney, NSW,  
13 Australia

14 <sup>4</sup>Center for Genomic and Computational Biology, Duke University, Durham, NC 27708,  
15 USA.

16  
17 **Email addresses of corresponding authors:** Allison Edgar: ae75@duke.edu; Gregory  
18 A. Wray: gwray@duke.edu)

19  
20 **Email addresses of co-authors:**

21 Maria Byrne: mbyrne@anatomy.usyd.edu.au; David R. McClay: dmcclay@duke.edu

22

23

## 24 **Abstract**

25 Developmental gene regulatory networks (GRNs) describe the interactions among gene  
26 products that drive the differential transcriptional and cell regulatory states that pattern  
27 the embryo and specify distinct cell fates. GRNs are often deeply conserved, but  
28 whether this is the product of constraint inherent to the network structure or stabilizing  
29 selection remains unclear. We have constructed the first formal GRN for early  
30 development in *Heliocidaris erythrogramma*, a species with dramatically accelerated,  
31 direct development. This life history switch has important ecological consequences,  
32 arose rapidly, and has evolved independently many times in echinoderms, suggesting it  
33 is a product of selection. We find that *H. erythrogramma* exhibits dramatic differences in  
34 GRN topology compared with ancestral, indirect-developing sea urchins. In particular,  
35 the GRN sub-circuit that directs the early and autonomous commitment of skeletogenic  
36 cell precursors in indirect developers appears to be absent in *H. erythrogramma*, a  
37 particularly striking change in relation to both the prior conservation of this sub-circuit  
38 and the key role that these cells play ancestrally in early development as the embryonic  
39 signaling center. These results show that even highly conserved molecular mechanisms  
40 of early development can be substantially reconfigured in a relatively short evolutionary  
41 time span, suggesting that selection rather than constraint is responsible for the striking  
42 conservation of the GRN among other sea urchins.

43

## 44 **Introduction**

45 Instructions encoded in the genome are executed during development to specify distinct  
46 cell types in specific spatial patterns. Developmental gene regulatory networks (GRNs)

47 are formal models of the transcription factor cascades and cell signaling interactions  
48 that specify these diverse cell fates and distinct embryonic territories. Evolutionary  
49 changes in these processes are thought to underlie many interesting and novel  
50 phenotypes. However, two fundamental challenges to understanding how GRNs evolve  
51 are distinguishing stabilizing selection from inherent network features that promote  
52 stability and discriminating directional selection from phenotypically neutral  
53 developmental systems drift [1,2]. The sea urchin *Heliocidaris erythrogramma* is an  
54 ideal model system to explore these questions because its development has changed  
55 dramatically from the ancestral state in a relatively short evolutionary time,  
56 approximately 4 million years ago (mya). Developmental GRNs from sea urchins  
57 diverged ~40-270 mya, and from several echinoderm outgroups diverged up to 550  
58 mya, are particularly well-studied (reviewed in [3-6]). Thus evolution of echinoderm  
59 GRNs may be compared across orders of magnitude of divergence time.

60 The euechinoid genus *Heliocidaris* encompasses a dramatic shift in developmental life  
61 history [7,8]. *H. tuberculata* exhibits the ancestral condition for sea urchins: small eggs  
62 with indirect development via a feeding larva (planktotrophy). The developmental GRN  
63 underlying this ancestral life history (Figure 1A) has been characterized in considerable  
64 detail and is highly conserved across euechinoid sea urchins [6,9]. *H. erythrogramma*'s  
65 ancestors diverged from the ancestral condition, acquiring much larger eggs and greatly  
66 accelerated development via a nonfeeding larva (lecithotrophy) with highly derived  
67 morphology [8,10,11] (Figure 1B). Despite these substantive differences, the post-  
68 metamorphic phase of its life cycle is nearly indistinguishable from that of its congener  
69 *H. tuberculata*. The *Heliocidaris* lineages with ancestral and accelerated development

70 diverged only ~4 million years ago (mya) [7]. While this life history switch has arisen  
71 multiple times in echinoderms [8,12,13], the *Heliocidaris* genus remains the best studied  
72 example [14-33]. Loss of the feeding larval stage entails tradeoffs among maternal  
73 investment, offspring survival, and dispersal [12,34-36], although the ecological  
74 consequences of the transition to lecithotrophy are complex and incompletely  
75 understood [37]. Lecithotrophic development in *H. erythrogramma* is accompanied by  
76 dramatic changes to embryogenesis including changed timing of key developmental  
77 events, altered cleavage pattern, axial patterning, and early cell fate specification. The  
78 rapidity with which this developmental mode has arisen in *H. erythrogramma* and its  
79 implications for ecology, suggest that accelerated development is a product of strong  
80 selection for accelerated development rather than of evolutionary drift or selection on an  
81 adult trait.

82

83 **Figure 1. A** Euechinoid mesodermal cell lineages are specified cell-autonomously and non-  
84 autonomously. The skeletogenic mesenchyme (SM) cells arise by an unequal cleavage (smaller  
85 pink cells) and are autonomously specified as the signaling center and prospective skeletogenic  
86 cells. A signaling relay (arrows) initiated by SM cells specifies adjacent cells as non-skeletogenic  
87 mesoderm (NSM) (green). The gene regulatory network activated in these cells was constructed  
88 by individual gene perturbation experiments to identify transcription factors and ligands that must  
89 be expressed in the SM cells for their cell-autonomous specification as prospective skeletogenic  
90 cells (pink), their identity and/or function as a signaling center (green), or both (yellow). **B** Top:  
91 Development in euechinoid planktotrophs drawn from literature. In the ancestral state, the SM  
92 cells ultimately become larval skeleton (pink), but also function as the signaling center that induces

93 specification of other cell lineages, such as coelomic pouch mesoderm, pigment cell mesoderm  
94 and other non-skeletogenic mesenchyme (green). Coelomic pouch mesoderm is the source of  
95 juvenile skeletogenic cells (not pictured). Bottom: Model of development in the lecithotroph *H.*  
96 *erythrogramma* drawn from literature. The timing, lineage, and fate of the embryonic signaling  
97 center is not yet known in detail. No mesodermal sub-types are segregated before the 64-cell stage  
98 and descendants of the yellow shaded area will contribute to skeletogenic mesoderm, coelomic  
99 pouch, pigment cell mesoderm and other NSM, and endoderm. Whether and when larval (pink)  
100 and juvenile (not pictured) skeletogenic cells are segregated is unknown.

101

102       To understand how the ancestral GRN may have changed to accommodate the  
103 shift to lecithotrophy, we chose to focus on a specialized cell lineage shared by all  
104 euechinoid sea urchins [38] that is well studied for its unique developmental role, cell  
105 behaviors, and specification process: the skeletogenic mesenchyme (SM). In the  
106 planktotroph four cells specified early in development, the large micromeres which  
107 become the primary mesenchyme cells, function as a signaling center that can induce a  
108 secondary axis in the early embryo [39,40] and also are committed to become the cells  
109 that synthesize the larval endoskeleton (reviewed in [41,42].) The GRN sub-circuit  
110 responsible for specification of sea urchins' larval SM cells, the SM-GRN,  
111 emerged >250 mya and is nearly invariant among species that diverged ~40 mya [9]. In  
112 indirect developers distinct cell populations synthesize larval and juvenile skeletons  
113 weeks apart in development [43]. The larval skeleton is hypothesized to be a co-option  
114 of adult echinoderm endoskeleton [44,45].

115 *H. erythrogramma* has a greatly reduced larval skeleton and accelerated juvenile  
116 skeleton [26] but whether the GRNs underlying the larval and juvenile skeletons are  
117 conserved with the ancestral euechinoid was unknown. Prior published work on this  
118 species assumed that some or all of the mesenchyme cells that ingress into the  
119 blastocoel during gastrulation (Figure 1B) are skeletogenic, similar to the SM cells in the  
120 planktotroph that ingress shortly before gastrulation, albeit delayed (*e.g.* [16,25,46]).  
121 However, we were surprised to find that these cells do not express classic markers of  
122 the SM lineage. Our evidence is consistent instead with the hypothesis that the larval  
123 SM cell type does not exist in *H. erythrogramma*. We also examined and excluded the  
124 hypothesis that *H. erythrogramma*'s GRN is similar to the modified GRN activated in a  
125 planktotroph embryo experimentally depleted of SM cells, the replacement SM-GRN  
126 [47,48]. Instead, we found evidence that while many gene linkages remain intact, the *H.*  
127 *erythrogramma* GRN has several novel features, as well as features that resemble non-  
128 euechinoid urchins' GRN [49-52]. Our results indicate a surprising degree of lability in  
129 the early developmental GRN associated with the evolution of lecithotrophy in *H.*  
130 *erythrogramma*.

131

## 132 **Results and Discussion**

133 In classically studied, planktotrophic sea urchins, a single cell lineage that is fated to  
134 become larval skeletogenic mesenchyme also functions as an early signaling center to  
135 induce specification of other lineages. Since *H. erythrogramma* does not have obvious  
136 markers of this lineage such as asymmetric cleavage, we sought evidence of 1) the  
137 GRN circuit that specifies skeletogenic fate and 2) known phenotypes and gene

138 expression outputs of signaling interactions coordinated by these cells. We probed the  
139 function of an early essential SM marker, *Alx1* [53], as well as gene expression patterns  
140 of other SM and mesoderm markers. In the euechinoid GRN, few transcription factors  
141 are unique to the planktotrophic larval SM lineage as most are shared by other larval  
142 mesoderm or adult skeletogenic cells. We focused on markers of specifically larval SM  
143 cell identity, especially on the stages from blastula through early rudiment formation. To  
144 ask whether key signaling interactions of the SM cells are conserved, we investigated  
145 three key signaling pathways. In the euechinoid GRN, Wnt signaling initiates  
146 endomesoderm specification and a Delta signal segregates mesoderm from endoderm  
147 [54,55]; MEK-ERK signaling is then required for mesoderm specification to progress  
148 [56,57]. In order to understand how these signaling pathways operate in *H.*  
149 *erythrogramma*, we focused on two time points: hatched blastula, when multiple types  
150 of mesoderm have been specified in indirect developers but before morphogenesis, and  
151 the late larval stage when many differentiated cell types are present.

152

### 153 ***Alx1* is expressed but not localized to mesenchymal cells in *H. erythrogramma***

154 We first asked where the essential skeletogenic regulator gene *Alx1* is expressed in *H.*  
155 *erythrogramma*, and found that its expression pattern differs from the consensus  
156 planktroph. In the ancestral urchin GRN, *Alx1* is necessary to specify skeletogenic cell  
157 fate and is expressed continuously in all and only larval SM cells from early specification  
158 through differentiation [53] and is expressed in larval and juvenile skeletogenic cells  
159 across echinoderms [45,51,52,58-60], suggesting that its skeletogenic function is deeply  
160 conserved.

161 We found *alx1* expressed throughout the vegetal pole at hatched blastula stage  
162 (Figure 2). Although both indirect developers and *H. erythrogramma* show expression  
163 at the extreme vegetal pole, *H. erythrogramma* shows broader expression of *alx1* at this  
164 stage and its localization pattern diverges markedly from the ancestral GRN from this  
165 point onwards. Instead of ingressing prior to gastrulation, *alx1*-positive cells remain in  
166 the archenteron during *H. erythrogramma* gastrulation. Previous work in planktotrophs  
167 has shown that *alx1* is involved in the epithelial-to-mesenchymal transition (EMT) that  
168 allows SM cells to ingress [53,61,62], while *ets1/2* is required for EMT in all  
169 mesenchymal cell types, SM and NSM [63].

170 In *H. erythrogramma*, *ets1/2*-positive mesenchyme cells ingress from the  
171 archenteron but no *alx1*-positive cells are present in the blastocoel during and after this  
172 ingression. If the *alx1*-expressing cells in *H. erythrogramma* undergo EMT it is greatly  
173 delayed relative to the onset of *alx1* expression, and if the *ets1/2*-expressing cells that  
174 ingress during gastrulation later express *alx1* that expression is greatly delayed relative  
175 to EMT. During late gastrula and early rudiment stages *alx1* is expressed throughout the  
176 region homologous to the left coelomic pouch whereas *ets1/2*-expressing cells are  
177 apparent throughout the prospective juvenile in both coelomic pouches and in the  
178 vestibular ectoderm. In later stages *alx1* is expressed in juvenile skeletogenic centers  
179 (Supplemental Figure 1), as in other echinoderms [45,59].

180

181 **Figure 2.** Expression of *alx1* and *ets1/2* in *H. erythrogramma*. **A** *Alx1* is expressed in the vegetal  
182 plate and archenteron throughout gastrulation, but not in ingressed mesenchyme. **B** *Ets1/2* is  
183 expressed in the vegetal plate at blastula stage, and broadly at the tip of the archenteron and



184 ingressed mesenchyme during gastrulation, and throughout the both coelomic pouches and in the  
185 specialized ectoderm that will contribute to the juvenile.

186

187 In all the diverse echinoderm classes known to produce larval skeleton, some or  
188 all of the *alx1*-expressing cells ingress into the blastocoel before or during gastrulation,  
189 where they continue to express *alx1* [51-53,56,60,64-67]. However, an Alx gene is also  
190 expressed in the embryos of echinoderms that do not produce larval skeletons: an  
191 alternative spliceoform of *alx1* (or a closely related paralog, Alx4/Calx) is present in the  
192 vegetal plate and mesodermal bulb of sea stars [60,66,68]. Its function there is  
193 unknown, raising the possibility that Alx1 has an alternative or additional function at the  
194 vegetal pole or in mesoderm specification. Therefore, we decided to examine the  
195 function of Alx1 in *H. erythrogramma*.

196

### 197 **Alx1 is necessary for skeletogenesis in *H. erythrogramma***

198 We used a translation-blocking morpholine-substituted antisense oligonucleotide  
199 (MASO) specific to *alx1* to examine its function *in vivo*. While Alx1 morphants are  
200 delayed overall in indirect developers, eventually all other larval mesoderm sub-types  
201 are recovered through regulative processes so the knockdown phenotype is specific to  
202 SM cells [53]. We found that Alx1 is indeed required for biomineralization of the skeleton  
203 in *H. erythrogramma*. Blocking Alx1 translation eliminates both larval and juvenile  
204 spicules (Figure 3) but does not eliminate any other cell lineage, just as in indirect  
205 developers. However, we did notice a secondary, unexpected phenotype in Alx1

206 morphants: the primary body axis is shortened (mean decrease 15.5% body length,  
207 two-sample  $t(17) = 2.136$ ,  $p = 0.023$ ; raw data in Supplemental File 1).

208

209 **Figure 3.** Alx1 functions in skeletogenesis in *H. erythrogramma* despite its absence in ingressed  
210 mesenchyme. DIC and polarized light views of standard control and *alx1* translation-blocking  
211 morpholino injected *H. erythrogramma*. Skeletogenesis is impaired in *alx1* morphants.

212

213 Thus, Alx1 appears to retain a skeletogenic function in *H. erythrogramma*. Since  
214 the key skeletogenic marker *alx1* and the key mesenchyme marker *ets1/2* are not co-  
215 expressed as in planktotrophs, we next examined other markers of SM cells to ask  
216 whether they were co-expressed with *alx1* to test the hypothesis that SM cell identity  
217 was maintained but EMT bypassed or delayed.

218

219 **Key genes of the ancestral larval SM-GRN are not co-expressed in *H.***

220 ***erythrogramma***

221 Like Alx1, most other SM-GRN genes are also expressed in both larval and adult  
222 skeletogenic cells of indirect developers [45]; very few genes are uniquely expressed in  
223 larval SM cells and known to be absent in juvenile and adult skeletogenic cells or other  
224 larval mesoderm. Thus, co-expression of a suite of transcription factors is the best  
225 current diagnostic marker of the euechinoid larval skeletogenic lineage.

226 We found that components of the larval SM-GRN do not mark a single persistent  
227 cell population in *H. erythrogramma* as in indirect developers and no group of cells co-  
228 expresses the genes of the ancestral larval SM-GRN after blastula stage. Neither the

229 *ets1/2*-positive mesenchyme nor the *alx1*-positive coelomic pouch mesoderm co-  
230 express key diagnostic SM-GRN genes, so it is not simply that one gene was lost from  
231 the conserved sub-circuit (or failure of a single probe). Low sequence divergence  
232 between *H. erythrogramma* and a closely related congeneric species, *H. tuberculata*,  
233 permits probe hybridization across species under identical hybridization conditions. We  
234 used this to test the hypothesis that changes in the expression pattern between *H.*  
235 *erythrogramma* and the ancestral GRN arose concurrently with accelerated  
236 development rather than as a difference in the Heliocidaris lineage from other  
237 planktotrophic sea urchins where the expression of these genes is well characterized.  
238 The T-box gene *Tbr* was restricted to the SM lineage in euechinoid urchins [51,69]  
239 rather than its ancestral role in pan-mesodermal and broad endomesoderm  
240 specification [38,60,65,70,71] but it remains indispensable to activate the normal  
241 endomesoderm GRN [72,73] and the replacement SM-GRN [47,74]. *Tbr*'s placement in  
242 the GRN immediately downstream of the HesC/Pmar1 logic gate and integration into a  
243 circuit with *Alx1* has been proposed as the key event in the evolution of the larval SM  
244 cell type [38,45,75]. Thus, *Tbr* is a key node that integrates the cell identity and  
245 signaling center functions of the sea urchin micromere lineage.

246 Our data suggest that this *Ets1/2-Alx1-Tbr* sub-circuit is absent or transient in *H.*  
247 *erythrogramma*. All three genes show distinct spatiotemporal expression patterns rather  
248 than co-expression in *H. erythrogramma*. Whereas the expression patterns of *ets1/2*  
249 and *tbr* in *H. tuberculata* resemble closely patterns seen in other planktotrophs, in *H.*  
250 *erythrogramma* *tbr* expression is lost at the onset of gastrulation and is not seen in  
251 mesenchyme (Figure 4). Despite the different physical localization of *tbr* transcripts in

252 planktotrophs and lecithotrophs (Figure 4B), whole-transcriptome temporal expression  
253 of *tbr* and *alx1* do not differ (Supplemental Figure 2). Like *Tbr*, *FoxB* is expressed in  
254 both the normal [72] and replacement SM-GRNs [47] but not in the juvenile skeletogenic  
255 cells [45], and was likely co-opted into this GRN in the lineage leading to urchins as it is  
256 absent from brittle star larval SM cells [65]. In *H. tuberculata* *foxB* is expressed in the  
257 skeletogenic mesenchyme cells as in other planktotrophs but *foxB* is not expressed in  
258 either the *ets1/2*-positive mesenchyme or in the *alx1*-positive territory of the archenteron  
259 in *H. erythrogramma* (Figure 4C). *FoxB* is expressed in *H. erythrogramma*'s later larval  
260 stages (Supplemental Figure 2) but not in the skeletogenic centers (not shown).

261

262 **Figure 4.** Expression of key larval SM marker genes in *H. tuberculata* (top rows) and *H.*  
263 *erythrogramma* (bottom rows) at equivalent stages. Note that the two species are different sizes;  
264 both scale bars represent 50  $\mu$ m. Insets show vegetal views. All three genes (*ets1/2*, *tbr*, *foxB*) are  
265 known to be expressed in the replacement SM-GRN as well as the normal SM-GRN. **A** *Ets1/2* is  
266 expressed in many different mesoderm sub-types in *H. tuberculata* as in other planktotrophs. **B**  
267 *Tbr* is expressed exclusively in larval SM cells in the ancestral SM-GRN and this is conserved in  
268 *H. tuberculata*. *Tbr* shows a different expression pattern in *H. erythrogramma*; *tbr* is expressed  
269 similarly to the ancestral pattern at early stages but is not found in mesenchymal cells at any  
270 stage. At blastula, *tbr* is expressed in an asymmetric ring at vegetal pole. At early gastrula; *tbr* is  
271 expressed in the invaginating archenteron but not in the early ingressing mesenchyme; localized  
272 *tbr* expression is not seen after this time point. **C** *FoxB* is expressed in *H. tuberculata* similarly to  
273 other planktotrophs, in SM cells (as well as the archenteron and ventral ectoderm in later stages,  
274 not shown). *FoxB* is co-expressed with *ets1/2* and *tbr* in *H. erythrogramma*'s vegetal pole at

275 blastula stages but is not found in mesenchymal cells at any stage. *FoxB* expression is lost in *H.*  
276 *erythrogramma* after onset of gastrulation.

277

278 We also examined other members of the SM-GRN. We found no evidence of  
279 localized expression for the SM lineage-specific repressor *pmar1* [76,77] in *H.*  
280 *erythrogramma* (Figure 5A). *Pmar1* paralogs appear to have duplicated repeatedly and  
281 diversified independently in various euechinoid species [78] so it is possible that we  
282 have not identified the functionally relevant paralog. However, our *pmar1* probe shows  
283 specific expression in *H. tuberculata* SM cells. We also found that the endomesodermal  
284 Forkhead transcription factor *foxN2/3* is expressed similarly in *H. erythrogramma* as in  
285 the ancestral euechinoid (Figure 5B). In the ancestral euechinoid GRN, *foxN2/3* is found  
286 in pre-ingression SM; its later expression shifts to other endomesodermal territories  
287 [79,80], similar to the pattern in *H. erythrogramma*. Thus, *foxN2/3*'s expression pattern  
288 is consistent with a role in endomesoderm specification.

289

290 **Figure 5.** Expression of other larval SM marker genes in *H. tuberculata* (top rows) and *H.*  
291 *erythrogramma* (bottom rows) at equivalent stages. Note that the two species are different sizes;  
292 both scale bars represent 50  $\mu\text{m}$ . **A** *Pmar1* is expressed only in the normal SM-GRN in  
293 planktotrophs, not the replacement SM-GRN. We were not able to detect *pmar1* expression in *H.*  
294 *erythrogramma* although the probe shows expression in *H. tuberculata* SM cells. Nonspecific  
295 chromogenic staining is visible inside the blastocoel. **B** In both *H. tuberculata* and *H.*  
296 *erythrogramma*, *foxN2/3* is expressed similarly to the consensus euechinoid. *FoxN2/3* is

297 expressed similarly at the vegetal plate and at the tip of the archenteron, but not in fully ingressed  
298 mesenchyme; later it is expressed in the hindgut. Inset shows vegetal view.

299

300       There is a brief window at hatched blastula stage in which the characteristic SM-  
301 GRN genes *alx1*, *ets1/2*, *tbr*, *foxB*, and *foxN2/3* are co-expressed in the vegetal plate  
302 but they never again show co-expression in any *H. erythrogramma* cell type. Expression  
303 of SM differentiation genes downstream of these early genes [81] is absent, reduced, or  
304 delayed relative to indirect developers (Supplemental Figure 2). Taken together, these  
305 data suggest that the larval SM cell lineage known from indirect developers has been  
306 lost from *H. erythrogramma*. We next considered whether signaling functions  
307 coordinated by SM cells in indirect developers were altered in *H. erythrogramma* and  
308 found some striking differences.

309

310 **Early canonical Wnt signaling activates mesodermal genes differently in *H.***

311 ***erythrogramma* than in indirect developers**

312       Canonical Wnt (cWnt) signaling is a deeply conserved activator of  
313 endomesodermal development across bilaterians, including sea urchins [82-84]. The  
314 ancestral GRN predicts that cWnt signaling should expand endoderm at the expense of  
315 ectoderm without dramatically affecting mesoderm. However, it is thought that early  
316 endomesoderm fate specification does not require a secreted Wnt signal but instead  
317 nuclearization of maternally loaded  $\beta$ -catenin [85]. Activation of cWnt with the GSK3- $\beta$   
318 inhibitor LiCl does not expand expression domains of the mesoderm markers *delta* and  
319 *tbr* in indirect developers [55]. Reciprocally, in the indirect developer *S. purpuratus*,

320 treatment with the PORCN inhibitor C59, which prevents secretion of Wnt ligands, does  
321 not affect expression levels of the key mesodermal genes *Alx1*, *Ets1/2*, *Tbr*, or *Gcm*  
322 (<0.2 fold-change [86]).

323 Previous work in *H. erythrogramma* showed that activation of cWnt causes  
324 exogastrulation [32]. Axin and GSK3- $\beta$  work together to destabilize  $\beta$ -catenin, an  
325 effector of cWnt signaling. We found that a translation-blocking MASO targeting *axin2*  
326 phenocopies GSK3- $\beta$  inhibitors, causing exogastrulation (Figure 6A, B). Reciprocally,  
327 treatment with C59 reduces the length of the archenteron. However, cWnt and GSK3- $\beta$   
328 inhibitors affect *H. erythrogramma* gene expression differently than the ancestral GRN  
329 (Figure 6C-H).

330

331 **Figure 6.** Outputs of the canonical Wnt signaling pathway in *H. erythrogramma* differ from  
332 predictions of the ancestral euechinoid GRN. **A** A translation-blocking morpholino targeting *axin2*  
333 induces exogastrulation. **B** The GSK3- $\beta$  inhibitor LiCl induces exogastrulation and the  
334 PORCN inhibitor C59 reduces the archenteron. **C-H** Mesoderm and SM marker gene expression  
335 patterns in Wnt pathway perturbed *H. erythrogramma* blastulae. Insets show vegetal views.

336

337 In *H. erythrogramma*, GSK3- $\beta$  inhibitor treatment expands expression of *delta*, a  
338 marker for SM and NSM in indirect developers, throughout the vegetal pole (Figure 6C).  
339 This is unlike LiCl-treated plinktrophs, which have an essentially normal *delta*  
340 expression pattern [55]. While some treated *H. erythrogramma* embryos show a slight  
341 shift of the *ets1/2* and *tbr* expression domains towards the animal pole, their expression  
342 does not expand towards the vegetal pole as *delta* does with LiCl treatment (Figure 6D,

343 E). This result is similar to what is seen in planktotrophs [55], but in the context of *delta*  
344 expansion suggests that *delta*, *ets1/2*, and *tbr* are not tightly co-regulated as they are as  
345 in the ancestral GRN.

346 Later, during gastrula stages, Wnt signaling dramatically affects mesoderm in *H.*  
347 *erythrogramma* as *ets1/2* expression is expanded in LiCl-treated embryos and reduced  
348 in C59-treated embryos (Figure 6F). *Ets1/2* expression in the exogastrulated cells is  
349 consistent with the observation that much of the archenteron is coelomic pouch  
350 mesoderm rather than endoderm in *H. erythrogramma* [87]. The C59 results show that  
351 *ets1/2* expression likely requires a secreted Wnt signal in *H. erythrogramma*, suggesting  
352 that *ets1/2* transcription is initiated by a GRN that resembles the ancestral  
353 endomesoderm GRN, not the SM-GRN.

354 In the ancestral euechinoid GRN, *hesC* is repressed downstream of cWnt (by  
355 endogenous Tcf/ $\beta$ -catenin via Pmar1) and thus the increased expression of *hesC* in  
356 LiCl-treated *H. erythrogramma* was not predicted by the ancestral euechinoid GRN.  
357 While very early *hesC* expression is uniformly distributed throughout all cells except the  
358 SM in planktotrophs [75], at blastula stages and beyond its expression pattern is much  
359 more complex [88]. However, C59 only slightly decreases *hesC* expression in the  
360 planktotroph at blastula stages and beyond (<0.1-0.3 fold-change [86]), confirming that  
361 cWnt is not a major regulator of *hesC* in the ancestral GRN. However, in *H.*  
362 *erythrogramma*, we find that cWnt is a major driver of *hesC* expression at these stages.

363

364 **Skeletogenic and non-skeletogenic mesenchyme are specified independently of**

365 **Delta-Notch signaling in *H. erythrogramma***



366 To investigate another key ancestral pathway, we focused on Delta-Notch signaling. In  
367 indirect developers a Delta signal from SM cells induces specification of non-  
368 skeletogenic mesoderm (NSM) [89-91]. Perturbing Delta-Notch signaling during  
369 different critical periods eliminates distinct mesodermal cell populations such as pigment  
370 cells and coelomic pouch (which gives rise to adult structures) [92,93]. We found that  
371 two populations of mesoderm respond similarly to Delta inhibition in *H. erythrogramma*  
372 as in the ancestral GRN but one population is regulated differently.

373 We inhibited Delta signaling in *H. erythrogramma* by preventing translation of  
374 *delta* mRNA with an injected MASO or preventing cleavage of the Notch intracellular  
375 domain by treatment with gamma-secretase inhibitors. High and low doses of MASO or  
376 inhibitor abrogated or reduced coelomic pouch formation at all time points tested (Figure  
377 7, Supplemental Figure 3A), just as in the ancestral GRN. At high doses of MASO  
378 (Figure 7A) or inhibitor (Supplemental Figure 3D), axial patterning and gastrulation are  
379 disrupted. At low doses of either the inhibitor or MASO, although gastrulation is  
380 abnormal some endoderm is internalized and differentiates (Figure 7B,C).

381

382 **Figure 7.** The cell types affected by disrupting Delta-Notch signaling in *H. erythrogramma*  
383 overlap with but differ from known planktotroph phenotypes suggesting that the role of Delta  
384 signaling has changed from the ancestral GRN. **A** Control morpholino-injected embryos show  
385 pentamer patterning and red pigmentation under white light (top) and both larval and juvenile  
386 skeleton under polarized light (bottom). Larval (pink arrowhead shows example) and juvenile  
387 (green arrowheads show examples) skeletal elements can be distinguished morphologically. High  
388 dose *delta*-targeting morpholino radializes the embryo but does not eliminate pigmentation or

389 skeleton (white arrowheads); lack of normal morphological markers prevents assignment of  
390 skeleton as larval or juvenile. Late larval stage, oral view. **B** Low dose *delta*-targeting morpholino  
391 permits gastrulation but reduces juvenile rudiment size. Both larval (pink arrowheads) and juvenile  
392 (green arrowheads) skeleton can be distinguished morphologically. **C** Low-dose DAPT treatment  
393 produces a similar phenotype to low-dose morpholino injection; differentiated skeletogenic cells  
394 (skeletal marker msp130 antibody 1D5, green) and endoderm marker (EndoI, magenta) are present.  
395 Skeletal marker single channel shown below; larval (pink arrowheads) and juvenile (green  
396 arrowheads) skeleton can be distinguished morphologically. Additional skeletogenic cells are  
397 visible scattered especially in the ectoderm in and near the vestibule and juvenile skeleton  
398 morphogenesis is abnormal.

399

400       Also as in indirect developers, *H. erythrogramma* do not require a Delta signal to  
401 specify skeletogenic cells. Delta is never necessary for skeletogenic cell fate  
402 specification in the ancestral GRN. Even when SM cells are experimentally depleted,  
403 the alternative mechanism by which they are replaced (the replacement SM-GRN) does  
404 not require Delta [47]. Even in the absence of a normal rudiment, *H. erythrogramma*  
405 skeletogenic cells differentiate and respond to ectodermal patterning cues by migrating  
406 to the normal location of larval skeleton and the ectoderm region which normally would  
407 contribute to the juvenile (Figure 7C, Supplemental Figure 3C). Thus, Delta signaling is  
408 required for specification of coelomic pouch cells but not skeletogenic mesenchyme *H.*  
409 *erythrogramma*, just as in the ancestral GRN.

410 In contrast, the requirement for Delta signaling in pigment cell fate specification in the  
411 ancestral GRN appears to be lost in *H. erythrogramma*. The ancestral euechinoid

412 specification of pigment cells requires Delta [89,91-95] and no regulative mechanism  
413 replaces this cell type if the Delta signal is absent during the early critical window, while  
414 the other mesodermal lineages can be replaced [47,48]. Even *H. erythrogramma*  
415 embryos exposed to high doses of morpholino or drug contain abundant pigment cells  
416 (Figure 7A; Supplemental Figure 3D). We did not observe a delay in the appearance of  
417 pigmentation relative to controls.

418         While it is not possible to conclude from the presence of both differentiated  
419 skeleton and pigment cells in Delta-perturbed *H. erythrogramma* whether these cells  
420 arose by an alternative GRN than those cell types normally do in unperturbed *H.*  
421 *erythrogramma*, the presence of pigment cells is a striking departure from the ancestral  
422 euechinoid GRN. These results, together with previous evidence from *H.*  
423 *erythrogramma*, suggest that the signaling event has been lost rather than a novel  
424 regulative mechanism gained. *H. erythrogramma*'s pigment and skeletogenic cells  
425 derive from a common lineage until at least the 64-cell stage [21,87] but potential to give  
426 rise to pigment cells is segregated by the 2-cell stage [30]. We found reduced maternal  
427 loading of *ets1/2* transcripts and dramatically increased maternal loading of the early  
428 pigment cell marker *gcm* transcripts in *H. erythrogramma* compared to planktotrophs  
429 (Supplemental Figure 2).

430

431 **Blastula-stage *H. erythrogramma* embryos have different transcription factor**  
432 **outputs of Delta signaling than the ancestral GRN**

433 Next, we investigated how Delta signaling influences downstream gene expression. We  
434 found that most mesodermal genes respond differently to Delta signaling in *H.*

435 *erythrogramma* than in the ancestral euechinoid. At blastula stage, DAPT-treated *H.*  
436 *erythrogramma* show expanded *delta* expression in the animal pole domain. This result  
437 differs dramatically from the ancestral GRN, where DAPT treatment decreases *delta*  
438 expression dramatically at the vegetal pole but does not alter the expression pattern at  
439 the animal pole [92]. A second apparent difference concerns *hesC*, which encodes a  
440 transcriptional repressor that appears to have an ancient role in segregating SM from  
441 NSM cells that predates the consensus euechinoid GRN although many of its targets  
442 are specific to euechinoids [96,97] (Figure 1).  
443 DAPT treatment reduces *hesC* expression at both the animal and vegetal poles in *H.*  
444 *erythrogramma* (Figure 8). This result suggests that *hesC* expression in *H.*  
445 *erythrogramma* is controlled at least in part by Delta signaling. In the consensus  
446 euechinoid GRN *hesC* is usually considered to be broadly expressed upstream of *delta*  
447 [75,98], but other data suggest that *delta* expression precedes *hesC*'s clearance from  
448 the vegetal pole [99]. In either case, a negative regulatory relationship between Delta  
449 and HesC appears to be a euechinoid trait, as in cidaroid urchins *hesC* expression is  
450 activated at least in part by Delta [51], similar to our results in *H. erythrogramma*.

451  
452 **Figure 8.** Blastula-stage gene regulatory outputs of Delta signaling in the accelerated  
453 development of *H. erythrogramma*. Interfering with Delta-Notch signaling (by treatment with  
454 the gamma-secretase inhibitor DAPT) expands *delta* expression at the animal pole without  
455 altering the vegetal pole domain expression pattern. *HesC* shows a reciprocal reduction with  
456 *delta* expansion. *Alx1* expression is increased while *ets1/2* expression is decreased at this stage. Of

457 these key mesoderm and SM markers, only *tbr* remains unaffected in DAPT-treated *H.*  
458 *erythrogramma*.

459

460 A Delta-independent positive feedback loop between the transcription factors  
461 Alx1, Ets1/2, and Tbr is characteristic of both normal and replacement SM cells in the  
462 consensus euechinoid GRN. Similarly, in *H. erythrogramma* DAPT treatment does not  
463 affect the expression of *alx1* or *tbr*; in contrast, however, a Delta signaling input appears  
464 to be required for the early phase of the pan-mesodermal marker *ets1/2* expression  
465 (Figure 8). *Ets1/2* expression later recovers (not shown). However, this dramatic  
466 difference in the initiation of early *ets1/2* expression suggests that this key mesodermal  
467 gene is not expressed early and cell-autonomously as in the ancestral GRN.

468

469 **Similar cell types require MEK-ERK cascade in ancestral and accelerated GRNs,**  
470 **but early transcription factor expression differs**

471 In the ancestral sea urchin GRN, MEK-ERK signaling is required in SM cells for  
472 skeletogenic identity but not endomesodermal signaling center function [56,57]. The  
473 selective MEK inhibitor UO126 arrests SM differentiation at the time of treatment [56]  
474 and is used commonly in sea urchins to produce this phenotype [61,100]. Other larval  
475 mesoderm types also require MEK signaling; the UO126 phenotype is well  
476 characterized in the consensus GRN and thought to be mediated by preventing  
477 phosphorylation of the pan-mesodermal transcription factor Ets1/2 [56,101], which is  
478 also required to activate the replacement SM-GRN when normal SM cells are  
479 experimentally depleted (at least in part by activating *tbr* transcription) [47,102].

480 Like the ancestral GRN, UO126-treated *H. erythrogramma* embryos have greatly  
481 reduced skeleton and pigmentation (Figure 9). Left-right patterning within the  
482 endomesoderm but not the ectoderm is disrupted in the ancestral GRN [100] and  
483 similarly in *H. erythrogramma* the ectoderm is patterned normally along this axis  
484 although the rudiment is abnormal. However, as with Delta signaling, the similar  
485 downstream phenotype apparently conceals an alternate GRN topology as the  
486 expression of key mesodermal transcription factors at hatched blastula stage differs  
487 dramatically from the ancestral GRN. UO126 treatment eliminates the *ets1/2* expression  
488 pattern but does not affect the expression pattern of *tbr*. This is just the opposite of the  
489 ancestral GRN in which loss of *tbr* expression is diagnostic for the SM-GRN's failure in  
490 the absence of MEK-ERK signaling [47,102] (although *tbr* expression may recover by  
491 gastrula stage in planktotrophs [61]). Later *ets1/2* expression is not affected by UO126  
492 treatment (not shown).

493  
494 **Figure 9.** While differentiated cell type phenotypes of the MEK-ERK signal transduction  
495 cascade with the small molecule inhibitor UO126 are similar in *H. erythrogramma* as in  
496 planktotrophs, the early GRN linkages differ. **A** The MEK-ERK signal inhibitor UO126  
497 treatment reduces skeleton and pigmentation in larva stage *H. erythrogramma* as it does in the  
498 ancestral GRN. **B** Despite similar differentiated cell type phenotypes, blastula-stage gene  
499 regulatory outputs of MEK-ERK inhibitor treatment in *H. erythrogramma* and the consensus  
500 euechinoid. UO126 treatment greatly affects *ets1/2* expression pattern but minimally affects the  
501 *tbr* expression pattern.

502

503 Thus, regardless of whether the same set of cells coordinate these three  
504 signaling pathways in the early embryo, the transcriptional outputs and downstream  
505 phenotypic effects of each signaling pathway differ somewhat from the ancestral state,  
506 the consensus euechinoid planktotroph GRN.

507

## 508 **Conclusion**

### 509 ***H. erythrogramma's* early developmental GRN was rewired to delete the SM-GRN** 510 **sub-circuit**

511 The sum total of evidence from this study re-casts previous studies in *H. erythrogramma*  
512 to suggest a novel conclusion: this species lacks a dedicated larval skeletogenic  
513 mesenchyme cell population. In planktotrophic euechinoid sea urchins the SM lineage  
514 functions both as the embryonic endomesodermal signaling center and the exclusive  
515 source of larval skeletogenic cells in normal development. This cell lineage exhibits 1)  
516 unique cell behaviors, such as asymmetric cleavage, early ingression, and directed  
517 migration within the blastocoel; 2) a unique suite of co-expressed transcription factors  
518 that specify its skeletogenic cell fate, its role as a signaling center, or both; and 3) a  
519 defined set of cell signaling interactions by which it induces other endomesodermal cell  
520 types and by which its member cells differentiate into skeleton.

521 Prior studies noted that *H. erythrogramma* lacks a population of cells exhibiting  
522 asymmetric cleavage or pre-gastrula ingression [17,87]. Here, we show that it also lacks  
523 a population of internalized cells that co-express key larval SM-GRN genes. Taken  
524 together, these data suggest that the larval SM lineage as described in indirect  
525 developers does not exist in *H. erythrogramma*. Not all echinoderms possess larval

526 skeletons so SM cell identity and signaling center functions clearly do not need to be  
527 integrated. In the ancestral euechinoid state, as late-stage larvae approach  
528 metamorphosis, skeletogenic cells distinct from larval SM cells and thought to derive  
529 from the coelomic pouch mesoderm migrate into the blastocoel and localize near  
530 growing larval skeleton [103]. This suggests that prospective juvenile skeletogenic cells  
531 are motile, can migrate outside the rudiment, and respond to the same patterning cues  
532 as larval SM. We hypothesize that *H. erythrogramma*'s apparent larval skeleton may  
533 arise similarly, from cells specified by the juvenile GRN. Interestingly, another  
534 echinoderm with independently derived accelerated development retains an unequal  
535 cleavage that gives rise to cells that behave similarly to the ancestral SM cells and  
536 which do become part (but not all) of the larval skeleton [104]. However, these cells lack  
537 the signaling center function [105].

538         Our results show a surprising degree of re-wiring in the early *H. erythrogramma*  
539 gene regulatory network that was not apparent from single-gene or whole-transcriptome  
540 studies. Instead, our data suggest the *H. erythrogramma* GRN as a whole is connected  
541 differently than previously described GRNs known from sea urchins in which the normal  
542 consensus euechinoid SM-GRN is not activated, *i.e.* euechinoid planktotrophs  
543 experimentally depleted of SM cells or urchin groups such as cidaroids that specify SM  
544 with a different GRN than euechinoids.

545         We initially considered the hypothesis that *H. erythrogramma*'s mesoderm  
546 specification GRN recapitulates a well-documented phenomenon in other sea urchins  
547 where experimental removal of precursor or differentiated SM cells triggers activation of  
548 the SM-GRN in another cell population to produce replacement SM cells [47,74].



549 However, *H. erythrogramma*'s GRN does not match this simple model; it is not merely a  
550 planktotrophic euechinoid missing SM cells. Co-expression of key skeletogenic markers  
551 such as *foxB* and *tbr* is absent from internalized cells, not delayed as in the replacement  
552 SM-GRN. In addition, while the MEK-ERK inhibitor UO126 prevents SM (and other  
553 mesoderm) specification in *H. erythrogramma* as it does in the ancestral euechinoid, it  
554 does not appear to do so by preventing *tbr* transcription, which would be expected for  
555 the planktotroph SM-GRN at this stage [106].

556 We also considered the possibility that the *H. erythrogramma* SM-GRN  
557 resembles that of the cidaroid urchin lineage that diverged prior to the evolution of the  
558 consensus euechinoid GRN. We found both similarities and striking differences  
559 between the two GRNs. Our observation of a Delta signaling input into *alx1* and *hesC* in  
560 *H. erythrogramma* resembles the cidaroid GRN [49,51]; however, while cidaroids deploy  
561 Tbr in NSM such as pigment cells [51,52] *H. erythrogramma* does not show localized *tbr*  
562 expression in any mesenchyme cells. Finally, while some elements appear to be  
563 conserved from the ancestral endomesodermal GRN rather than the SM-GRN, such as  
564 Wnt and Delta control of *ets1/2* transcription, other connections, such as Wnt signaling  
565 activation of *hesC* appear to be *H. erythrogramma* novelties.

566

567 **Figure 10.** Partial GRN for *H. erythrogramma* mesoderm specification in its evolutionary context.

568 **A** The consensus euechinoid GRN, developed from independent investigations in different sea  
569 urchin species, is highly conserved among species diverged ~40 mya, and many of its features  
570 arose with the echinoid GRN 250 mya or earlier. **B** Partial mesoderm GRN for the non-euechinoid  
571 echinoids drawn from studies in two cidaroid urchin species, *E. tribuloides* and *P. baculosa*. The

572 consensus euechinoid and non-euechinoid GRNs diverged over >268 mya but show a great deal  
573 of conservation, including a MEK-ERK signal requirement for SM and NSM and HesC repression  
574 of *alx1*. Features not found in the euechinoid network include repression of *alx1* downstream of  
575 Delta signaling and Tbr input into NSM. **C** The consensus euechinoid developmental GRN, also  
576 illustrated in Figure 1. Novelities in the euechinoid GRN include the appearance of the double-  
577 negative gate logic (Pmar1/HesC double repression) for specifying SM precursors, new HesC  
578 regulatory inputs into *ets1/2* and *tbr*, and restriction of *tbr* to the skeletogenic lineage. **D** Our  
579 proposed GRN for *H. erythrogramma* mesoderm specification. We found extensive changes to the  
580 *H. erythrogramma* GRN despite only ~4 million years divergence, including loss of the double-  
581 negative gate logic for specifying SM precursors, loss of Delta signal induction of non-  
582 skeletogenic mesoderm (NSM), and loss of *tbr* from larval SM.

583 In B-D, solid lines show experimentally validated GRN connections. Dashed lines in *H.*  
584 *erythrogramma* and *E. tribuloides* GRNs show connections hypothesized based on indirect  
585 evidence such as co-expression or assuming the null hypothesis that they are the same as the  
586 euechinoid GRN when no evidence is available. Grey lines in *H. erythrogramma* and *E. tribuloides*  
587 GRNs show consensus euechinoid GRN connections absent from those alternative GRNs. Circular  
588 diagrams for each GRN represent a vegetal view of fate map for a blastula-stage embryo.

589

590 The evolutionary changes in developmental gene expression and cell signaling  
591 that we document above are striking in the context of the prior deep conservation of the  
592 sea urchin GRN. Many of these features date back at least to the last common echinoid  
593 ancestor ~268 mya and all date back at least to the last common ancestor of the best-  
594 studied euechinoids ~40 mya – yet profound changes have evolved in less than 4 million

595 years within the genus *Heliocidaris*. Our results indicate that either the long evolutionary  
596 conservation of this GRN is not a product of an inherent developmental constraint or that  
597 constraint was somehow released. This suggests that even highly conserved features of  
598 development, including the earliest steps that pattern the embryo, can be evolutionarily  
599 labile under the right conditions. In the case of *H. erythrogramma*, those conditions likely  
600 include selection for abbreviated premetamorphic development. We hypothesize that  
601 some evolutionary changes to the *H. erythrogramma* GRN, such as removal of the SM  
602 sub-circuit described here, are the product of positive selection on interactions within the  
603 GRN of early development. Further tests of the GRN to identify stasis or change, formal  
604 tests for selection on the genome, and identification of specific cis and trans regulatory  
605 changes underpinning GRN differences, and similar studies in other lecithotrophic urchins  
606 will help to identify points of lability and constraint in the developmental GRN .

607

## 608 **Supplemental Figures**

609 **Supplemental Figure 1.** Spatiotemporal expression of *alx1* in *H. erythrogramma* (supplemental  
610 to Figure 2). External, vegetal view at hatched blastula stage shows *alx1* expression throughout  
611 the vegetal pole rather than in a ring. At early gastrula stage, vegetal view shows *alx1* restricted to  
612 the archenteron. From late gastrula, *alx1* is expressed in the left coelomic pouch (green arrowheads)  
613 but not overlying ectoderm. Additional *alx1* expression at the site where vestigial larval skeleton  
614 will be synthesized (pink arrowheads) is the earliest demonstrated localized expression of any SM  
615 marker at the prospective site of larval skeletogenesis in *H. erythrogramma*. Foci of juvenile *alx1*  
616 expression arranged in a pentamerally symmetrical pattern with two foci per tube foot (green  
617 arrowheads) as well as larval *alx1* expression behind the rudiment (pink arrowheads).

618

619 **Supplemental Figure 2.** Expression profiles of key SM genes in from whole-transcriptome  
620 profiling in *H. erythrogramma*, *H. tuberculata* and *L. variegatus* at equivalent stages. Interestingly,  
621 in contrast to *ets1/2*, which is expressed at a much lower level in early *H. erythrogramma* embryos,  
622 *delta* and its target gene *gcm* are expressed at a higher level. These early NSM genes each show  
623 quantitative differences in expression in *H. erythrogramma* although the timing of their expression  
624 changes resembles planktotrophs. Note that skeletogenic differentiation genes (K-T) are all  
625 significantly delayed in *H. erythrogramma*.

626

627 **Supplemental Figure 3. A** Inhibition of Delta/Notch signaling by DAPT does not eliminate  
628 pigment cells at any time point but affects coelomic pouch specification throughout early  
629 development. Coelomic pouch specification is strongly inhibited any time prior to or during  
630 gastrulation. Raw data in Supplemental File 1. Note that reduced biomineralization of skeleton  
631 with DAPT treatment has been observed previously in other sea urchins [107], so raw counts of  
632 biomineralized elements do not reflect presence/absence of skeletogenic cells. **B** The gamma-  
633 secretase inhibitor LY411575 is an even more specific inhibitor of Delta/Notch signaling than  
634 DAPT [108,109], which has some off-target effects in the p38 MAPK pathway[110,111]. Even  
635 high doses of the inhibitor do not eliminate pigment cells. **C** DAPT inhibitor treatments in the  
636 indirect developing urchin *L. variegatus* confirm results as predicted by knockdown experiments  
637 in several species used to construct the consensus indirect developer GRN (DAPT's effect on *hesC*  
638 and *delta* expression in a model indirect-developing euechinoid [92]). **D** Delta and HesC mRNAs  
639 are expressed in complementary patterns during much of *H. erythrogramma* development.

640

641 **Methods**

642 **Reagents**

643 Reagent brand and stock information is detailed in Supplemental File 1.

644

645 **Animals and embryo cultures**

646 Adult *H. erythrogramma* and *H. tuberculata* were obtained off the east coast of Australia  
647 at Little Bay, New South Wales (33°58'S, 151°14'E) and maintained in natural sea water  
648 aquaria at ambient temperature (20–23°C). Adult *L. variegatus* were collected near  
649 Duke University Marine Lab in Beaufort, NC USA (34°43'N, 76°40'W) or obtained  
650 commercially from Reeftopia (Key West, FL, USA) and maintained in artificial seawater  
651 at ambient temperature (20–23°C). Animals were spawned by intracoelomic injection of  
652 0.5 M KCl and gametes collected in Millipore-filtered natural sea water (FSW). Control  
653 time course embryos were cultured in FSW. Embryo cultures were maintained at  
654 ambient temperatures or in a cooling water bath set at 22°C. Time points are  
655 summarized in Table 1, detailed version in Supplemental File 1).

656

**Table 1: Key stages in *H. erythrogramma* development at ~22° C**

| <b>stage</b>            | <b>hpf</b> | <b>key features</b>                        |
|-------------------------|------------|--------------------------------------------|
| unfertilized egg        | 0          | egg                                        |
| wrinkled blastula       | 6-8        | early blastula                             |
| <b>hatched blastula</b> | 10-12      | embryo hatches from fertilization envelope |
| early gastrula          | 18         | archenteron begins invagination            |

|                            |        |                                                |
|----------------------------|--------|------------------------------------------------|
| mid-gastrula               | 24-26  | archenteron full-length                        |
| early larva                | 32     | coelom compartments; vestibule ingression      |
| early rudiment larva       | 36     | skeleton biomineralization begins              |
| <b>late rudiment larva</b> | 52-56  | larval and juvenile skeletal elements co-occur |
| early metamorphosis        | 72-120 | tube feet emerge; extensive juvenile skeleton  |

657

## 658 **Morpholine-substituted oligonucleotides**

659 MASOs were designed against the translation start sites of target genes and  
660 synthesized by Gene Tools. MASO sequences and effective concentrations are in Table  
661 2. Morpholino doses were titrated empirically to the lowest effective dose.

662

### 663 **Table 2: Translation-blocking MASO sequences**

| <b>target gene</b> | <b>sequence</b>           | <b>effective concentration</b>     |
|--------------------|---------------------------|------------------------------------|
| alx1               | ATCAATTCGGAGTTAAGTCTCGGCA | 100 $\mu$ M                        |
| axin2              | CTAGACTCATGTCTGCACATTGTAG | 50 $\mu$ M                         |
| delta              | ACTCCAGTTAAAACGCCCATAGTT  | 500 $\mu$ M ("low"), 1 mM ("high") |
| Standard Control   | CCTCTTACCTCAGTTACAATTTAT  | matched to experimental            |

664

## 665 **Microinjection**

666 Microinjection was performed as described in (Edgar et al, in review). Needles were  
667 pulled on a Sutter p97 micropipette puller from WPI needle stock (TW100F-6).

668 Reagents were mixed with fluorescent injection mix (RNase-free 2X injection mix: 3.5  $\mu$ l  
669 water, 6.5  $\mu$ l 150 mg/ml lysine-fixable fixable TMR dextran 10,000 MW, 2.0  $\mu$ l 4M KCl,  
670 8.0  $\mu$ l glycerol). Fertilized embryos were injected before first cleavage on agarose pads  
671 in a solution of pasteurized (30 minutes 65°C) filtered seawater (PFSW) + 2% w/v Ficoll  
672 400 (Sigma F-9378). Embryos were hand-sorted for fluorescence between second and  
673 sixth cleavage cycles. Injected embryos were cultured in IVF dishes (Thermo-Fischer  
674 176740) or gelatin-coated dishes in PFSW + penicillin (100 unit/ml) and streptomycin  
675 sulfate (0.1 mg/ml) (Sigma P4333A).

676

#### 677 **Fixation**

678 For general morphological analysis, ISH, and IHC, embryos were fixed overnight (~16  
679 hours) at 4°C in 4% paraformaldehyde (Sigma 158127) + 20 mM EPPS (Sigma E1894),  
680 washed 3 times in pasteurized filtered seawater, and dehydrated step-wise into 100%  
681 methanol and stored at -20°C in non-stick tubes.

682

683 For biomineralized skeleton morphological analyses, embryos were fixed with 2.5%  
684 (v/v) glutaraldehyde (ProSciTech, Australia) in filtered seawater for 1 hour at 4°C,  
685 washed in FSW, dehydrated in an ethanol series to 70% (v/v) ethanol in Milli-Q water,  
686 adjusted to pH 7.8 with glycerophosphate (after [112,113] and stored at -20°C. To  
687 image, embryos were dehydrated completely into methanol and cleared in 2:1 (v/v)  
688 benzyl benzoate: benzyl alcohol.

689

690 **Probe constructs**

691 PCR primers were designed from mRNA sequences in the reference transcriptome  
692 published in [14] using PrimerBLAST (NCBI) and synthesized by IDT or EtonBio. Primer  
693 sequences are listed in Table 3.

694

**Table 3: Primers**

| <b>primer</b>   | <b>sequence</b>            |
|-----------------|----------------------------|
| Alx1 forward    | CTC TCG CTG ACT ATC GGG TG |
| Alx1 reverse    | ACG GGT GCA TTT CGG TGT AT |
| Ets1/2 forward  | ATGGCATCTATGCACTGTTC       |
| Ets1/2 reverse  | GAT ACA GCA GCG GGA ATA    |
| FoxN2/3 forward | CGA ATG GAC AAA GGA CCA CT |
| FoxN2/3 reverse | TCT GGT GAT GGG GTA CAC TT |
| pmar1 forward   | ATGGCAGATTCCACGATGATC      |
| pmar1 reverse   | CTACGAGAGAGAAAGCCTCGA      |
| Tbr forward     | TCCAAATGCTGTACAAAGCA       |
| Tbr reverse     | TAATACGACTCACTATAGGGCC     |

695

696 Probe inserts were ligated into pGEM T-easy (Promega) according to kit instruction.  
697 Full-length He-HesC was synthesized in vitro by GenScript and subcloned. Plasmid  
698 information is in Table 4.

699



**Table 4: Plasmids**

| <b>name</b>             | <b>insert NCBI number</b> | <b>reference</b> |
|-------------------------|---------------------------|------------------|
| He-Alx1-in-pGEM-T       | MK749160                  | this study       |
| He-Ets1-probe-pGEM-T    | MK749161                  | this study       |
| He-Tbr-probe-pGEM-T     | MK749162                  | this study       |
| He-HesC-FL-in-pBS       | MK749159                  | this study       |
| He-Delta                |                           | Koop et al 2017  |
| He-FoxN2/3-probe-pGEM-T | MK749163                  | this study       |
| He-FoxB-probe-pGEM-T    |                           | this study       |
| He-pmar-probe-pGEM-T    | MK876229                  | this study       |

700

701 **Small molecule inhibitor treatments**

702 Small molecule effective doses were empirically titrated with starting doses above and  
703 below published effective concentrations for other echinoderms; optimal doses were  
704 close to published values from other sea urchin species. Effective concentrations are in  
705 Table 5. For scored treatments and ISH analysis, biological replicates consisted of 3  
706 unique crosses, typically fertilized, treated, and fixed in parallel to ensure similar  
707 ambient temperatures (however, DAPT time course experiment, Supplemental Figure  
708 1A, includes fewer biological replicates; raw data in Supplemental File 1). Vehicle  
709 controls were treated with an identical volume of the same solvent. We chose to score  
710 for presence/absence of skeletal elements because the size and number of elements  
711 may be affected independently of initial specification, while inhibitors tested may have

712 effects on adult skeletogenic cells; for example, DAPT is known to inhibit differentiation  
713 of adult sea urchin skeletogenic cells [107].

714

715 **Table 5: Small molecule inhibitors**

| <b>inhibitor</b> | <b>concentrations tested</b> | <b>optimal dose</b>                    | <b>vehicle</b>   |
|------------------|------------------------------|----------------------------------------|------------------|
| DAPT             | 5, 8, 10, 12, 16 $\mu$ M     | 5 $\mu$ M ("low"), 10 $\mu$ M ("high") | DMSO             |
| LY-411575        | 0.1, 1.0, 10 $\mu$ M         | 1 $\mu$ M                              | DMSO             |
| UO126-EtOH       | 6, 12, 24 $\mu$ M            | 12 $\mu$ M                             | DMSO             |
| C59              | 0.5, 1.0, 2.0 $\mu$ M        | 2.0 $\mu$ M                            | DMSO             |
| LiCl             | 20 mM                        | 20 mM                                  | H <sub>2</sub> O |

716

717 **Whole-mount in situ hybridization**

718 Chromogenic whole mount in situ hybridization after the methods previously published  
719 [23] and detailed in Table 6. Briefly, digoxigenin-labeled RNA probes were prepared  
720 from either restriction-digested plasmids or PCR products containing a T7 promoter site.  
721 Control ISH patterns were determined using a mix of at least 3 biological replicates  
722 (control cultures from unique crosses). Hybridizations were carried out at 65°C and  
723 stringency washed at 0.1% SSC.

724

725 *H. erythrogramma* to *H. tuberculata* comparison ISH were carried out in parallel with *H.*  
726 *erythrogramma* probes (*ets1/2*, *foxB*, *foxN2/3*, *hesC*, *pmar1*, *tbr*) using the same

727 reagents and equipment; each included 2-3 biological replicates for each developmental  
728 stage. Sense probes prepared from the same constructs and no probe controls did not  
729 exhibit localized expression patterns.

730

### 731 **Whole-mount immunohistochemistry**

732 Immunohistochemistry protocol is summarized in Supplemental File 7. The Endo-1  
733 monoclonal antibody labels sea urchin endoderm [114] (used at 1:100, mouse IgG) and  
734 1D5 recognizes the skeletogenic cell-specific cell-surface protein msp130 [115] (used at  
735 1:50, mouse IgM). Secondary antibodies (goat-anti mouse IgG and IgM conjugated with  
736 AlexaFluor 647, 488) were used at 1:1000. Hoescht was used at 1:10,000 to  
737 counterstain nuclei.

738

### 739 **Image capture**

740 *H. erythrogramma* embryos were washed with 100% ethanol or methanol, then were  
741 cleared and mounted in 2:1 (v/v) benzyl benzoate: benzyl alcohol (BB:BA). *H.*  
742 *tuberculata* embryos were cleared with either BB:BA or 50% glycerol. *L. variegatus*  
743 embryos were cleared with 50% glycerol. DIC and fluorescence micrographs were  
744 taken on either an Olympus BX60 upright microscope with an Olympus DP73 camera or  
745 a Zeiss Upright AxioImager with a Zeiss MRm or a Zeiss ICc1 camera using ZEN Pro  
746 2012 software.

747

### 748 **Image manipulation and scoring**

749 Morphological measurements were made in ImageJ 2.0.0 using the standard Measure  
750 tool. Presence/absence measurements were scored manually. Fixed samples were  
751 viewed under polarized light to visualize the birefringent calcite skeleton, and under  
752 white light to visualize pigment cells and general morphology. Larval and prospective  
753 juvenile skeletal elements are identified by morphology: larval elements are bilaterally  
754 symmetrical according to the larval ectoderm while juvenile elements are arranged in a  
755 pentamerally symmetric pattern in a plane on the prospective oral juvenile ectoderm.

756

757 Illustrations were drawn, figure panels were assembled and additions such as arrows,  
758 panel labels, and scale bars were added with Adobe Illustrator. No other adjustments  
759 were made except to the fluorescent images (Figure 3D), which were contrast-adjusted  
760 using identical cutoff values in ZEN Pro to reduce background fluorescence. Raw .czi  
761 files are available as Supplemental Files 2 and 3.

762

### 763 **Gene expression analysis**

764 We analyzed gene expression of key skeletogenic and endomesoderm GRN genes  
765 based on a previously published data set [14] using the R packages edgeR 3.16.5 [116]  
766 and maSigPro 1.46.0 [117]. An R Markdown file to replicate these results is available in  
767 Supplemental File 4 (requires Table S6 of Israel et al 2016,  
768 [journal.pbio.1002391](https://doi.org/10.1093/journal.pbio.1002391).s015.csv, as input).

769

### 770 **Acknowledgements**

771 Several former members of the Byrne lab contributed materially to this project. Thanks  
772 to Demian Koop for acquiring the images in Figure 2 A-F and rearing and collecting  
773 some of the *H. tuberculata* embryos, Paula Cisternas for collecting preliminary data (not  
774 shown) with the MEK inhibitor UO126, and both of them for providing lots of advice on  
775 *H. erythrogramma* protocols. Lingyu Wang treated and fixed all the embryos in Figure 2  
776 as well as some control time course embryos. We gratefully acknowledge Matt Naylor,  
777 Pauline Aubel, and Haydn Allbutt who kindly provided access to key pieces of  
778 equipment at the University of Sydney. Steven D. Black provided insightful feedback on  
779 a previous version of this manuscript, as did many members of the Wray and McClay  
780 labs.

781

782 This work was funded by National Science Foundation grant IOS-1457305, by  
783 Australian Research Council grant DP120102849, and by NIH RO1 HD14483 and PO1  
784 HD37105.

785

## 786 **References**

- 787 1. Halfon MS. Perspectives on Gene Regulatory Network Evolution. Trends in  
788 Genetics. Elsevier Ltd; 2017;33: 436–447. doi:10.1016/j.tig.2017.04.005
- 789 2. True JR, Haag ES. Developmental system drift and flexibility in evolutionary  
790 trajectories. Evolution & Development. 2001;3: 109–119.
- 791 3. Shashikant T, Khor JM, Etensohn CA. From genome to anatomy: The  
792 architecture and evolution of the skeletogenic gene regulatory network of sea  
793 urchins and other echinoderms. genesis. 2018;56: e23253–20.  
794 doi:10.1002/dvg.23253
- 795 4. Arnone MI, Andrikou C, Annunziata R. Echinoderm systems for gene regulatory  
796 studies in evolution and development. Current Opinion in Genetics &  
797 Development. 2016;39: 129–137. doi:10.1016/j.gde.2016.05.027

- 798 5. Arnone MI, Byrne M, Martínez P. Echinodermata. Evolutionary Developmental  
799 Biology of Invertebrates, Vol 6 (Deuterostomia). 2015.
- 800 6. Hinman VF, Cheatle Jarvela AM. Developmental gene regulatory network  
801 evolution: Insights from comparative studies in echinoderms. McClay D,  
802 Etensohn C, editors. *genesis*. 2014;52: 193–207. doi:10.1002/dvg.22757
- 803 7. Hart MW, Abt CHJ, Emler RB. Molecular phylogeny of echinometrid sea urchins:  
804 more species of *Heliocidaris* with derived modes of reproduction. *Invertebrate*  
805 *Biology*. 2011;130: 175–185. doi:10.1111/j.1744-7410.2011.00231.x
- 806 8. Raff RA, Byrne M. The active evolutionary lives of echinoderm larvae. *Heredity*.  
807 2006;97: 244–252. doi:10.1038/sj.hdy.6800866
- 808 9. Gildor T, Ben-Tabou de-Leon S. Comparative Study of Regulatory Circuits in  
809 Two Sea Urchin Species Reveals Tight Control of Timing and High  
810 Conservation of Expression Dynamics. Wray GA, editor. *PLoS Genet*. 2015;11:  
811 e1005435. doi:10.1371/journal.pgen.1005435.s006
- 812 10. Raff RA, Smith MS. Chapter 7 - Axis Formation and the Rapid Evolutionary  
813 Transformation of Larval Form [Internet]. 1st ed. Elsevier Inc; 2009. pp. 163–  
814 190. doi:10.1016/S0070-2153(09)01007-2
- 815 11. Byrne M. Life history diversity and evolution in the Asterinidae. *Integrative and*  
816 *Comparative Biology*. 2006;46: 243–254. doi:10.1093/icb/icj033
- 817 12. Strathmann RR. Feeding and Nonfeeding Larval Development and Life-History  
818 Evolution in Marine Invertebrates. *Annual Review of Ecology and Systematics*.  
819 *Annual Reviews*; 1985;16: 339–361. doi:10.2307/2097052?ref=search-  
820 gateway:f84f763e86d5d724fb0867e390a3d5d5
- 821 13. McEdward LRAJDA. Relationships among development, ecology, and  
822 morphology in the evolution of Echinoderm larvae and life cycles. 1997;: 1–20.
- 823 14. Israel JW, Martik ML, Byrne M, Raff EC, Raff RA, McClay DR, et al.  
824 Comparative Developmental Transcriptomics Reveals Rewiring of a Highly  
825 Conserved Gene Regulatory Network during a Major Life History Switch in the  
826 Sea Urchin Genus *Heliocidaris*. Hurst LD, editor. *Plos Biol*. 2016;14: e1002391.  
827 doi:10.1371/journal.pbio.1002391.s016
- 828 15. Israel JW. Sea Urchin Body Plan Development and Evolution: An Integrative  
829 Transcriptomic Approach . McClay DR, Wray GA, editors. 2015. pp. 1–167.
- 830 16. Parks AL, Parr BA, Chin J-E, Leaf DS, Raff RA. Molecular analysis of  
831 heterochronic changes in the evolution of direct developing sea urchins. *Journal*  
832 *of Evolutionary Biology*. 1988;1: 27–44.

- 833 17. Wray GA, Raff RA. Evolutionary modification of cell lineage in the direct-  
834 developing sea urchin *Heliocidaris erythrogramma*. *Developmental Biology*.  
835 1989;132: 458–470.
- 836 18. Henry JJ, Raff RA. Evolutionary change in the process of dorsoventral axis  
837 determination in the direct developing sea urchin, *Heliocidaris erythrogramma*.  
838 *Developmental Biology*. 1990;141: 55–69. doi:10.1016/0012-1606(90)90101-n
- 839 19. Morris VB. Coelomogenesis during the abbreviated development of the echinoid  
840 *Heliocidaris erythrogramma* and the developmental origin of the echinoderm  
841 pentamerous body plan. *Evolution & Development*. 2011;13: 370–381.  
842 doi:10.1111/j.1525-142X.2011.00492.x
- 843 20. Henry JJ, Klueg KM, Raff RA. Evolutionary dissociation between cleavage, cell  
844 lineage and embryonic axes in sea urchin embryos. *Development*. 1992;114:  
845 931–938.
- 846 21. Wray GA, Raff RA. Novel Origins of Lineage Founder Cells in the Direct-  
847 Developing Sea Urchin *Heliocidaris erythrogramma*. *Developmental Biology*.  
848 1990;141: 41–54.
- 849 22. Minsuk SB, Turner FR, Andrews ME, Raff RA. Axial patterning of the pentaradial  
850 adult echinoderm body plan. *Dev Genes Evol*. 2009;219: 89–101.  
851 doi:10.1007/s00427-009-0270-3
- 852 23. Koop D, Cisternas P, Morris VB, Strbenac D, Yang JYH, Wray GA, et al. Nodal  
853 and BMP expression during the transition to pentamerous in the sea urchin  
854 *Heliocidaris erythrogramma*: insights into patterning the enigmatic echinoderm  
855 body plan. 2017;; 1–13. doi:10.1186/s12861-017-0145-1
- 856 24. Wilson KA, Andrews ME, Raff RA. Dissociation of expression patterns of  
857 homeodomain transcription factors in the evolution of developmental mode in  
858 the sea urchins *Heliocidaris tuberculata* and *H. erythrogramma*. *Evolution &*  
859 *Development*. 2005;7: 401–415. doi:10.1111/j.1525-142X.2005.05045.x
- 860 25. Zhou N, Wilson KA, Andrews ME, Kauffman JS, Raff RA. Evolution of OTP-  
861 independent larval skeleton patterning in the direct-developing sea urchin,  
862 *Heliocidaris erythrogramma*. *J Exp Zool*. 2003;300: 58–71. doi:10.1002/jez.b
- 863 26. Emlet RB. Larval spicules, cilia, and symmetry as remnants of indirect  
864 development in the direct developing sea urchin *Heliocidaris erythrogramma*.  
865 *Developmental Biology*. 1995;167: 405–415. doi:10.1006/dbio.1995.1037
- 866 27. Smith MS, Collins S, Raff RA. Morphogenetic mechanisms of coelom formation  
867 in the direct-developing sea urchin *Heliocidaris erythrogramma*. *Dev Genes*  
868 *Evol*. 2009;219: 21–29. doi:10.1007/s00427-008-0262-8



- 869 28. Minsuk SB, Raff RA. Co-option of an oral–aboral patterning mechanism to  
870 control left–right differentiation: the direct-developing sea urchin *Heliocidaris*  
871 *erythrogramma* is sinistralized, not ventralized, by NiCl<sub>2</sub>. *Evolution &*  
872 *Development*. Wiley Online Library; 2005;7: 289–300.
- 873 29. Smith MS, Turner FR, Raff RA. Nodal expression and heterochrony in the  
874 evolution of dorsal-ventral and left-right axes formation in the direct-developing  
875 sea urchin *Heliocidaris erythrogramma*. *J Exp Zool*. 2008;310B: 609–622.  
876 doi:10.1002/jez.b.21233
- 877 30. Henry JJ, Raff RA. Progressive determination of cell fates along the  
878 dorsoventral axis in the sea urchin *Heliocidaris erythrogramma*. *Roux's archives*  
879 *of developmental biology*. Springer; 1994;204: 62–69.
- 880 31. Byrne M, Koop D, Cisternas P, Strbenac D, Yang JYH, Wray GA. Marine  
881 Genomics. *Marine Genomics*. Elsevier B.V; 2015;24: 41–45.  
882 doi:10.1016/j.margen.2015.05.019
- 883 32. Kauffman JS, Raff RA. Patterning mechanisms in the evolution of derived  
884 developmental life histories: the role of Wnt signaling in axis formation of the  
885 direct-developing sea urchin *Heliocidaris erythrogramma*. *Dev Genes Evol*.  
886 2003;213: 612–624. doi:10.1007/s00427-003-0365-1
- 887 33. Ferkowicz MJ, Raff RA. Wnt gene expression in sea urchin development:  
888 heterochronies associated with the evolution of developmental mode. *Evolution*  
889 *& Development*. Wiley Online Library; 2001;3: 24–33.
- 890 34. Byrne M, Sewell MA. Evolution of maternal lipid provisioning strategies in  
891 echinoids with non-feeding larvae – selection for high quality juveniles. *Mar Ecol*  
892 *Prog Ser*. 2019;: 1–12. doi:10.3354/meps12938
- 893 35. Mos B, Dworjanyn SA. Early metamorphosis is costly and avoided by young, but  
894 physiologically competent, marine larvae. *Mar Ecol Prog Ser*. 2016;559: 117–  
895 129. doi:10.3354/meps11914
- 896 36. Levitan DR. Optimal Egg Size in Marine Invertebrates: Theory and Phylogenetic  
897 Analysis of the Critical Relationship between Egg Size and Development Time in  
898 Echinoids. *The American Naturalist*. 2000;156: 175–192. doi:10.1086/303376
- 899 37. Mercier A, Sewell MA, Hamel J-F. Pelagic propagule duration and  
900 developmental mode: reassessment of a fading link. Duarte CM, editor. *Global*  
901 *Ecology and Biogeography*. 2012;22: 517–530. doi:10.1111/geb.12018
- 902 38. Thompson JR, Erkenbrack EM, Hinman VF, McCauley BS, Petsios E, Bottjer  
903 DJ. Paleogenomics of echinoids reveals an ancient origin for the double-  
904 negative specification of micromeres in sea urchins. *Proceedings of the National*  
905 *Academy of Sciences*. 2017;114: 5870–5877. doi:10.1073/pnas.1610603114



- 906 39. Ransick A, Davidson EH. A complete second gut induced by transplanted  
907 micromeres in the sea urchin embryo. *Science*. 1993;259: 1134–1138.
- 908 40. Hörstadius S. Über die Determination im Verlaufe der Eidechse Seeigeln. *Pubbl*  
909 *Stan Zool Napoli*. 1935;14: 251–479.
- 910 41. Lyons DC, Martik ML, Saunders LR, McClay DR. Specification to  
911 Biomineralization: Following a Single Cell Type as It Constructs a Skeleton.  
912 *Integrative and Comparative Biology*. 2014;54: 723–733. doi:10.1093/icb/icu087
- 913 42. Lyons DC, Kaltenbach SL, McClay DR. Morphogenesis in sea urchin embryos:  
914 linking cellular events to gene regulatory network states. *WIREs Dev Biol*.  
915 2011;1: 231–252. doi:10.1002/wdev.18
- 916 43. Yajima M. A switch in the cellular basis of skeletogenesis in late-stage sea  
917 urchin larvae. *Developmental Biology*. 2007;307: 272–281.  
918 doi:10.1016/j.ydbio.2007.04.050
- 919 44. Koga H, Morino Y, Wada H. The echinoderm larval skeleton as a possible model  
920 system for experimental evolutionary biology. McClay D, Etensohn C, editors.  
921 *genesis*. 2014;52: 186–192. doi:10.1016/j.ydbio.2007.04.050
- 922 45. Gao F, Davidson EH. Transfer of a Large Gene Regulatory Apparatus to a New  
923 Developmental Address in Echinoid Evolution. *Proc Natl Acad Sci USA*. *National*  
924 *Academy of Sciences*; 2008;105: 6091–6096.  
925 doi:10.2307/25461744?ref=search-  
926 gateway:f2daf581f05b8282110824e8aea4f41f
- 927 46. Klueg KM, Harkey MA, Raff RA. Mechanisms of evolutionary changes in timing,  
928 spatial expression, and mRNA processing in the *msp130* gene in a direct-  
929 developing sea urchin, *Heliocidaris erythrogramma*. *Developmental Biology*.  
930 1997;182: 121–133. doi:10.1006/dbio.1996.8431
- 931 47. Sharma T, Etensohn CA. Regulative deployment of the skeletogenic gene  
932 regulatory network during sea urchin development. *Development*. 2011;138:  
933 2581–2590. doi:10.1242/dev.065193
- 934 48. Etensohn CA, Ruffins SW. Mesodermal cell interactions in the sea urchin  
935 embryo: properties of skeletogenic secondary mesenchyme cells. *Development*.  
936 1993;117: 1275–1285.
- 937 49. Erkenbrack EM, Davidson EH, Peter IS. Conserved regulatory state expression  
938 controlled by divergent developmental gene regulatory networks in echinoids.  
939 *Development*. 2018;145: dev167288–11. doi:10.1242/dev.167288
- 940 50. Erkenbrack EM, Ako-Asare K, Miller E, Tekelenburg S, Thompson JR, Romano  
941 L. Ancestral state reconstruction by comparative analysis of a GRN kernel

- 942 operating in echinoderms. *Dev Genes Evol.* 2016;226: 37–45.  
943 doi:10.1242/dev.104331
- 944 51. Erkenbrack EM, Davidson EH. Evolutionary rewiring of gene regulatory network  
945 linkages at divergence of the echinoid subclasses. *Proc Natl Acad Sci USA.*  
946 2015;112: E4075–E4084. doi:10.1016/0012-1606(85)90045-4
- 947 52. Yamazaki A, Kidachi Y, Yamaguchi M, Minokawa T. Larval mesenchyme cell  
948 specification in the primitive echinoid occurs independently of the double-  
949 negative gate. *Development.* 2014;141: 2669–2679. doi:10.1242/dev.104331
- 950 53. Etensohn CA. Alx1, a member of the Cart1/Alx3/Alx4 subfamily of Paired-class  
951 homeodomain proteins, is an essential component of the gene network  
952 controlling skeletogenic fate specification in the sea urchin embryo.  
953 *Development.* 2003;130: 2917–2928. doi:10.1242/dev.00511
- 954 54. Croce JC, McClay DR. Dynamics of Delta/Notch signaling on endomesoderm  
955 segregation in the sea urchin embryo. *Development.* 2009;137: 83–91.  
956 doi:10.1242/dev.044149
- 957 55. Röttinger E, Croce J, Lhomond G, Besnardeau L, Gache C, Lepage T. Nemo-  
958 like kinase (NLK) acts downstream of Notch/Delta signalling to downregulate  
959 TCF during mesoderm induction in the sea urchin embryo. *Development.*  
960 2006;133: 4341–4353. doi:10.1242/dev.02603
- 961 56. Röttinger E. A Raf/MEK/ERK signaling pathway is required for development of  
962 the sea urchin embryo micromere lineage through phosphorylation of the  
963 transcription factor Ets. *Development.* 2004;131: 1075–1087.  
964 doi:10.1242/dev.01000
- 965 57. Fernandez-Serra M, Consales C, Livigni A, Arnone MI. Role of the ERK-  
966 mediated signaling pathway in mesenchyme formation and differentiation in the  
967 sea urchin embryo. *Developmental Biology.* 2004;268: 384–402.  
968 doi:10.1016/j.ydbio.2003.12.029
- 969 58. Czarkwiani A, Ferrario C, Dylus DV, Sugni M, Oliveri P. Skeletal regeneration in  
970 the brittle star *Amphiura filiformis*. *Frontiers in Zoology.* 3rd ed. 2016;13: 525.  
971 doi:10.1021/cr0783479
- 972 59. Gao F, Thompson JR, Petsios E, Erkenbrack E, Moats RA, Bottjer DJ, et al.  
973 Juvenile skeletogenesis in anciently diverged sea urchin clades. *Developmental*  
974 *Biology.* 2015;400: 148–158. doi:10.1016/j.ydbio.2015.01.017
- 975 60. McCauley BS, Wright EP, Exner C, Kitazawa C, Hinman VF. Development of an  
976 embryonic skeletogenic mesenchyme lineage in a sea cucumber reveals the  
977 trajectory of change for the evolution of novel structures in echinoderms.  
978 *EvoDevo.* *EvoDevo;* 2012;3: 1–1. doi:10.1186/2041-9139-3-17

- 979 61. Rafiq K, Shashikant T, McManus CJ, Etensohn CA. Genome-wide analysis of  
980 the skeletogenic gene regulatory network of sea urchins. *Development*.  
981 2014;141: 2542–2542. doi:10.1242/dev.112763
- 982 62. Saunders LR, McClay DR. Sub-circuits of a gene regulatory network control a  
983 developmental epithelial-mesenchymal transition. 2014;141: 1503–1513.  
984 doi:10.1242/dev.101436
- 985 63. Kurokawa D, Kitajima T, (null) KM-N, Amemiya S, Shimada H, Akasaka K.  
986 HpEts, an ets-related transcription factor implicated in primary mesenchyme cell  
987 differentiation in the sea urchin embryo. *Mechanisms of Development*. 80: 41–  
988 52.
- 989 64. Minokawa T. Comparative studies on the skeletogenic mesenchyme of  
990 echinoids. *Developmental Biology*. 2017;427: 212–218.  
991 doi:10.1016/j.ydbio.2016.11.011
- 992 65. Dylus DV, Czarkwiani A, Stångberg J, Ortega-Martinez O, Dupont S, Oliveri P.  
993 Large-scale gene expression study in the ophiuroid *Amphiura filiformis* provides  
994 insights into evolution of gene regulatory networks. *EvoDevo*. 2016;7: 5955.  
995 doi:10.1016/j.gep.2010.04.002
- 996 66. Koga H, Fujitani H, Morino Y, Miyamoto N, Tsuchimoto J, Shibata TF, et al.  
997 Experimental Approach Reveals the Role of *alx1* in the Evolution of the  
998 Echinoderm Larval Skeleton. Schubert M, editor. *PLoS ONE*. 2016;11:  
999 e0149067. doi:10.1371/journal.pone.0149067.s012
- 1000 67. Yamazaki A, Minokawa T. Gene Expression Patterns. *Gene Expression*  
1001 *Patterns*. Elsevier B.V; 2015;17: 87–97. doi:10.1016/j.gep.2015.03.003
- 1002 68. Khor JM, Etensohn CA. Functional divergence of paralogous transcription  
1003 factors supported the evolution of biomineralization in echinoderms. *eLife*.  
1004 2017;6: 7001. doi:10.7554/elife.32728
- 1005 69. Erkenbrack EM, Thompson JR. Cell type phylogenetics informs the evolutionary  
1006 origin of echinoderm larval skeletogenic cell identity. *Commun Biol*. 2019;2:  
1007 744–13. doi:10.1038/s42003-019-0417-3
- 1008 70. McCauley BS, Weideman EP, Hinman VF. A conserved gene regulatory  
1009 network subcircuit drives different developmental fates in the vegetal pole of  
1010 highly divergent echinoderm embryos. 2010;340: 200–208.  
1011 doi:10.1016/j.ydbio.2009.11.020
- 1012 71. Hinman VF, Nguyen A, Davidson EH. Caught in the evolutionary act: Precise  
1013 cis-regulatory basis of difference in the organization of gene networks of sea  
1014 stars and sea urchins. *Developmental Biology*. 2007;312: 584–595.  
1015 doi:10.1016/j.ydbio.2007.09.006

- 1016 72. Oliveri P, Tu Q, Davidson EH. Global regulatory logic for specification of an  
1017 embryonic cell lineage. *Proceedings of the National Academy of Sciences*.  
1018 2008;105: 5955–5962. doi:10.1073/pnas.0711220105
- 1019 73. Fuchikami TEA. T-brain homologue (HpTb) is involved in the archenteron  
1020 induction signals of micromere descendant cells in the sea urchin embryo.  
1021 2002;: 1–12.
- 1022 74. Cheng X, Lyons DC, Socolar JES, McClay DR. *Developmental Biology*.  
1023 *Developmental Biology*. Elsevier; 2014;391: 147–157.  
1024 doi:10.1016/j.ydbio.2014.04.015
- 1025 75. Revilla-i-Domingo R, Oliveri P, Davidson EH. A missing link in the sea urchin  
1026 embryo gene regulatory network: hesC and the double-negative specification of  
1027 micromeres. *Proceedings of the National Academy of Sciences*. 2007;104:  
1028 12383–12388. doi:10.1073/pnas.0705324104
- 1029 76. Yamazaki A, Kawabata R, Shiomi K, Amemiya S, Sawaguchi M, Mitsunaga-  
1030 Nakatsubo K, et al. The micro1 gene is necessary and sufficient for micromere  
1031 differentiation and mid/hindgut-inducing activity in the sea urchin embryo. *Dev*  
1032 *Genes Evol*. 2005;215: 450–459. doi:10.1007/s00427-005-0006-y
- 1033 77. Oliveri P, Davidson EH, McClay DR. Activation of pmar1 controls specification of  
1034 micromeres in the sea urchin embryo. *Developmental Biology*. 2003;258: 32–43.  
1035 doi:10.1016/S0012-1606(03)00108-8
- 1036 78. Cavalieri V, Geraci F, Spinelli G. Diversification of spatiotemporal expression  
1037 and copy number variation of the echinoid hbox12/pmar1/micro1 multigene  
1038 family. Schubert M, editor. *PLoS ONE*. 2017;12: e0174404–21.  
1039 doi:10.1371/journal.pone.0174404
- 1040 79. Rho HK, McClay DR. The control of foxN2/3 expression in sea urchin embryos  
1041 and its function in the skeletogenic gene regulatory network. *Development*.  
1042 2011;138: 937–945. doi:10.1242/dev.058396
- 1043 80. Tu Q, Brown CT, Davidson EH, Oliveri P. Sea urchin Forkhead gene family:  
1044 Phylogeny and embryonic expression. *Developmental Biology*. 2006;300: 49–  
1045 62. doi:10.1016/j.ydbio.2006.09.031
- 1046 81. Rafiq K, Cheers MS, Etensohn CA. The genomic regulatory control of skeletal  
1047 morphogenesis in the sea urchin. 2012;139: 579–590. doi:10.1242/dev.073049
- 1048 82. Loh KM, van Amerongen R, Nusse R. Generating Cellular Diversity and Spatial  
1049 Form: Wnt Signaling and the Evolution of Multicellular Animals. *Developmental*  
1050 *Cell*. Elsevier Inc; 2016;38: 643–655. doi:10.1016/j.devcel.2016.08.011

- 1051 83. Wikramanayake AH, Huang L, Klein WH. beta-Catenin is essential for patterning  
1052 the maternally specified animal-vegetal axis in the sea urchin embryo.  
1053 Proceedings of the National Academy of Sciences. 1998;95: 9343–9348.
- 1054 84. Goldstein B, Freeman G. Axis specification in animal development. Bioessays.  
1055 Wiley Online Library; 1997;19: 105–116.
- 1056 85. Logan CY, Miller JR, Ferkowicz MJ, McClay DR. The role of micromere  
1057 signaling in Notch activation and mesoderm specification during sea urchin  
1058 embryogenesis. Development. 1999;126: 5255–5265. Available:  
1059 [http://eutils.ncbi.nlm.nih.gov/entrez/eutils/elink.fcgi?dbfrom=pubmed&id=105560](http://eutils.ncbi.nlm.nih.gov/entrez/eutils/elink.fcgi?dbfrom=pubmed&id=10556051&retmode=ref&cmd=prlinks)  
1060 [51&retmode=ref&cmd=prlinks](http://eutils.ncbi.nlm.nih.gov/entrez/eutils/elink.fcgi?dbfrom=pubmed&id=10556051&retmode=ref&cmd=prlinks)
- 1061 86. Cui M, Siriwon N, Li E, Davidson EH, Peter IS. Specific functions of the Wnt  
1062 signaling system in gene regulatory networks throughout the early sea urchin  
1063 embryo. Proc Natl Acad Sci USA. 2014;111: E5029–E5038.  
1064 doi:10.1242/dev.033910
- 1065 87. Wray GA, Raff RA. Novel origins of lineage founder cells in the direct-developing  
1066 sea urchin *Heliocidaris erythrogramma*. Developmental Biology. 1990;141: 41–  
1067 54. doi:10.1016/0012-1606(90)90100-w
- 1068 88. Minokawa T, Rast JP, Arenas-Mena C, Franco CB, Davidson EH. Expression  
1069 patterns of four different regulatory genes that function during sea urchin  
1070 development. Gene Expression Patterns. 2004;4: 449–456.  
1071 doi:10.1016/j.modgep.2004.01.009
- 1072 89. Sweet HC, Gehring M, Etensohn C. LvDelta is a mesoderm-inducing signal in  
1073 the sea urchin embryo and can endow blastomeres with organizer-like  
1074 properties. Dev. 2002;129: 1945–1955.
- 1075 90. Sweet HC, Hodor PG, Etensohn CA. The role of micromere signaling in Notch  
1076 activation and mesoderm specification during sea urchin embryogenesis.  
1077 Development. 1999;126: 5255–5265.
- 1078 91. Sherwood DR, Development DM, 1999. LvNotch signaling mediates secondary  
1079 mesenchyme specification in the sea urchin embryo. Dev. 1999.
- 1080 92. Materna SC, Davidson EH. A comprehensive analysis of Delta signaling in pre-  
1081 gastrular sea urchin embryos. Developmental Biology. 2012;364: 77–87.  
1082 doi:10.1016/j.ydbio.2012.01.017
- 1083 93. McClay DR, Peterson RE, Range RC, Winter-Vann AM, Ferkowicz MJ. A  
1084 micromere induction signal is activated by beta-catenin and acts through notch  
1085 to initiate specification of secondary mesenchyme cells in the sea urchin  
1086 embryo. Development. 2000;127: 5113–5122.



- 1087 94. Ransick A, Davidson EH. Cis-regulatory logic driving glial cells missing: Self-  
1088 sustaining circuitry in later embryogenesis. *Developmental Biology*. 2012;364:  
1089 259–267. doi:10.1016/j.ydbio.2012.02.003
- 1090 95. Ransick A, Davidson EH. cis-regulatory processing of Notch signaling input to  
1091 the sea urchin glial cells missing gene during mesoderm specification.  
1092 *Developmental Biology*. 2006;297: 587–602. doi:10.1016/j.ydbio.2006.05.037
- 1093 96. Erkenbrack EM. Notch-mediated lateral inhibition is an evolutionarily conserved  
1094 mechanism patterning the ectoderm in echinoids. *Dev Genes Evol*. 2017;228:  
1095 1–11. doi:10.1007/s00427-017-0599-y
- 1096 97. Yamazaki A, Minokawa T. Roles of hesC and gcm in echinoid larval  
1097 mesenchyme cell development. *Development, Growth & Differentiation*.  
1098 2016;58: 315–326. doi:10.1242/dev.104331
- 1099 98. Revilla-i-Domingo R, Minokawa T, Davidson EH. R11: a cis-regulatory node of  
1100 the sea urchin embryo gene network that controls early expression of SpDelta in  
1101 micromeres. *Developmental Biology*. 2004;274: 438–451.  
1102 doi:10.1016/j.ydbio.2004.07.008
- 1103 99. Sharma T, Etensohn CA. Activation of the skeletogenic gene regulatory network  
1104 in the early sea urchin embryo. *Development*. 2010;137: 1149–1157.  
1105 doi:10.1242/dev.048652
- 1106 100. Bessodes N, Haillet E, Duboc V, Röttinger E, Lahaye F, Lepage T. Reciprocal  
1107 Signaling between the Ectoderm and a Mesendodermal Left-Right Organizer  
1108 Directs Left-Right Determination in the Sea Urchin Embryo. Hamada H, editor.  
1109 *PLoS Genet*. 2012;8: e1003121. doi:10.1371/journal.pgen.1003121.s007
- 1110 101. Taylor E, Heyland A. Thyroid Hormones Accelerate Initiation of Skeletogenesis  
1111 via MAPK (ERK1/2) in Larval Sea Urchins (*Strongylocentrotus purpuratus*).  
1112 *Front Endocrinol*. 2018;9: 335–16. doi:10.3389/fendo.2018.00439
- 1113 102. Etensohn CA, Kitazawa C, Cheers MS, Leonard JD, Sharma T. Gene  
1114 regulatory networks and developmental plasticity in the early sea urchin embryo:  
1115 alternative deployment of the skeletogenic gene regulatory network.  
1116 *Development*. 2007;134: 3077–3087. doi:10.1242/dev.009092
- 1117 103. Yajima M, Kiyomoto M. Study of Larval and Adult Skeletogenic Cells in  
1118 Developing Sea Urchin Larvae. *Biological Bulletin. Marine Biological Laboratory*;  
1119 2006;211: 183–192. doi:10.2307/4134592?refreqid=search-  
1120 gateway:e360f55686276200fcf0a1ac07436b10
- 1121 104. Yajima M. Evolutionary modification of mesenchyme cells in sand dollars in the  
1122 transition from indirect to direct development. *Evolution & Development*. 2007;9:  
1123 257–266. doi:10.1111/j.1525-142x.2007.00158.x

- 1124 105. Iijima M, Ishizuka Y, Nakajima Y, Amemiya S, Minokawa T. Evolutionary  
1125 modification of specification for the endomesoderm in the direct developing  
1126 echinoid *Peronella japonica*: loss of the endomesoderm-inducing signal  
1127 originating from micromeres. *Dev Genes Evol.* 2009;219: 235–247.  
1128 doi:10.1007/s00427-009-0286-8
- 1129 106. Wahl ME, Hahn J, Gora K, Davidson EH, Oliveri P. The cis-regulatory system of  
1130 the *tbrain* gene: Alternative use of multiple modules to promote skeletogenic  
1131 expression in the sea urchin embryo. *Developmental Biology.* Elsevier Inc;  
1132 2009;335: 428–441. doi:10.1016/j.ydbio.2009.08.005
- 1133 107. Reinardy HC, Emerson CE, Manley JM, Bodnar AG. Tissue Regeneration and  
1134 Biomineralization in Sea Urchins: Role of Notch Signaling and Presence of Stem  
1135 Cell Markers. Fugmann SD, editor. *PLoS ONE.* 2015;10: e0133860–15.  
1136 doi:10.1371/journal.pone.0133860
- 1137 108. McKee TD, Loureiro RMB, Dumin JA, Zarayskiy V, Tate B. An improved cell-  
1138 based method for determining the  $\gamma$ -secretase enzyme activity against both  
1139 Notch and APP substrates. *Journal of Neuroscience Methods.* Elsevier B.V;  
1140 2013;213: 14–21. doi:10.1016/j.jneumeth.2012.11.011
- 1141 109. Martone RL, Zhou H, Atchison K, Comery T, Xu JZ, Huang X, et al. Begacestat  
1142 (GSI-953): A Novel, Selective Thiophene Sulfonamide Inhibitor of Amyloid  
1143 Precursor Protein  $\gamma$ -Secretase for the Treatment of Alzheimer's Disease. *Journal*  
1144 *of Pharmacology and Experimental Therapeutics.* 2009;331: 598–608.  
1145 doi:10.1124/jpet.109.152975
- 1146 110. Li J-Y, Li R-J, Wang H-D.  $\gamma$ -Secretase inhibitor DAPT sensitizes t-AUCB-  
1147 induced apoptosis of human glioblastoma cells in vitro via blocking the p38  
1148 MAPK/MAPKAPK2/ Hsp27 pathway. 2014;35: 825–831.  
1149 doi:10.1038/aps.2013.195
- 1150 111. Curry CL, Reed LL, Golde TE, Miele L, Nickoloff BJ, Foreman KE. Gamma  
1151 secretase inhibitor blocks Notch activation and induces apoptosis in Kaposi's  
1152 sarcoma tumor cells. *Oncogene.* 2005;24: 6333–6344.  
1153 doi:10.1038/sj.onc.1208783
- 1154 112. D TR. Fixation and preservation of molluscan zooplankton. *Monograph on*  
1155 *Oceanographic Methodology.* 1976.
- 1156 113. Emlert RB. Morphological Evolution of Newly Metamorphosed Sea Urchins—A  
1157 Phylogenetic and Functional Analysis. *Integrative and Comparative Biology.*  
1158 2010;50: 571–588. doi:10.1093/icb/icq073
- 1159 114. Wessel GM, McClay DR. Two embryonic, tissue-specific molecules identified by  
1160 a double-label immunofluorescence technique for monoclonal antibodies.

- 1161           Journal of Histochemistry & Cytochemistry. 1986;34: 703–706.  
1162           doi:10.1177/34.6.3084626
- 1163   115.   Leaf DS, Anstrom JA, Chin JE, Harkey MA, Showman RM, Raff RA. Antibodies  
1164           to a fusion protein identify a cDNA clone encoding msp130, a primary  
1165           mesenchyme-specific cell surface protein of the sea urchin embryo.  
1166           Developmental Biology. 1987;121: 29–40.
- 1167   116.   Robinson MD, McCarthy DJ, Smyth GK. edgeR: a Bioconductor package for  
1168           differential expression analysis of digital gene expression data. Bioinformatics.  
1169           2009;26: 139–140. doi:10.1093/bioinformatics/btp616
- 1170   117.   Conesa A, Nueda MJ, Ferrer A, Talon M. maSigPro: a method to identify  
1171           significantly differential expression profiles in time-course microarray  
1172           experiments. Bioinformatics. 2006;22: 1096–1102.  
1173           doi:10.1093/bioinformatics/btl056
- 1174



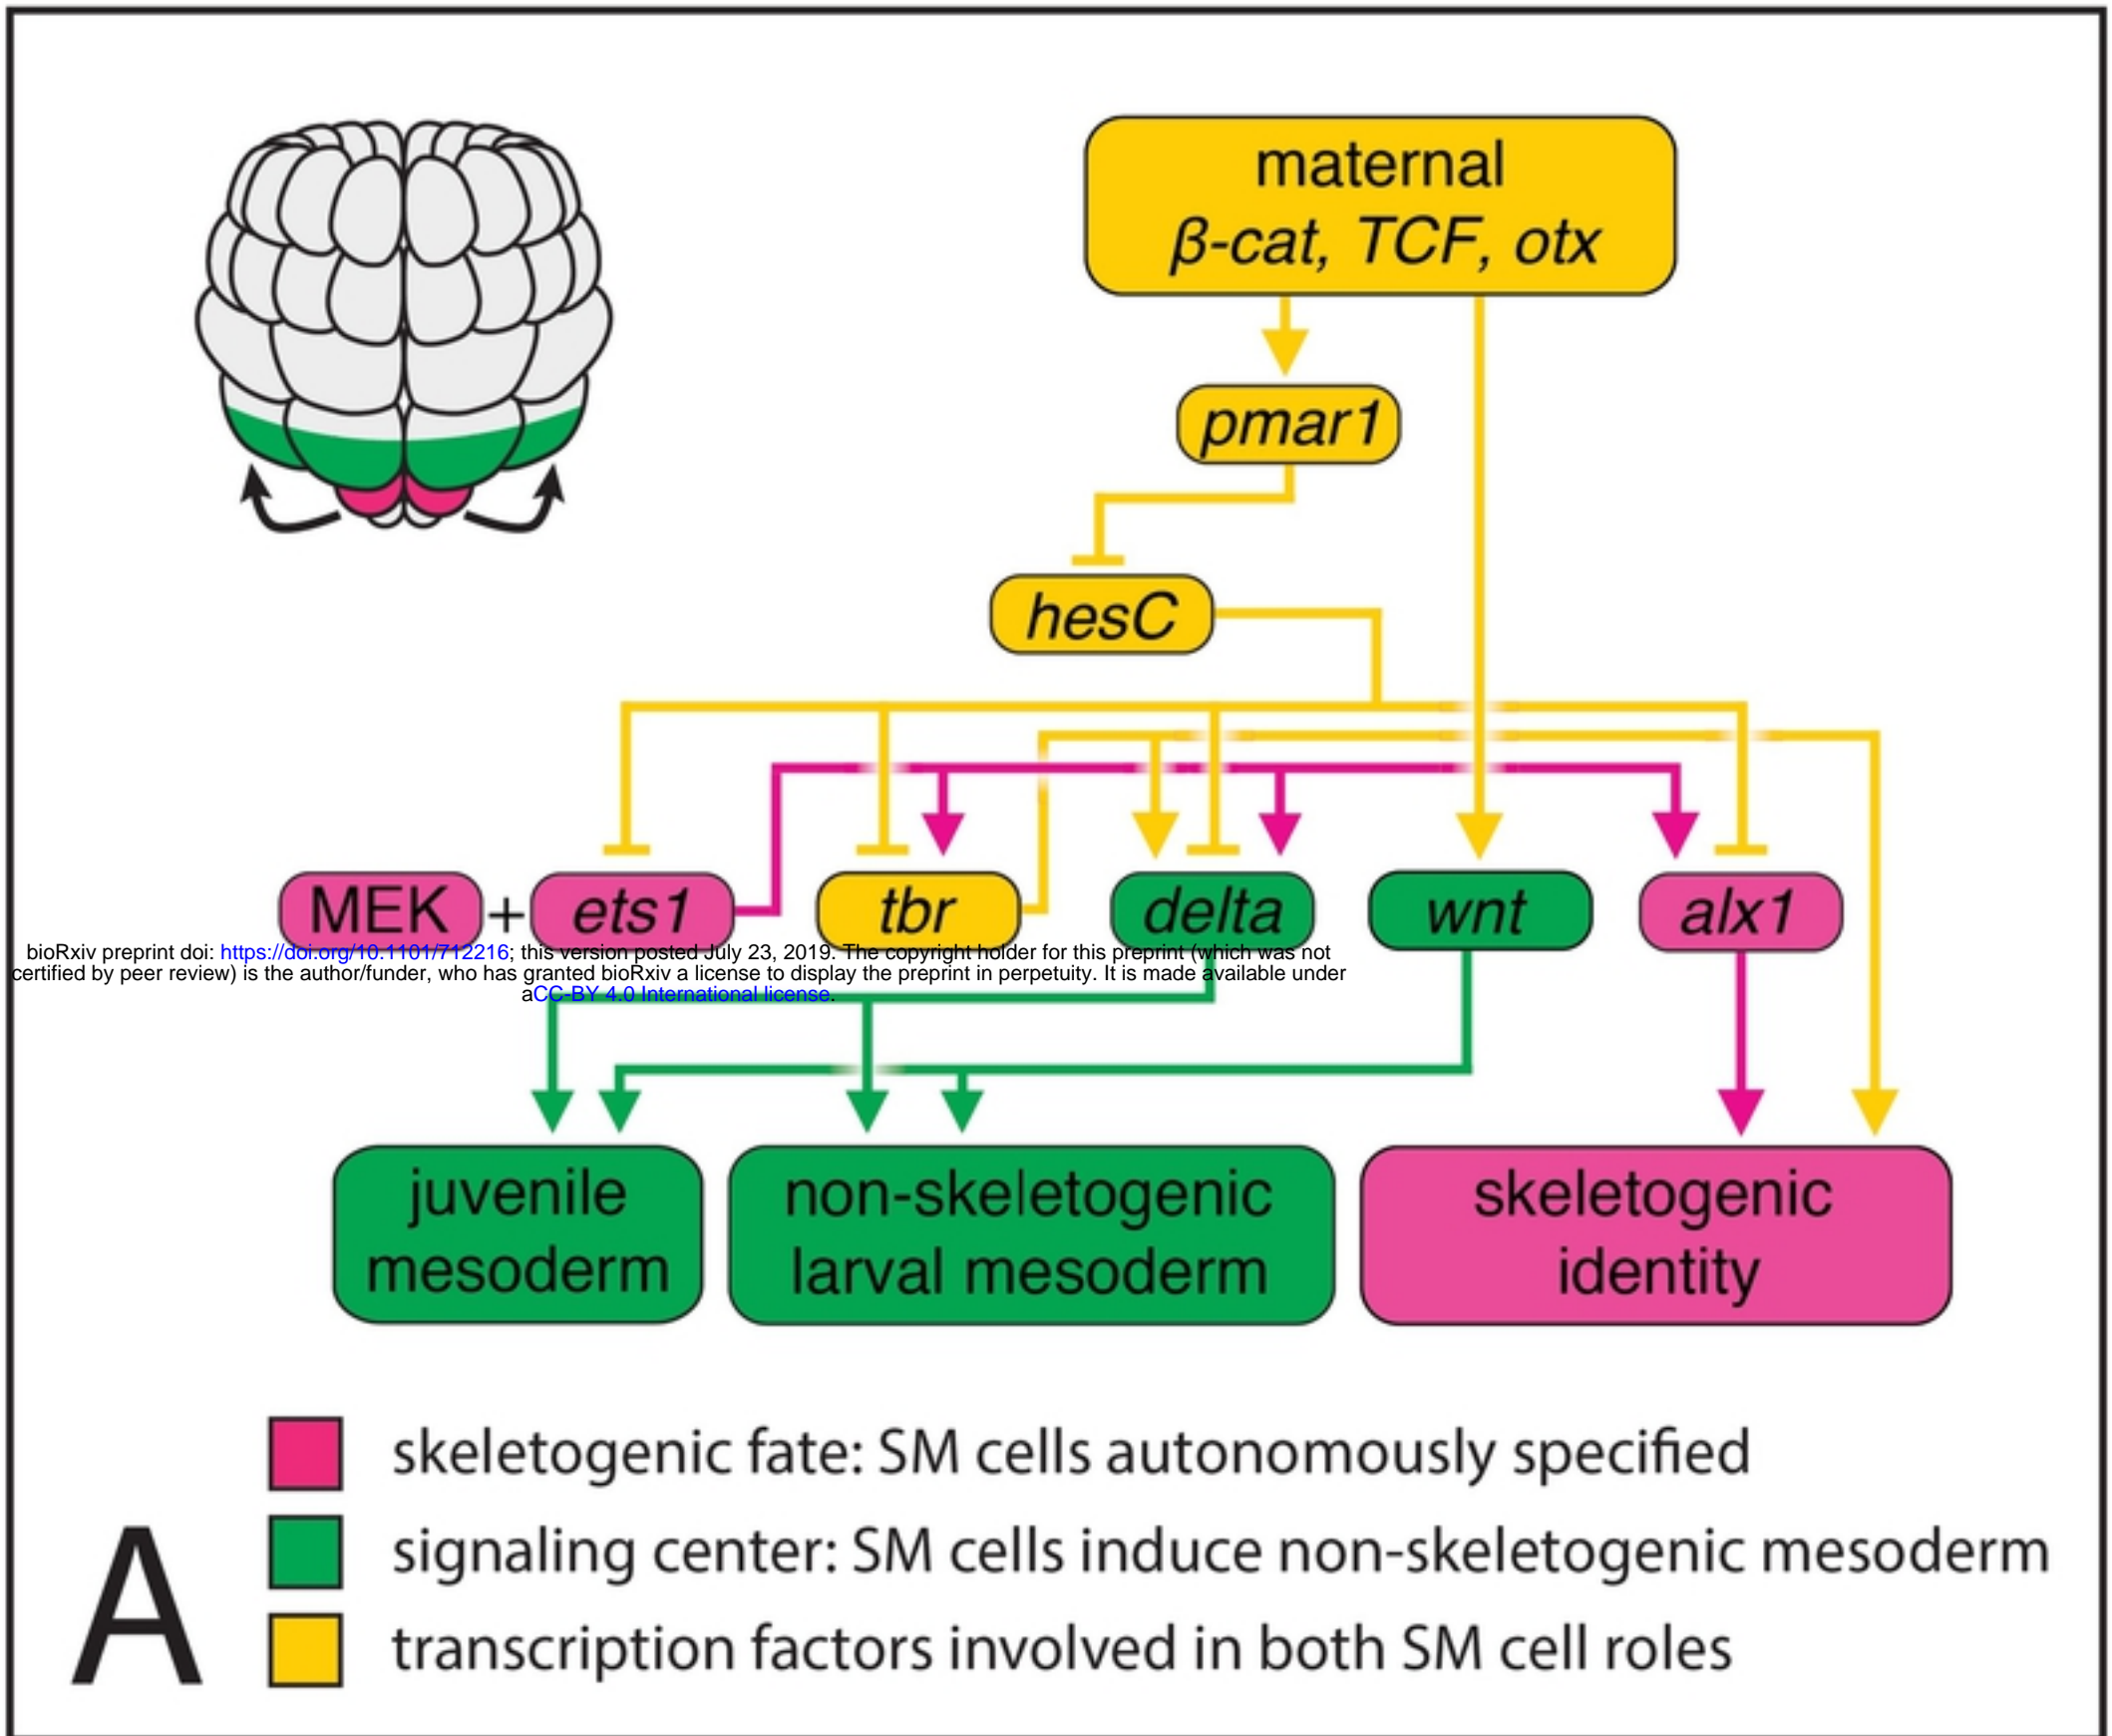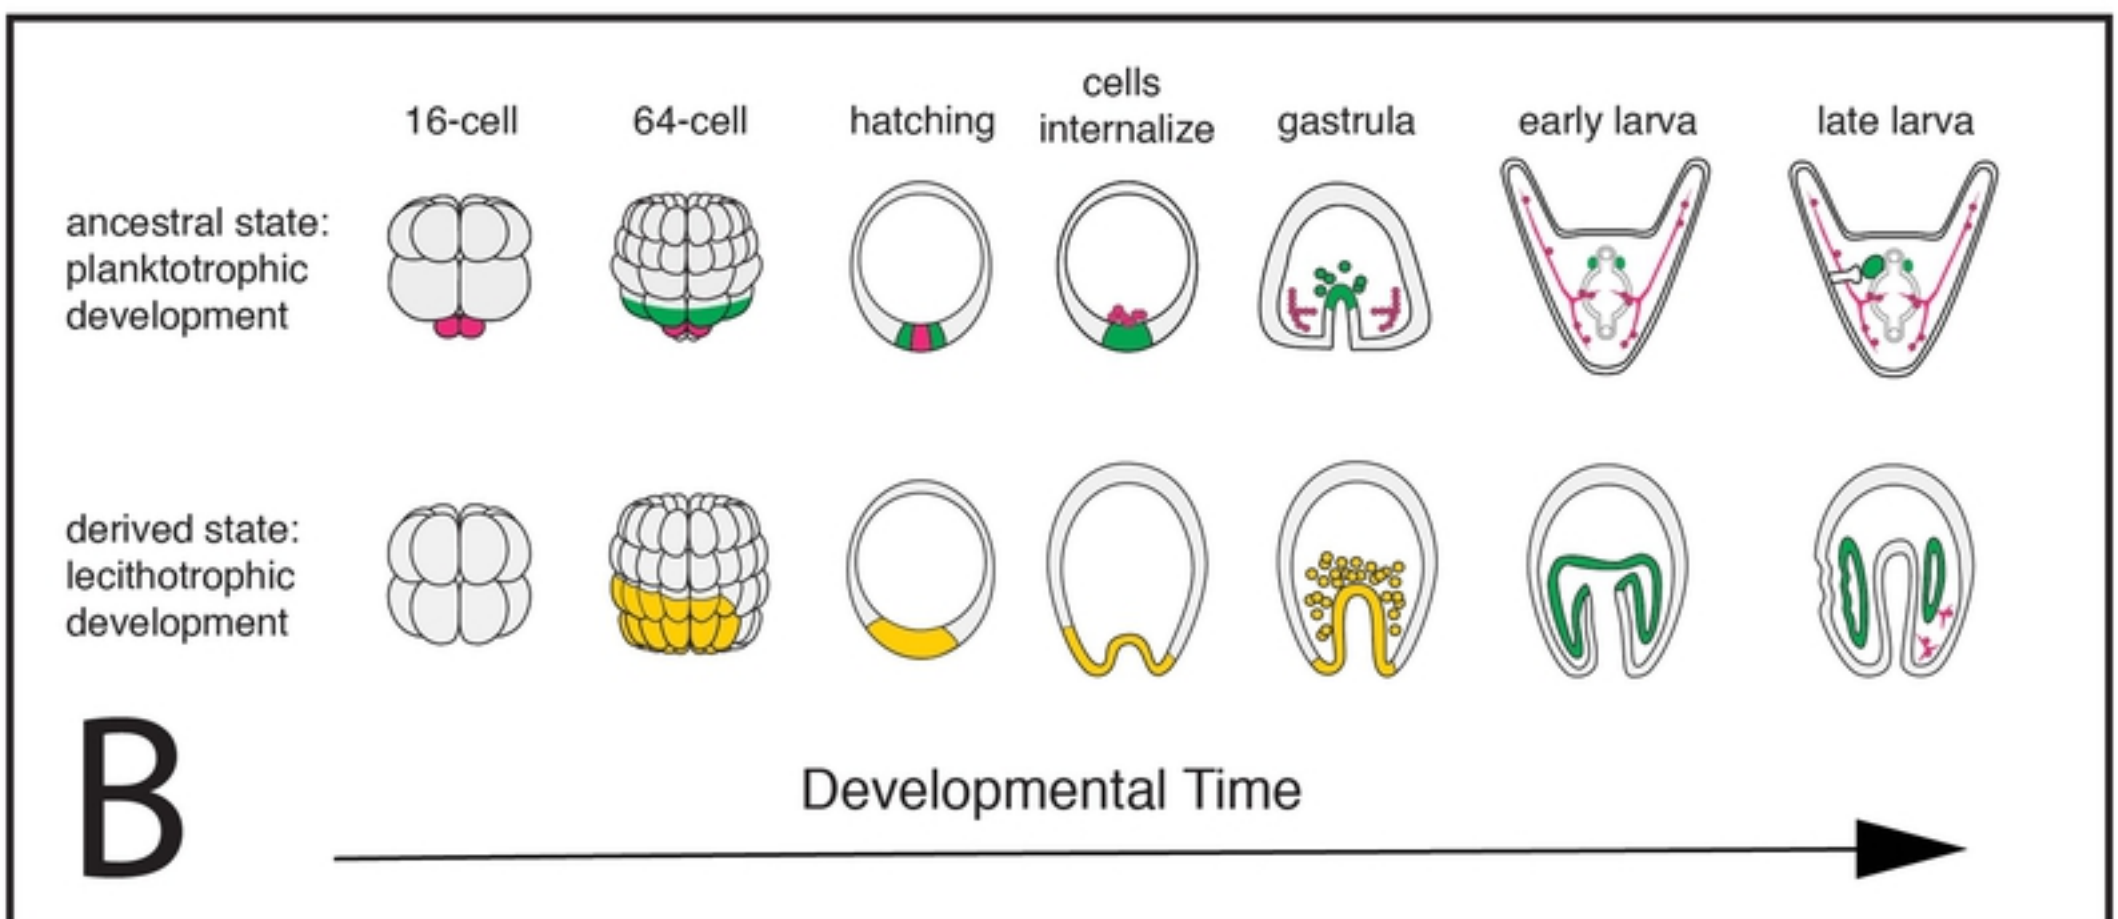

Figure 1 GRN intro

# Developmental Time

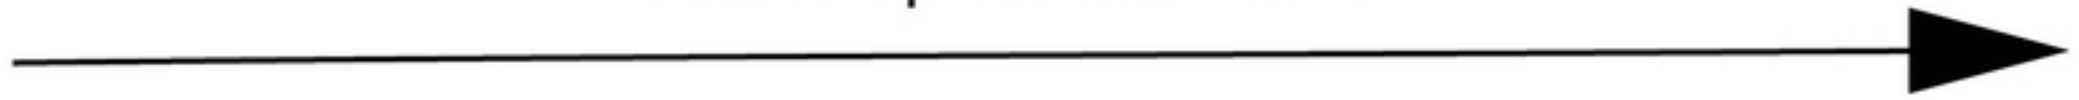

bioRxiv preprint doi: <https://doi.org/10.1101/712216>; this version posted July 23, 2019. The copyright holder for this preprint (which was not certified by peer review) is the author/funder, who has granted bioRxiv a license to display the preprint in perpetuity. It is made available under aCC-BY 4.0 International license.

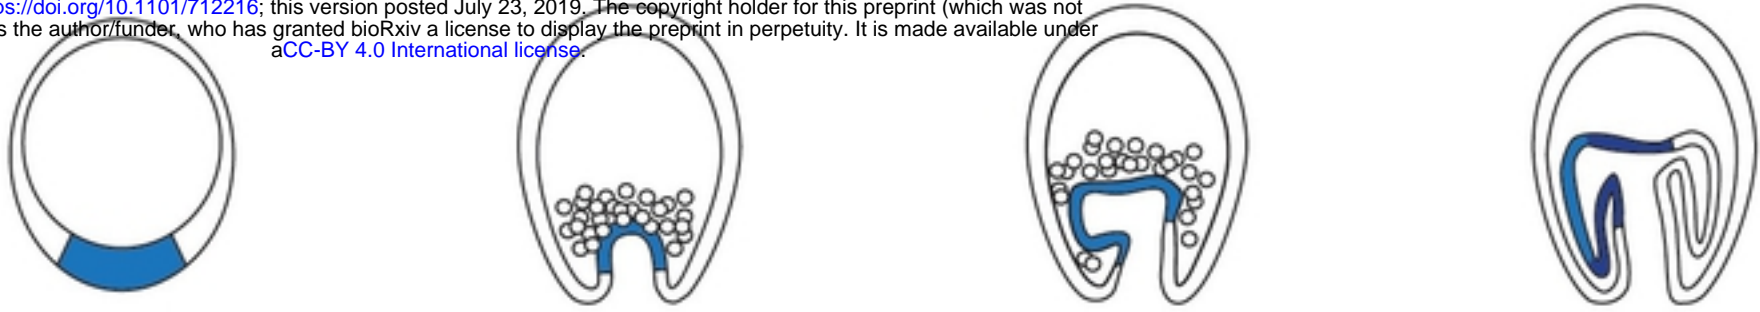

## A

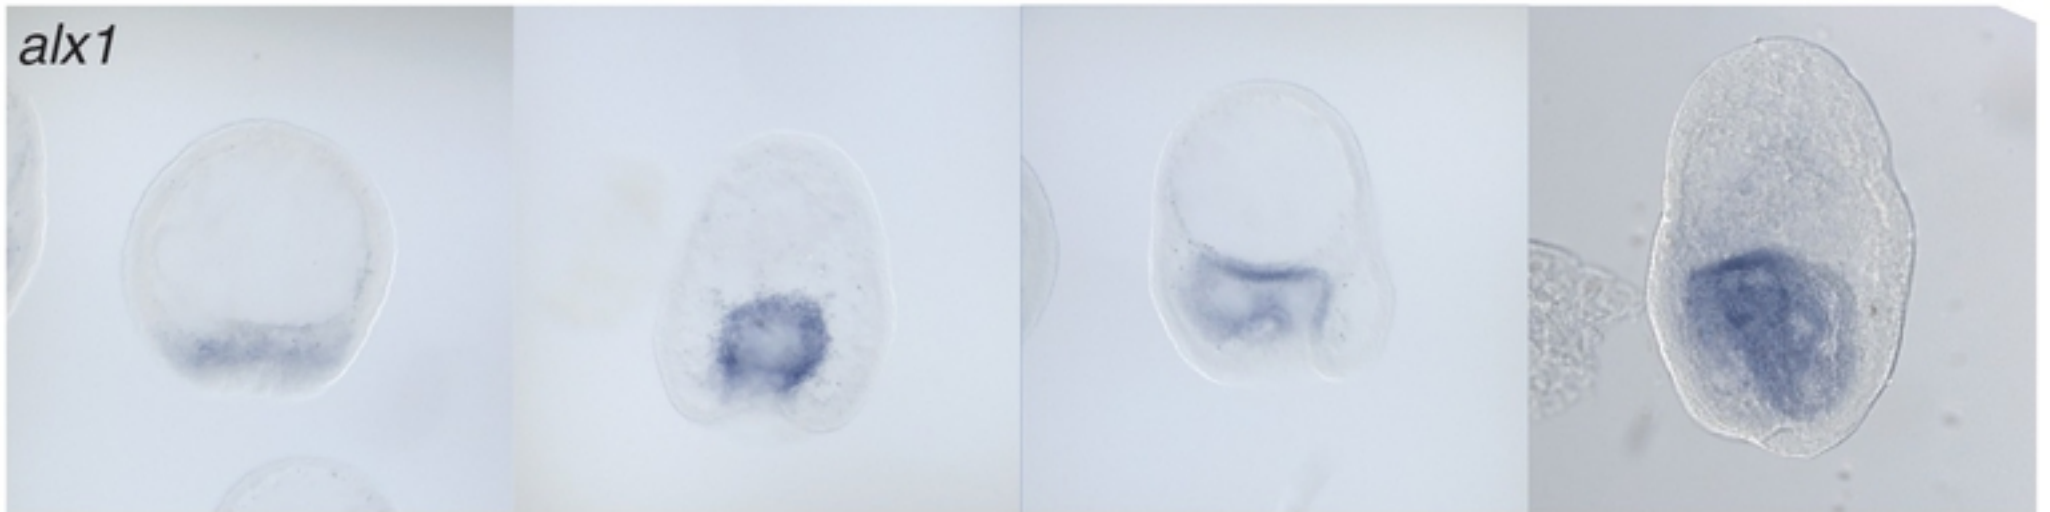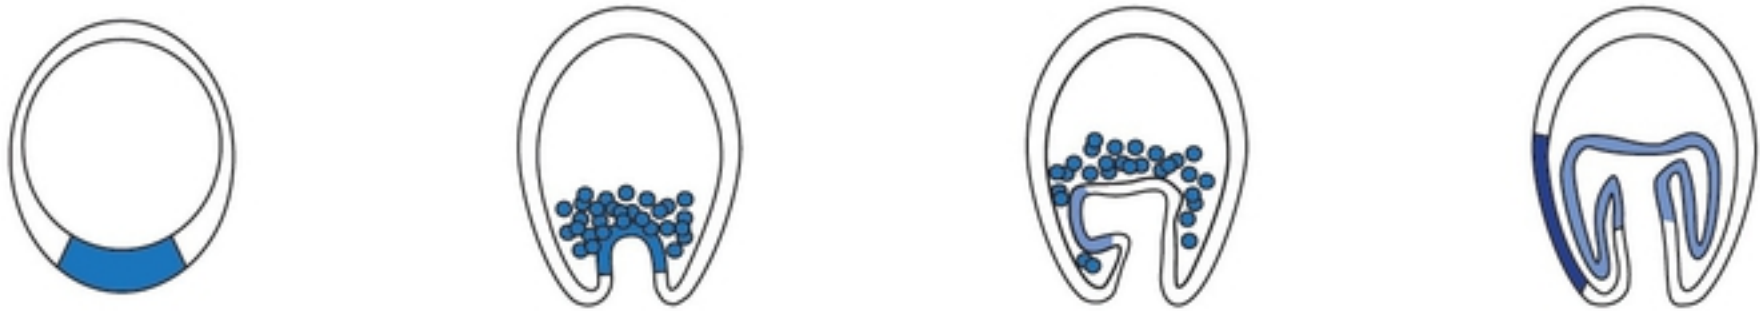

## B

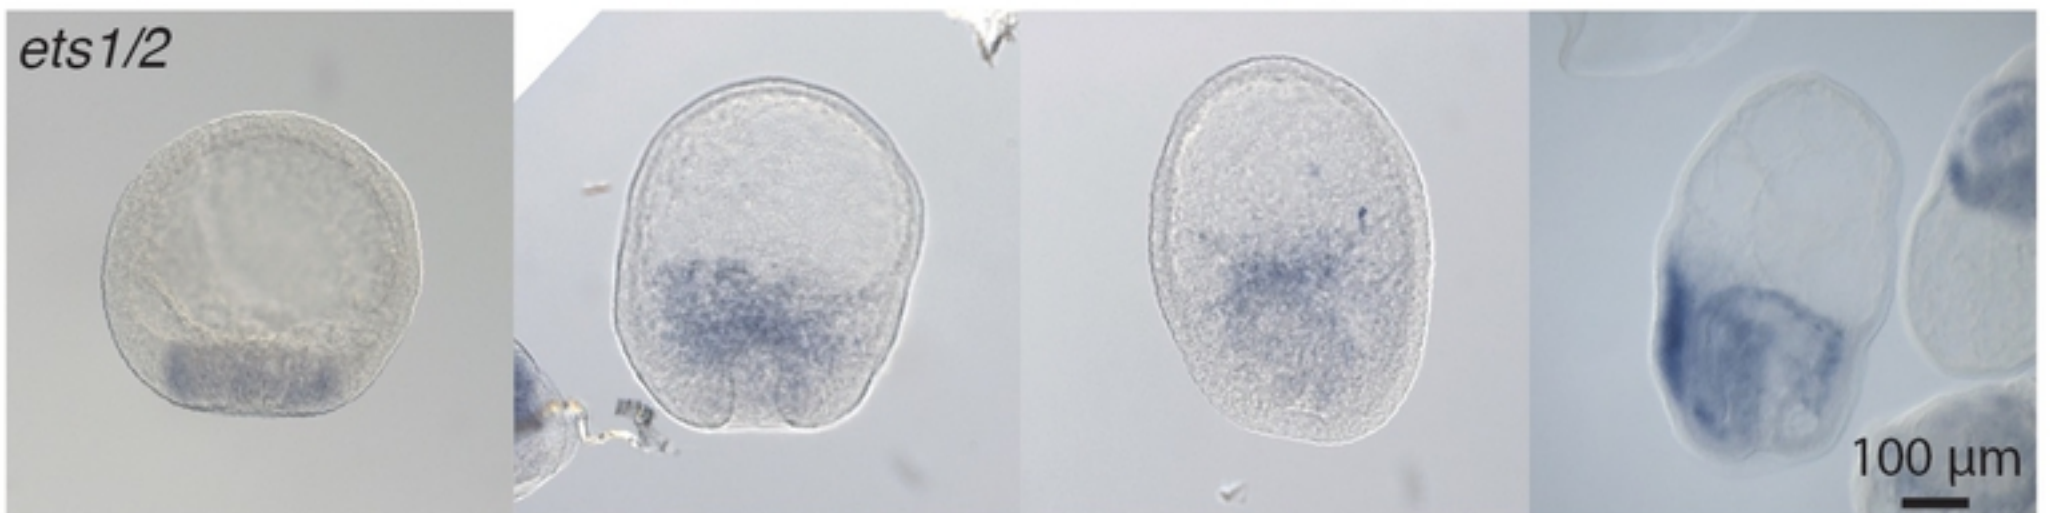

Figure 2 Alx1 expression



control

alx1 KD

bioRxiv preprint doi: <https://doi.org/10.1101/712216>; this version posted July 23, 2019. The copyright holder for this preprint (which was not certified by peer review) is the author/funder, who has granted bioRxiv a license to display the preprint in perpetuity. It is made available under aCC-BY 4.0 International license.

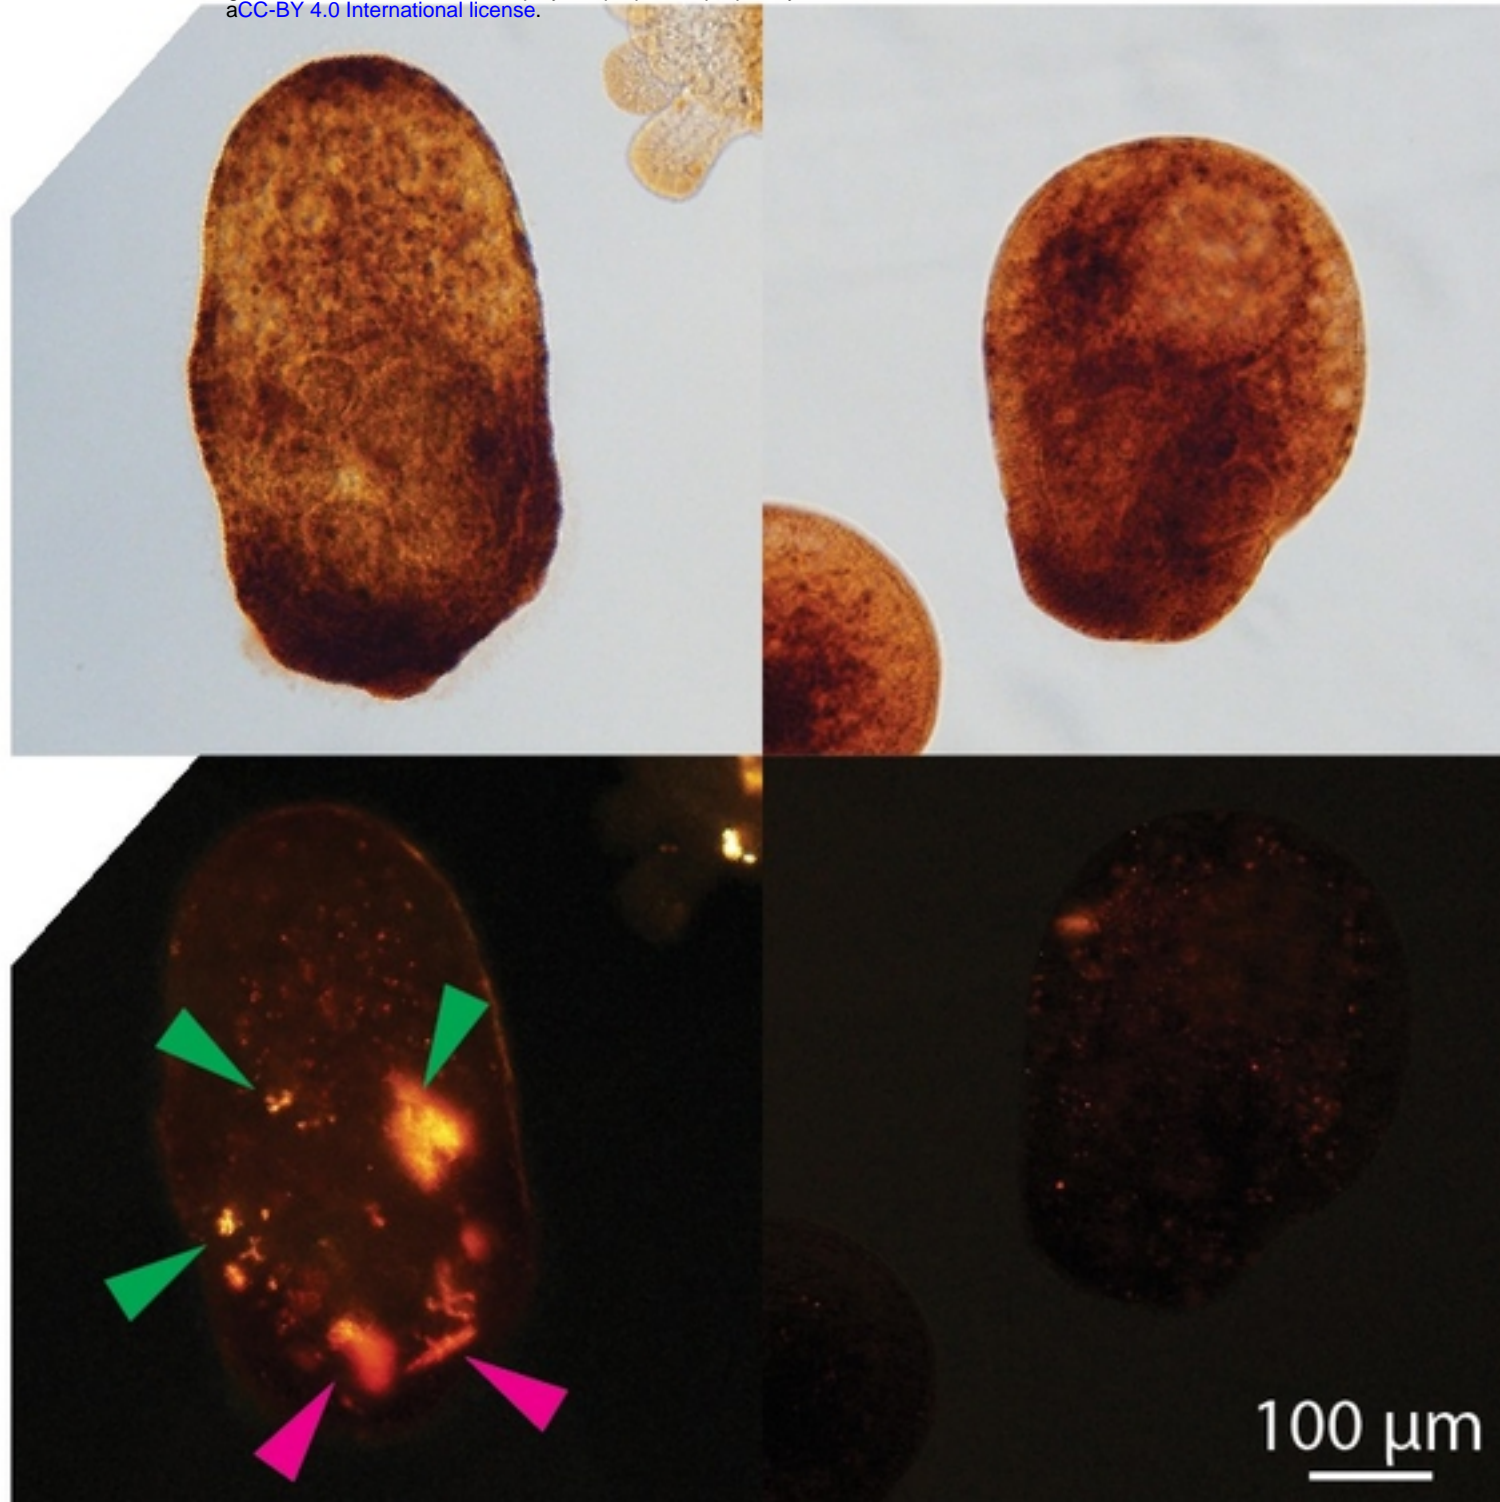

Figure 3 Alx1 KD

Developmental Time →

*H. tuberculata*  
(planktotroph,  
ancestral GRN)

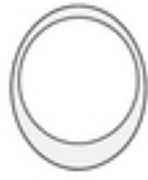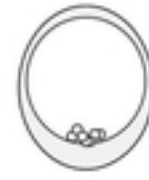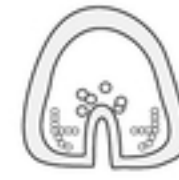

*H. erythrogramma*  
(lecithotroph,  
derived GRN)

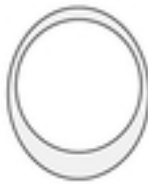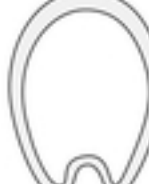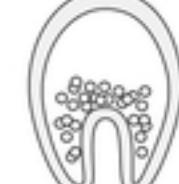

*H.t. ets1/2*

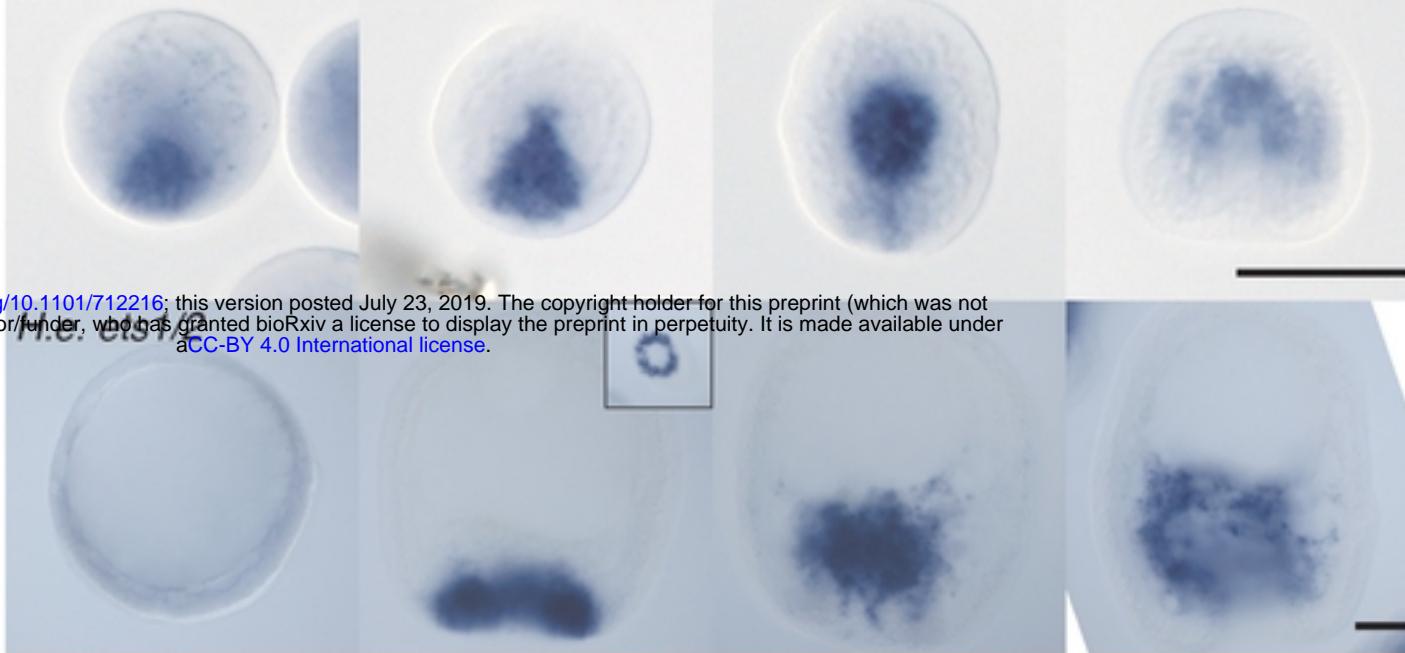

A

*H.t. tbr*

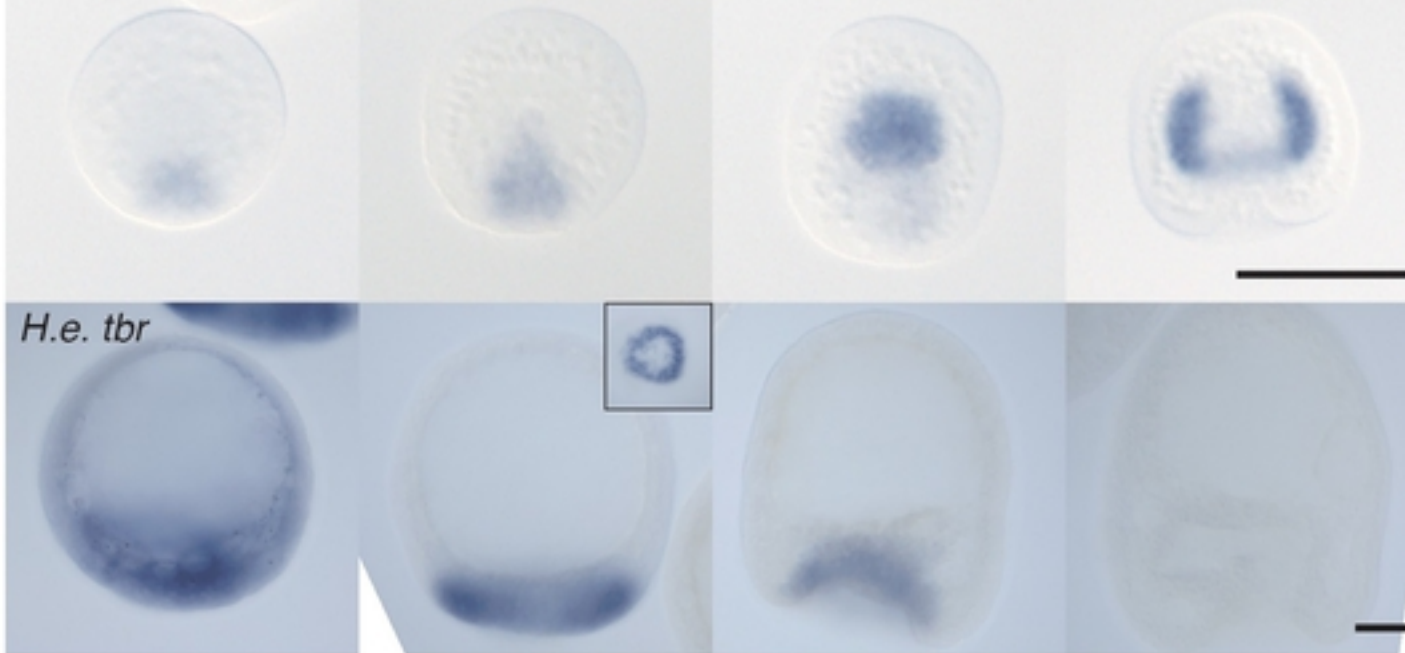

B

*H.e. tbr*

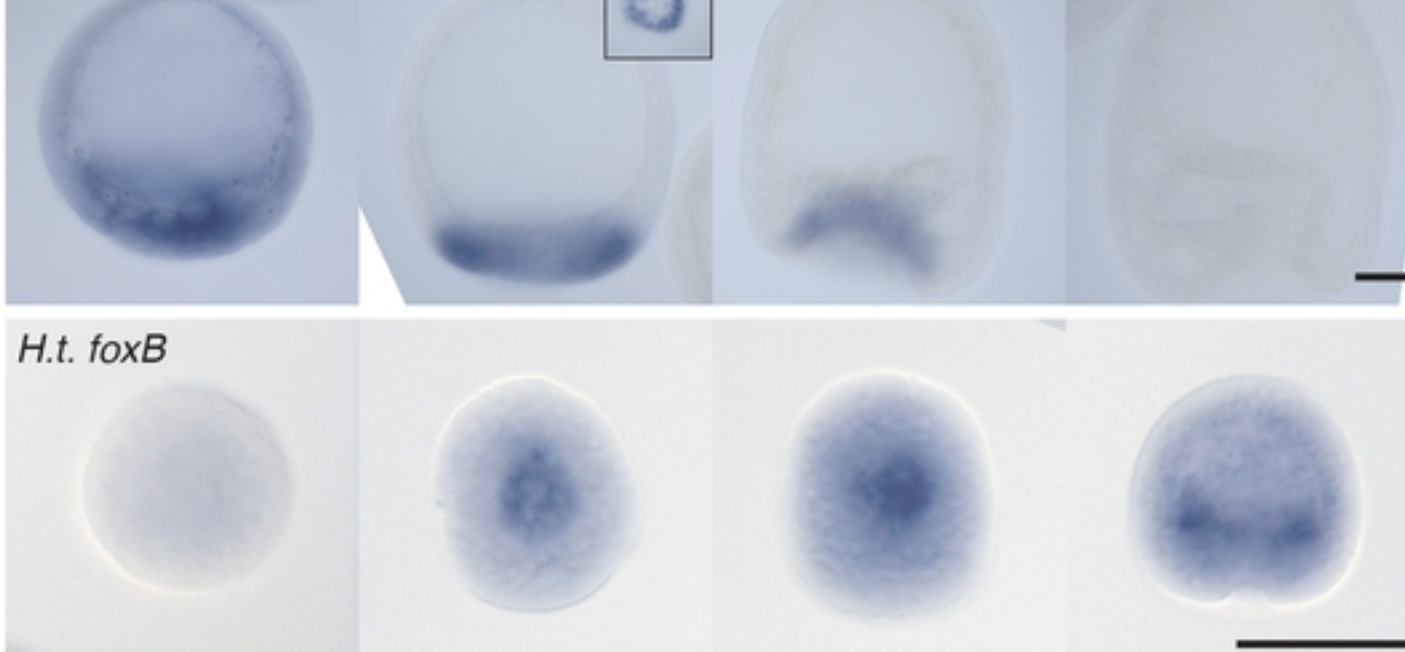

C

*H.t. foxB*

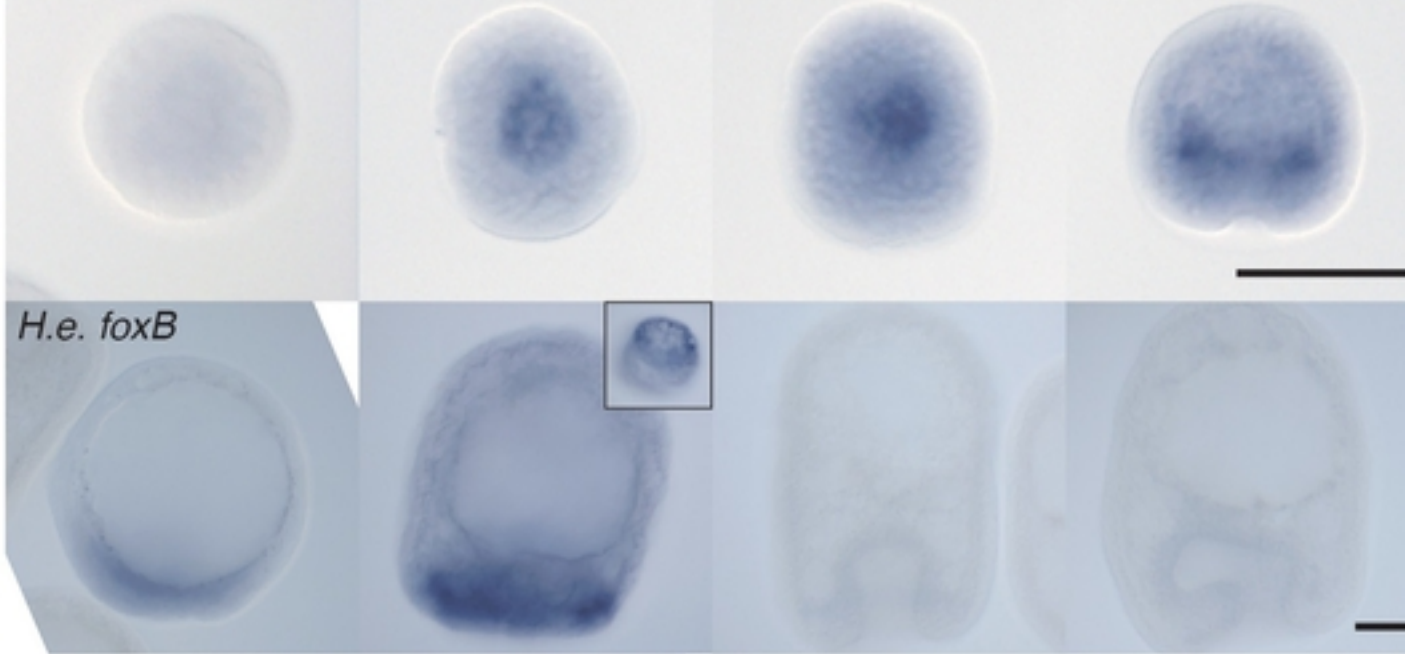

*H.e. foxB*

bioRxiv preprint doi: <https://doi.org/10.1101/712216>; this version posted July 23, 2019. The copyright holder for this preprint (which was not certified by peer review) is the author/funder, who has granted bioRxiv a license to display the preprint in perpetuity. It is made available under aCC-BY 4.0 International license.

Figure 4 SM-specific gene expression



Developmental Time

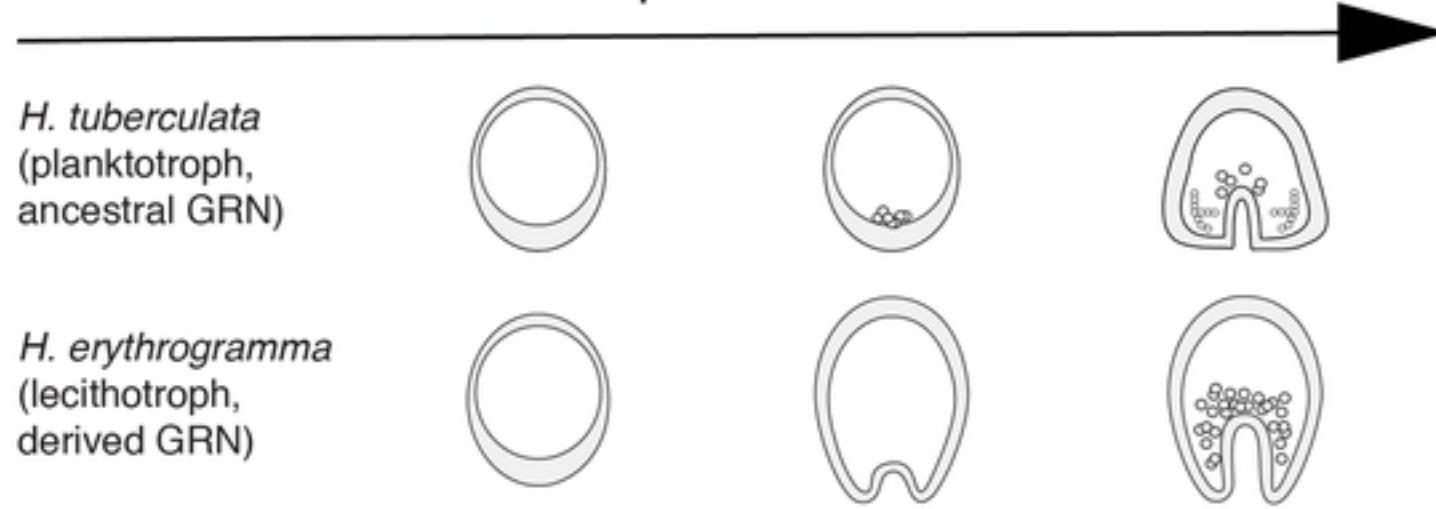

bioRxiv preprint doi: <https://doi.org/10.1101/712216>; this version posted July 23, 2019. The copyright holder for this preprint (which was not certified by peer review) is the author/funder, who has granted bioRxiv a license to display the preprint in perpetuity. It is made available under aCC-BY 4.0 International license.

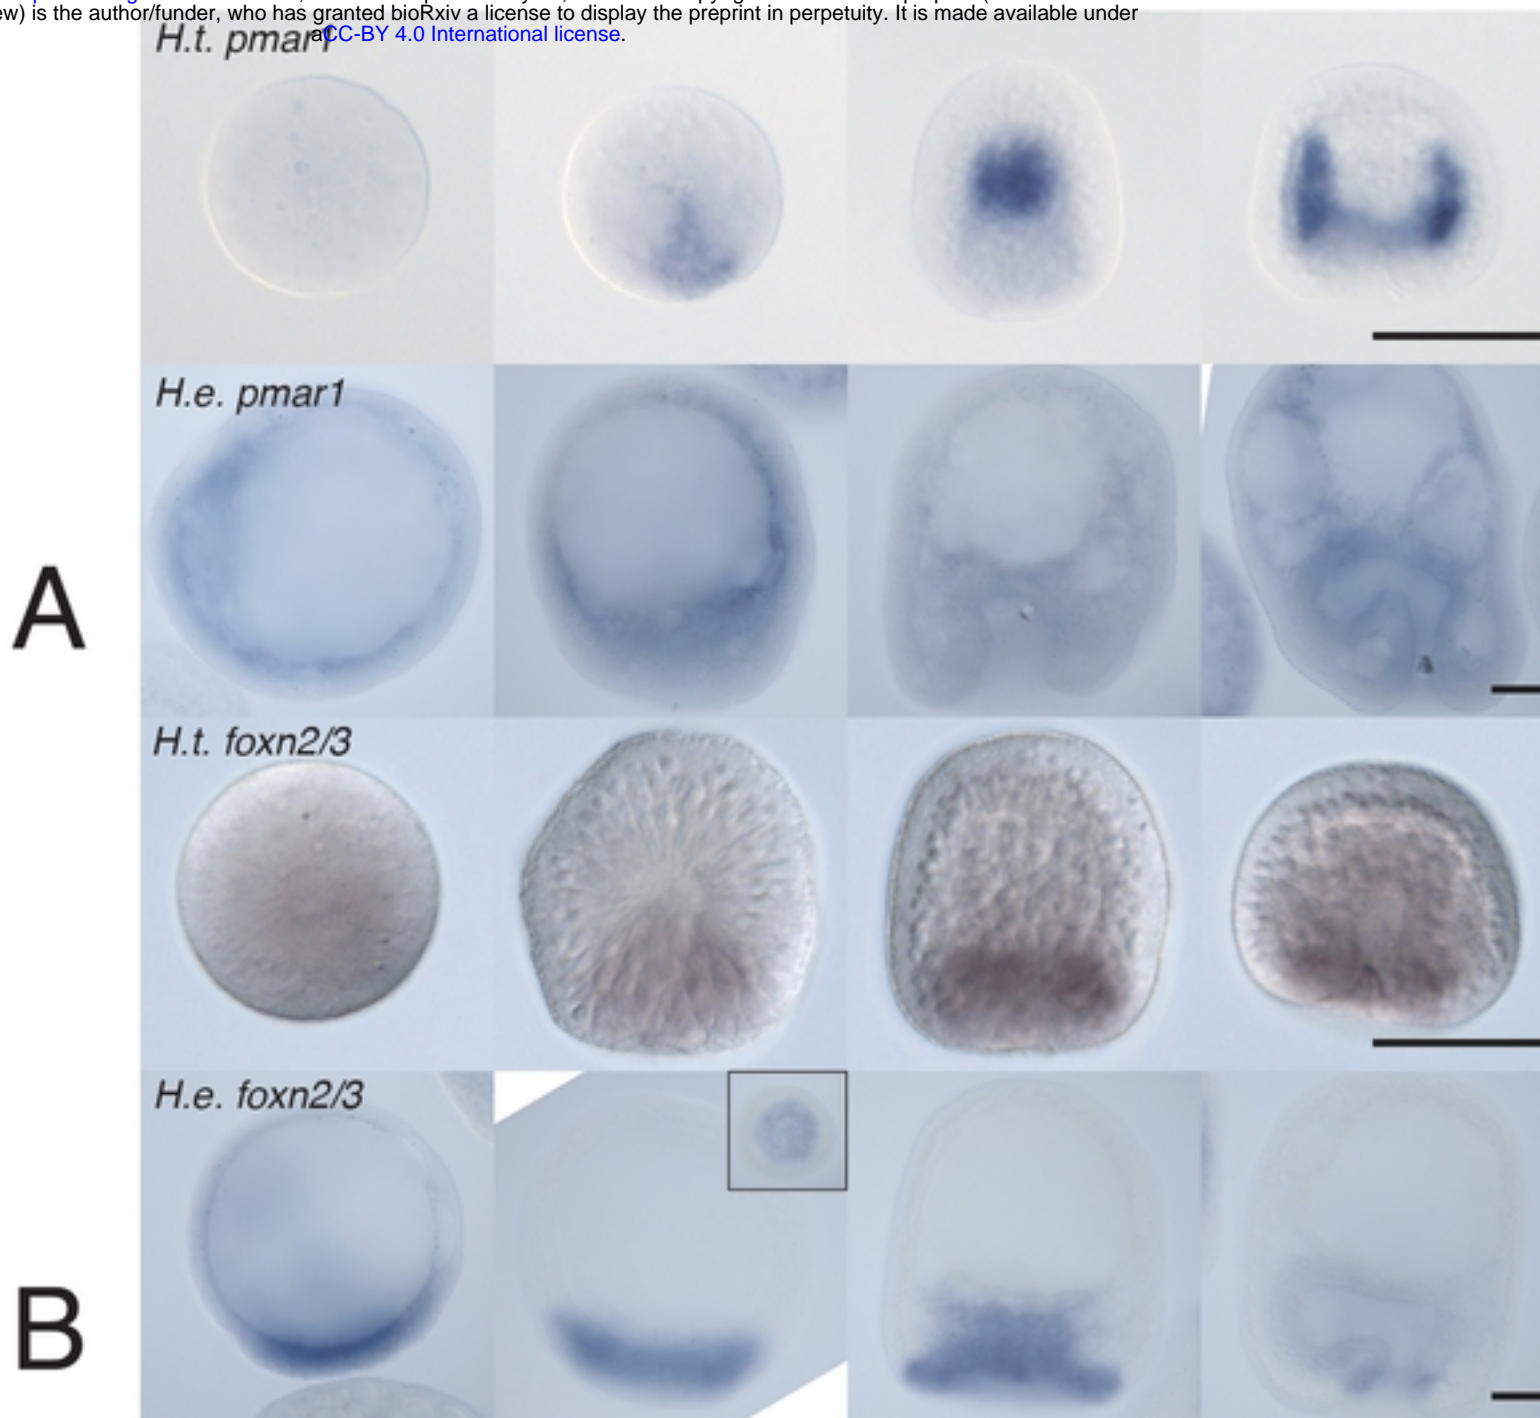

Figure 5 other SM gene expression

bioRxiv preprint doi: <https://doi.org/10.1101/712216>; this version posted July 23, 2019. The copyright holder for this preprint (which was not certified by peer review) is the author/funder, who has granted bioRxiv a license to display the preprint in perpetuity. It is made available under aCC-BY 4.0 International license.

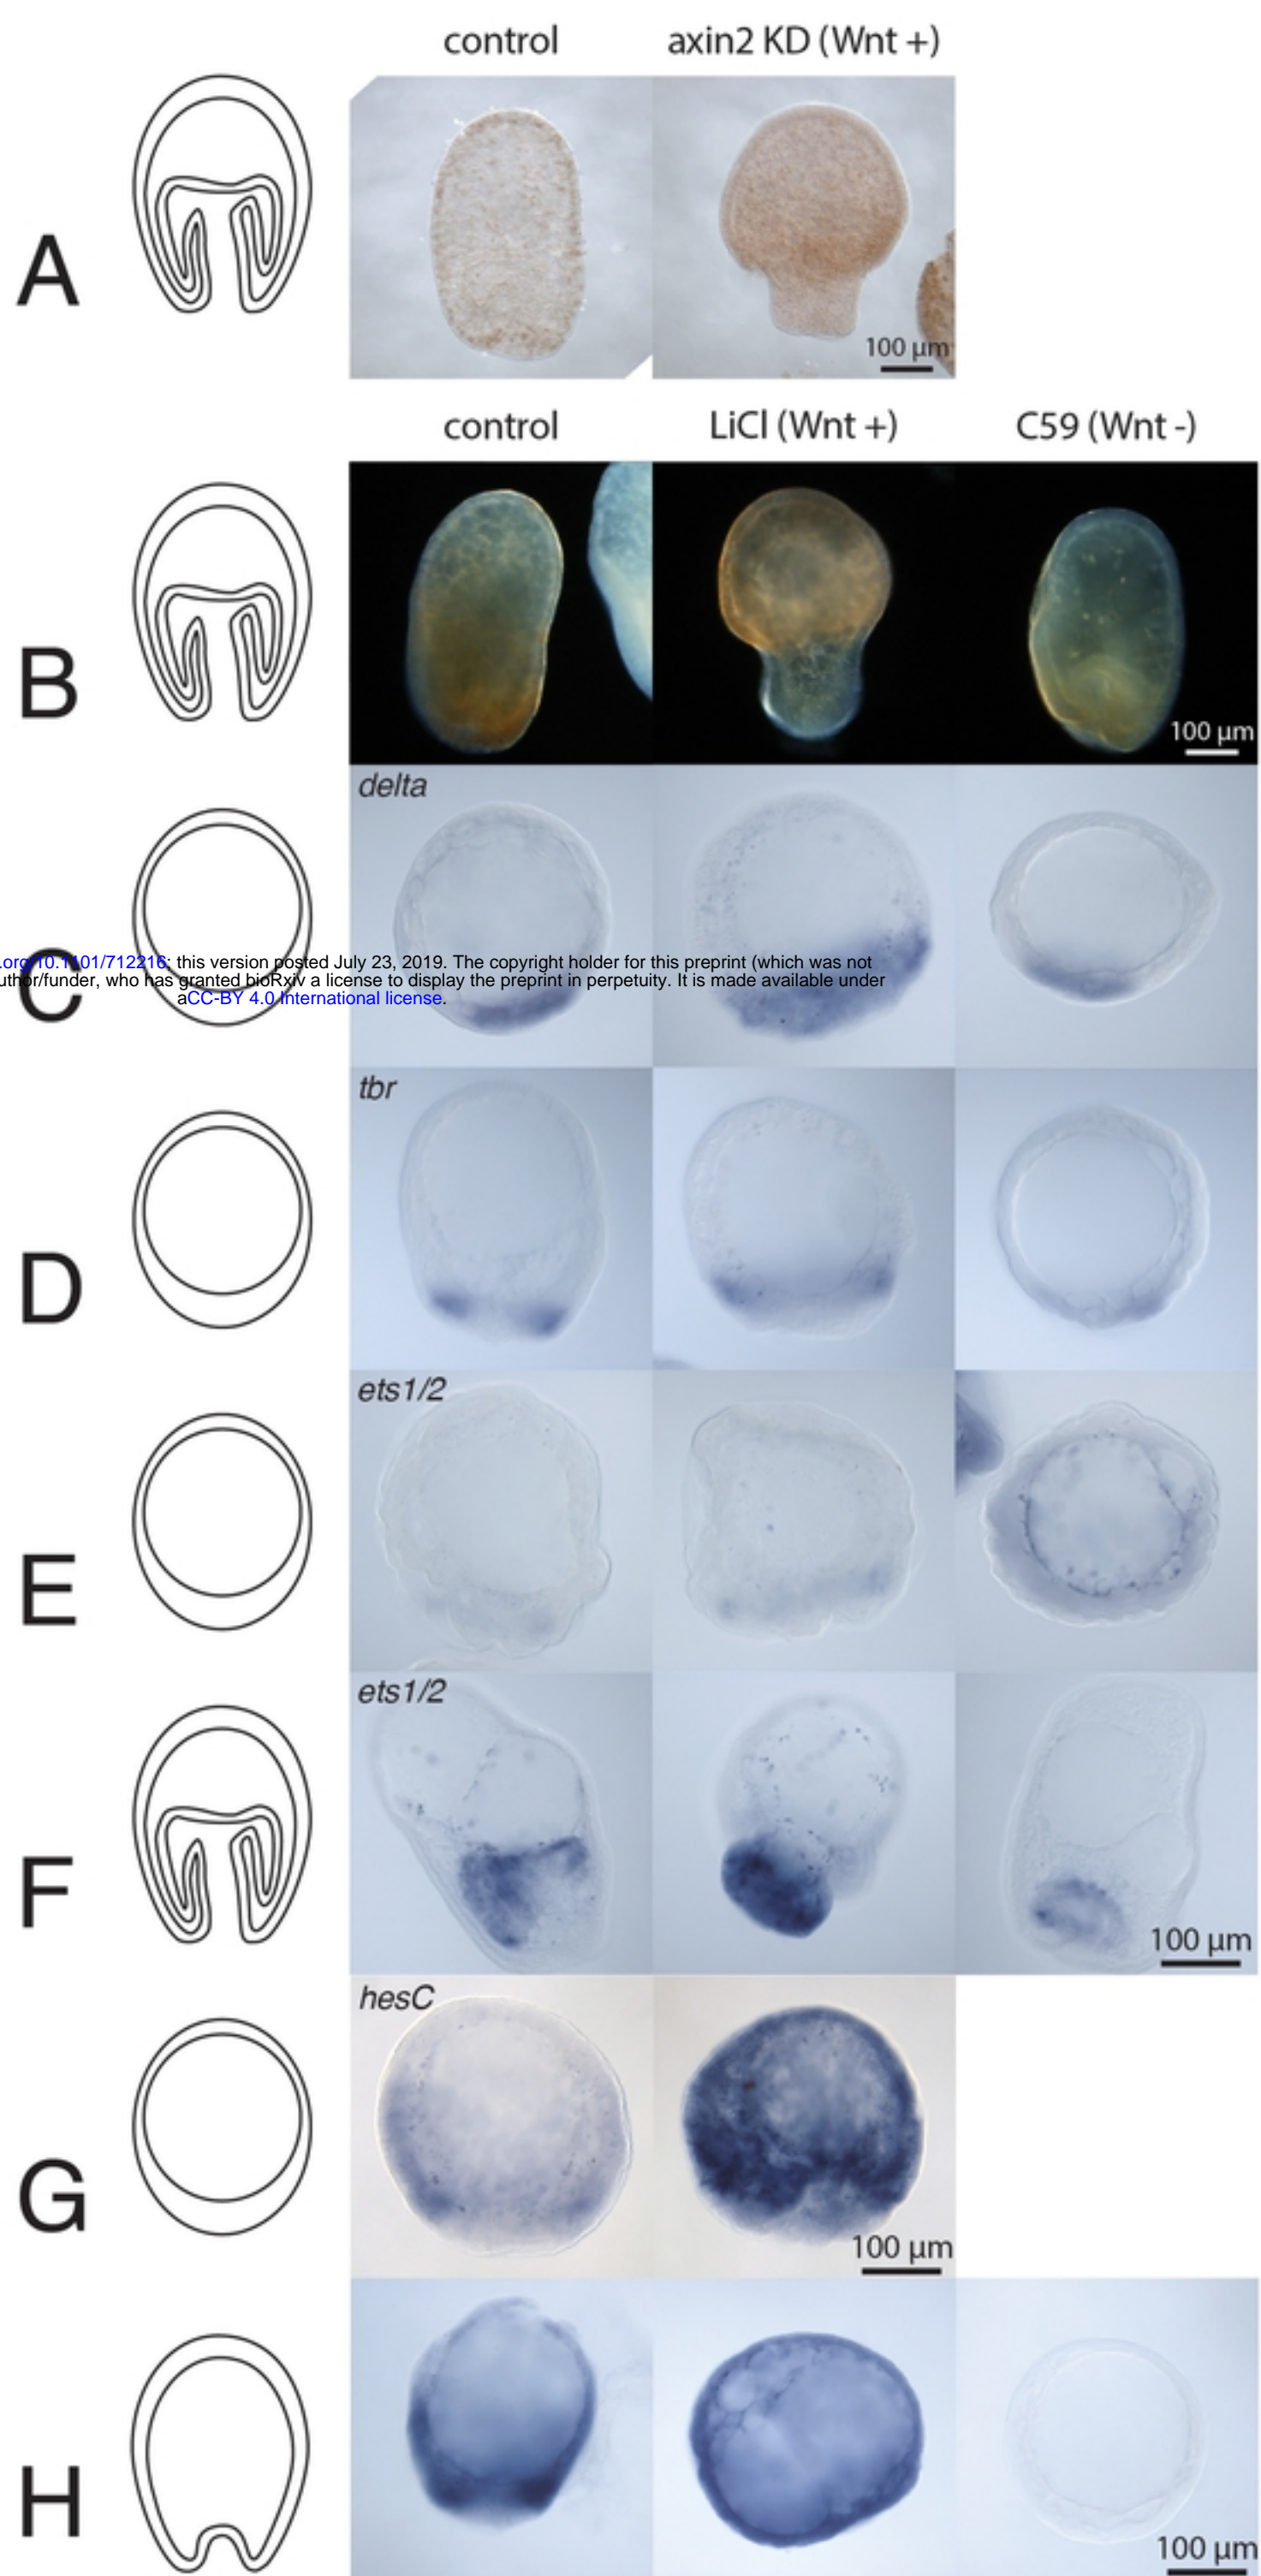

Figure 6 Wnt signaling



bioRxiv preprint doi: <https://doi.org/10.1101/712216>; this version posted July 23, 2020. The copyright holder for this preprint (which was not certified by peer review) is the author/funder, who has granted bioRxiv a license to display the preprint in perpetuity. It is made available under aCC-BY 4.0 International license.

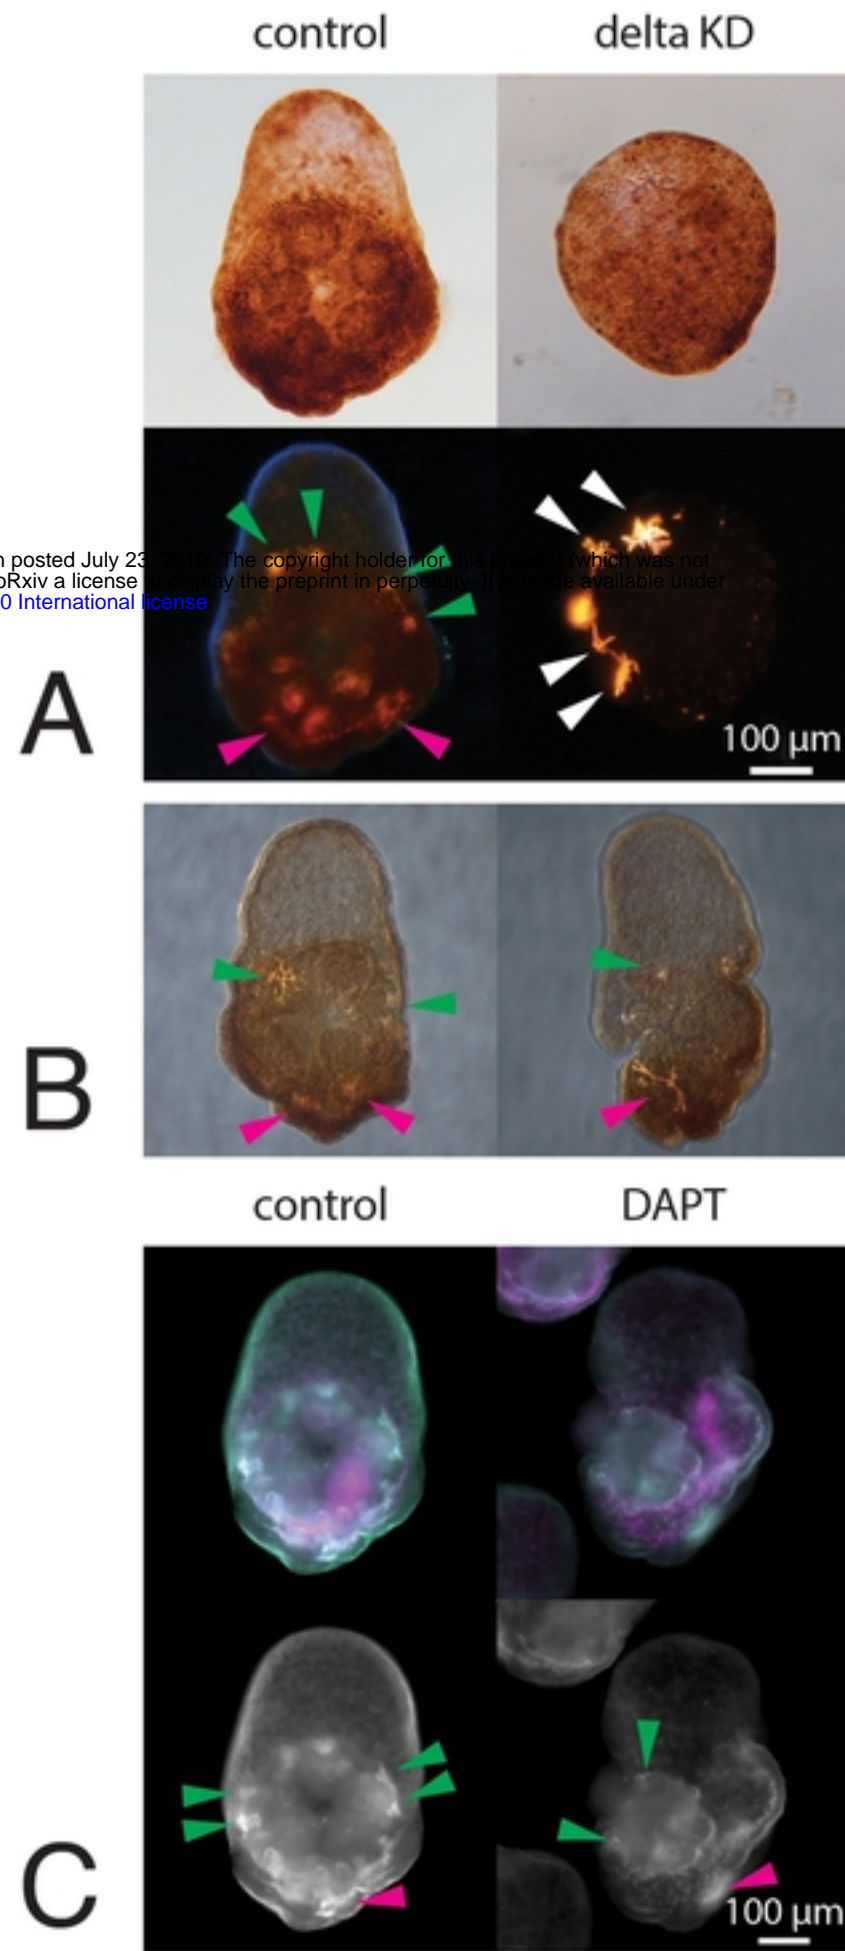

Figure 7 Delta phenotypes

bioRxiv preprint doi: <https://doi.org/10.1101/712216>; this version posted July 23, 2019. The copyright holder for this preprint (which was not certified by peer review) is the author/funder, who has granted bioRxiv a license to display the preprint in perpetuity. It is made available under aCC-BY 4.0 International license.

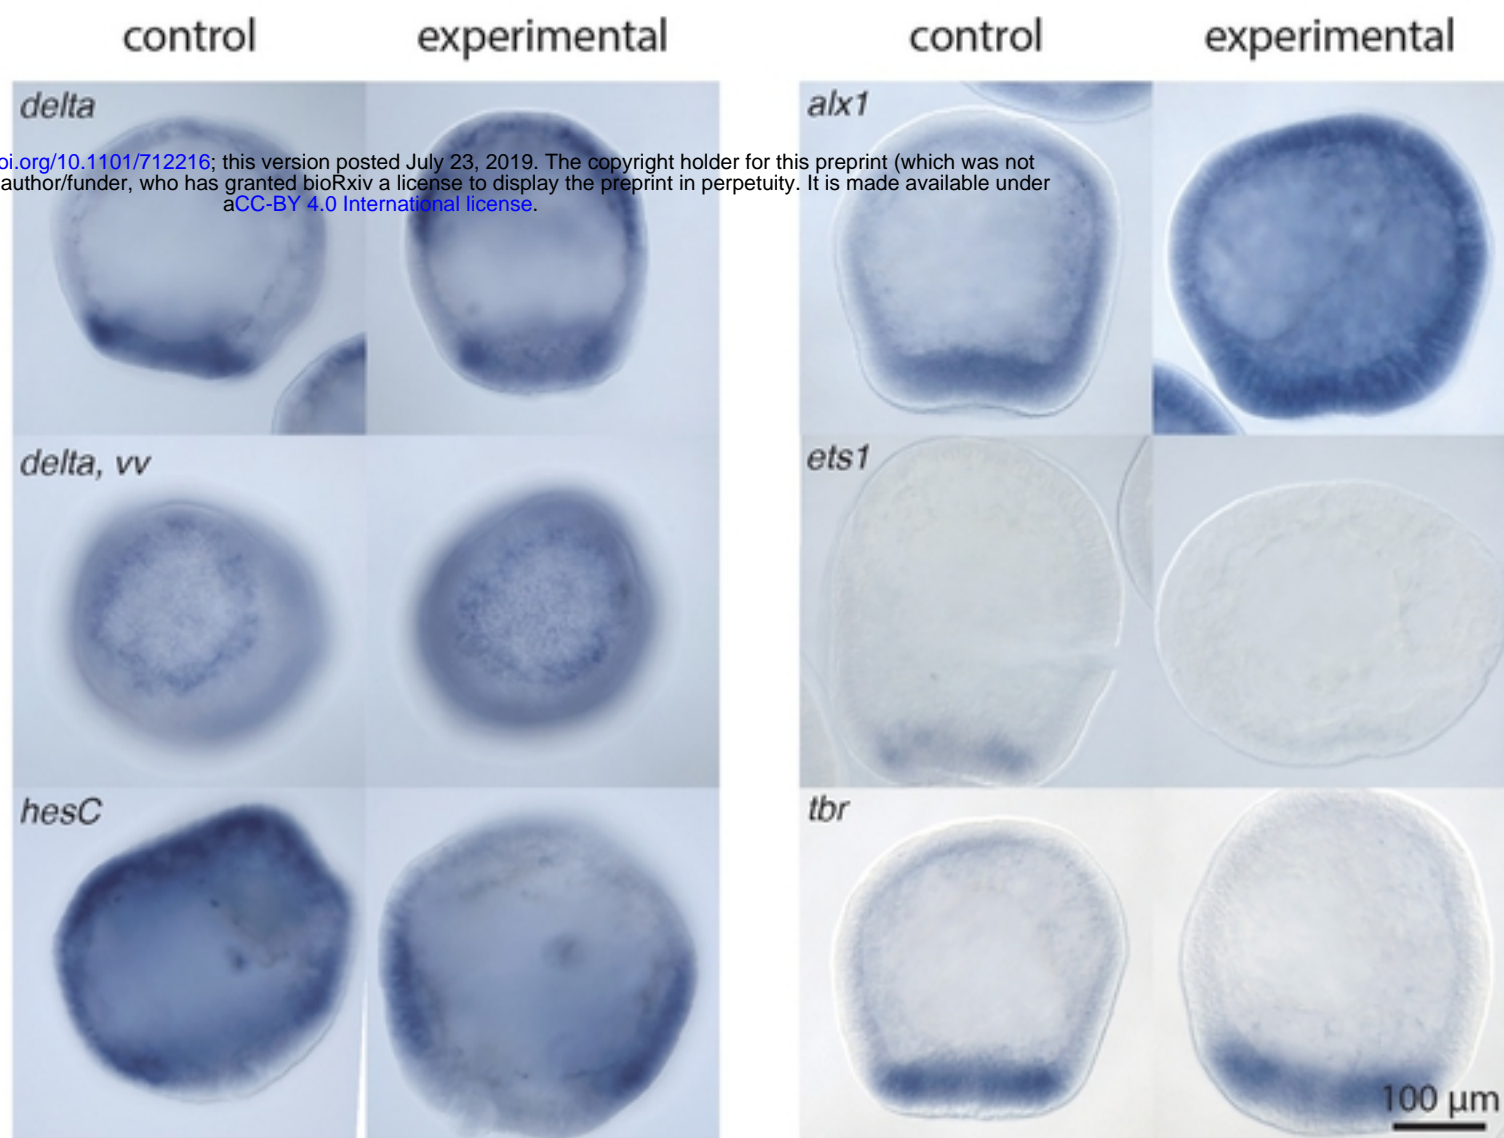

Figure 8 Delta GRN outputs at HB



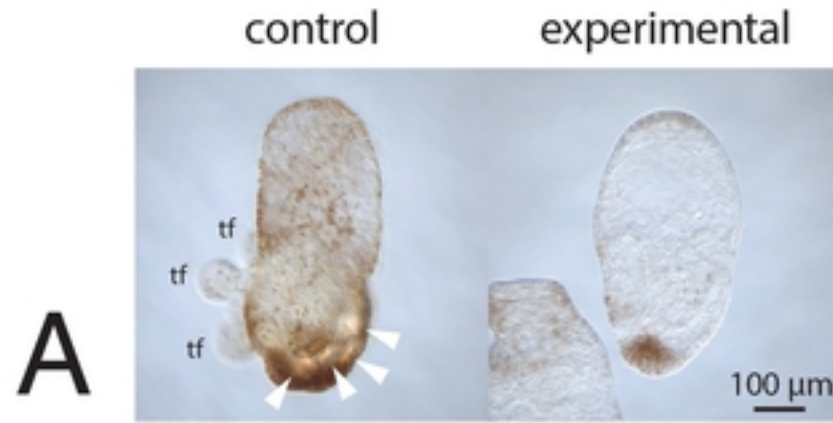

bioRxiv preprint doi: <https://doi.org/10.1101/712216>; this version posted July 23, 2019. The copyright holder for this preprint (which was not certified by peer review) is the author/funder, who has granted bioRxiv a license to display the preprint in perpetuity. It is made available under aCC-BY 4.0 International license.

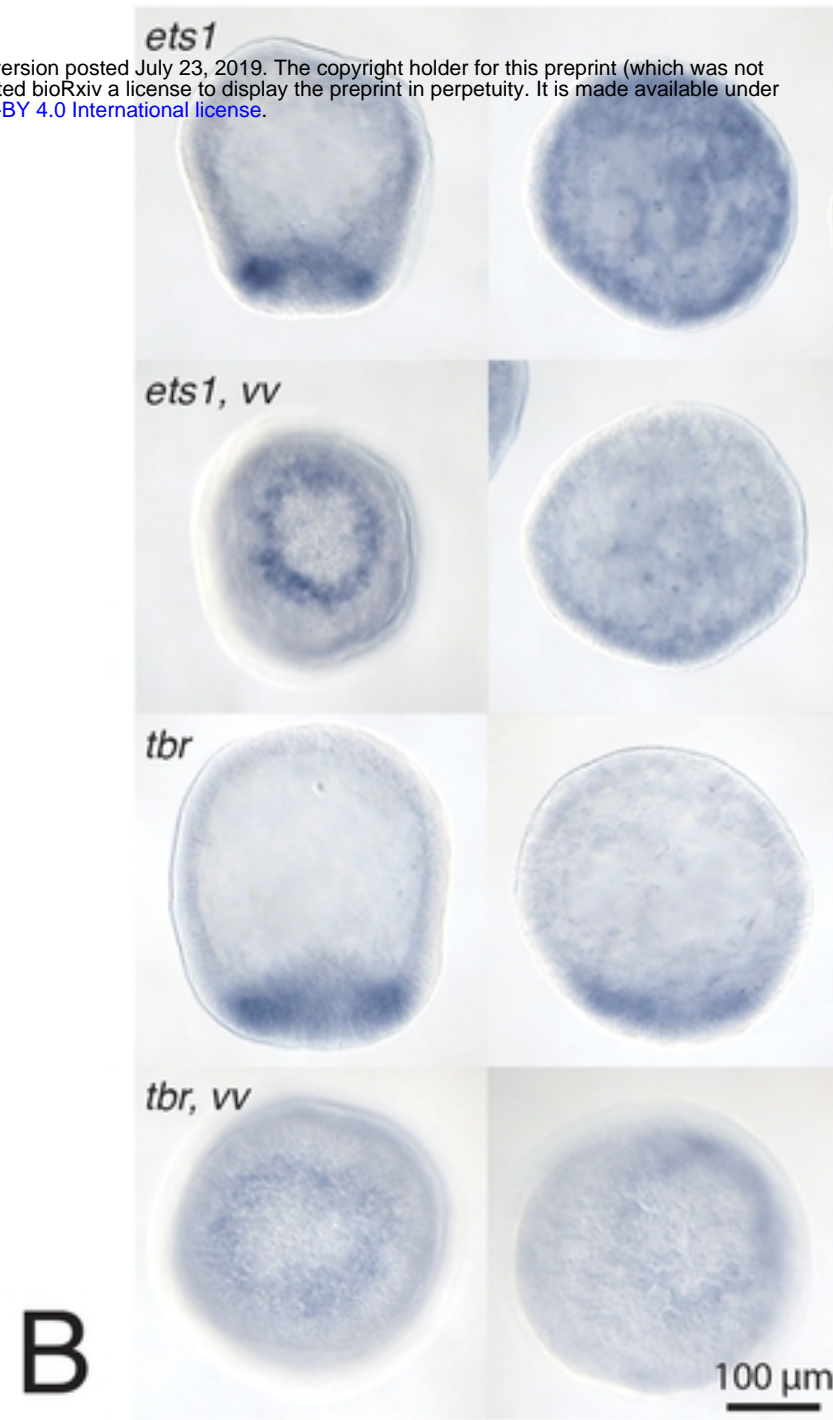

Figure 9 MEK-ERK

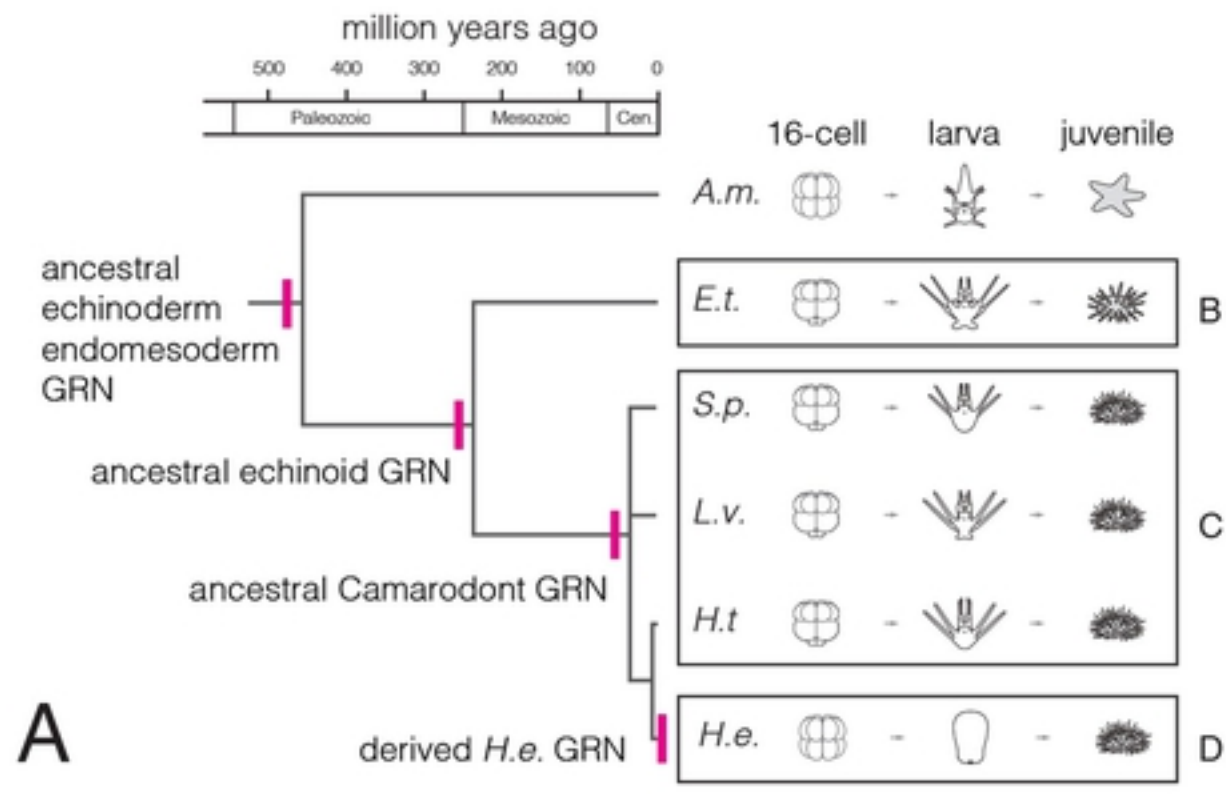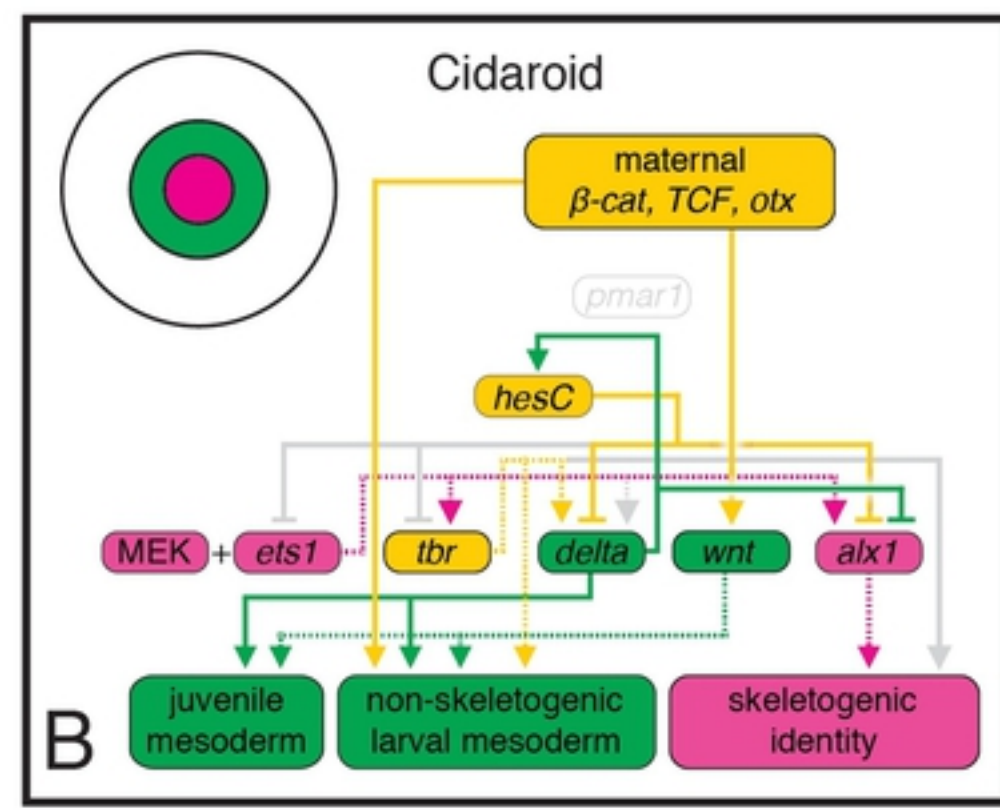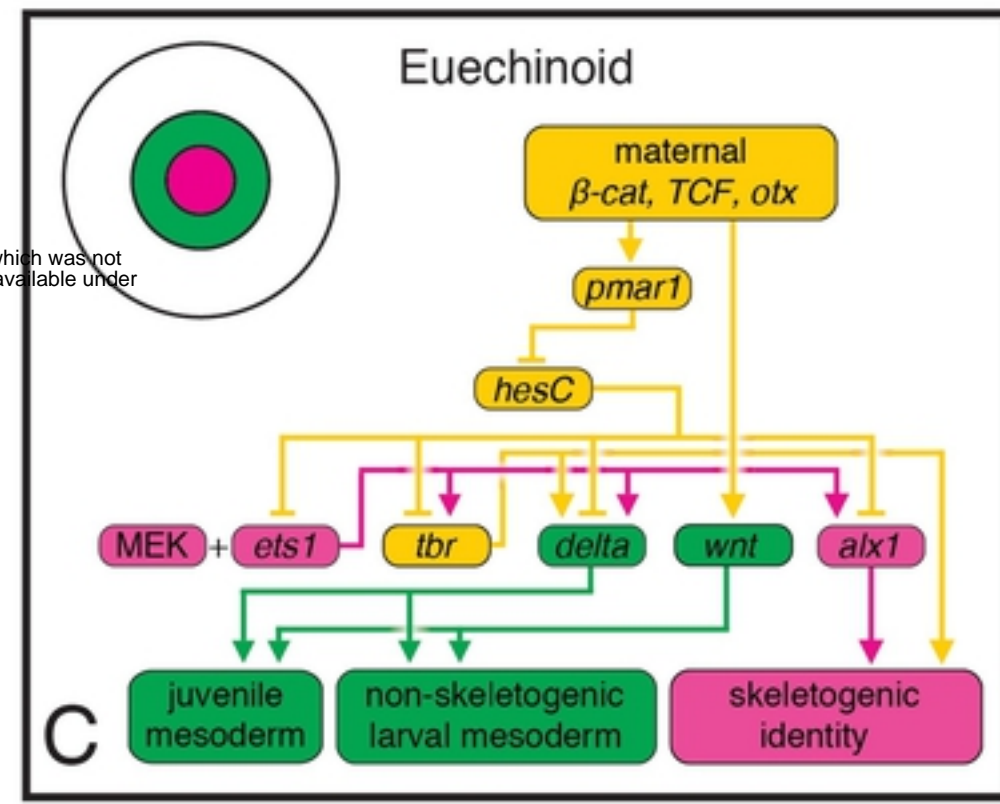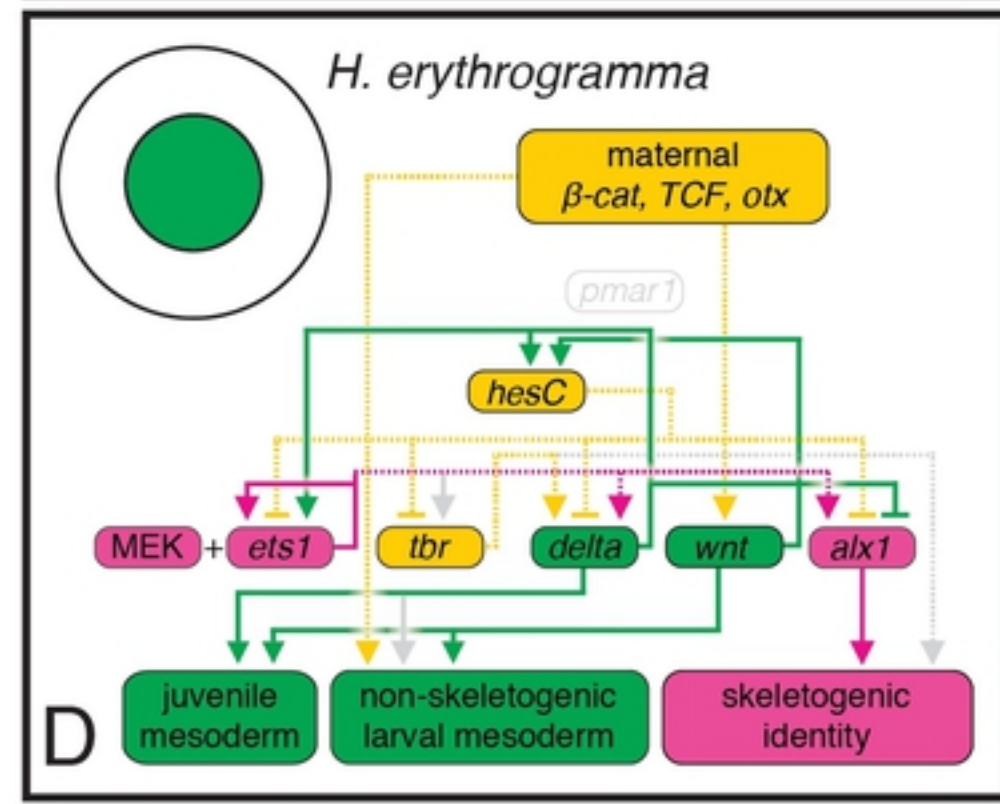

bioRxiv preprint doi: <https://doi.org/10.1101/712216>; this version posted July 23, 2019. The copyright holder for this preprint (which was not certified by peer review) is the author/funder, who has granted bioRxiv a license to display the preprint in perpetuity. It is made available under aCC-BY 4.0 International license.

Figure 10 GRN summary

bioRxiv preprint doi: <https://doi.org/10.1101/712216>; this version posted July 23, 2019. The copyright holder for this preprint (which was not certified by peer review) is the author/funder, who has granted bioRxiv a license to display the preprint in perpetuity. It is made available under aCC-BY 4.0 International license.

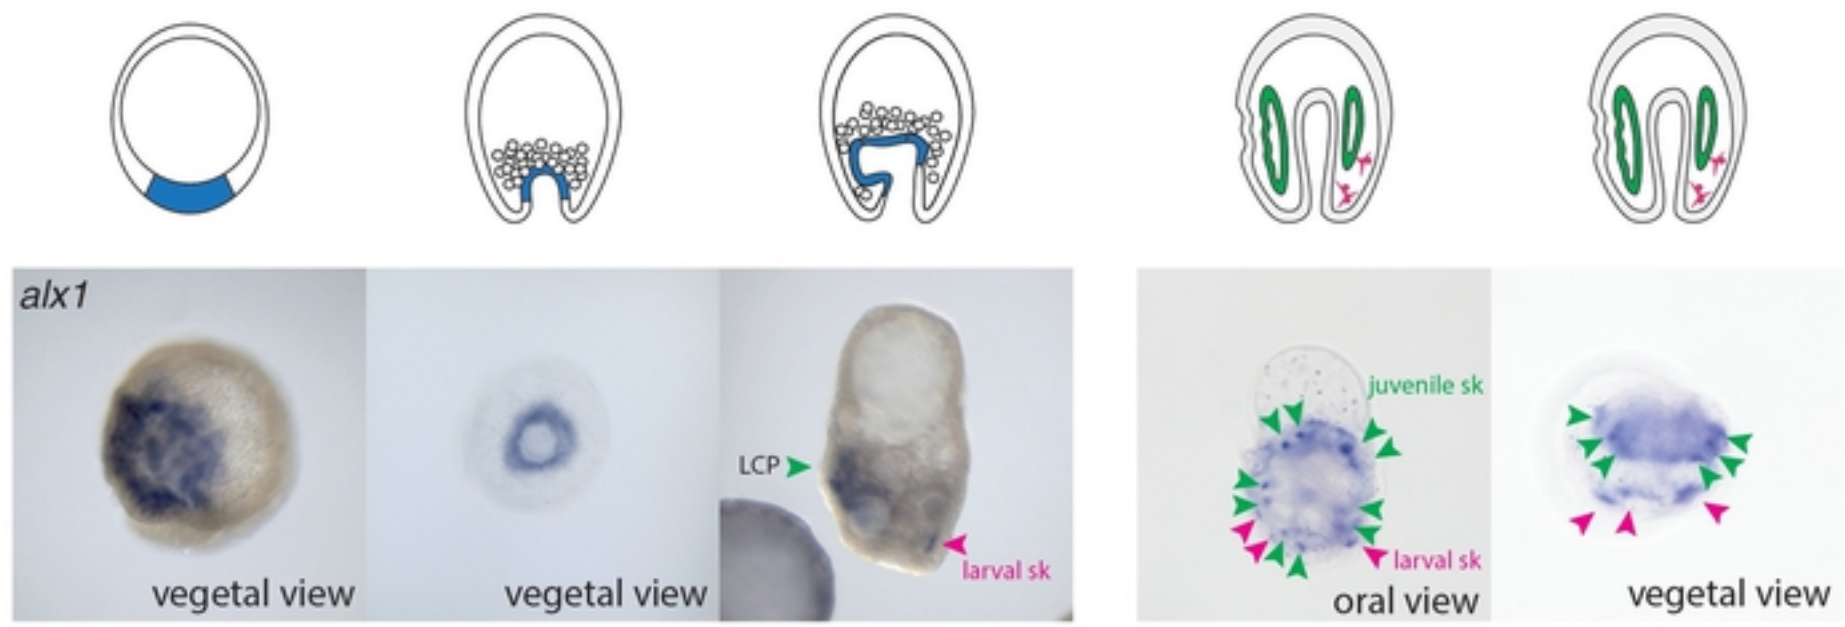

Supplemental Figure 1 Alx1 alternate views



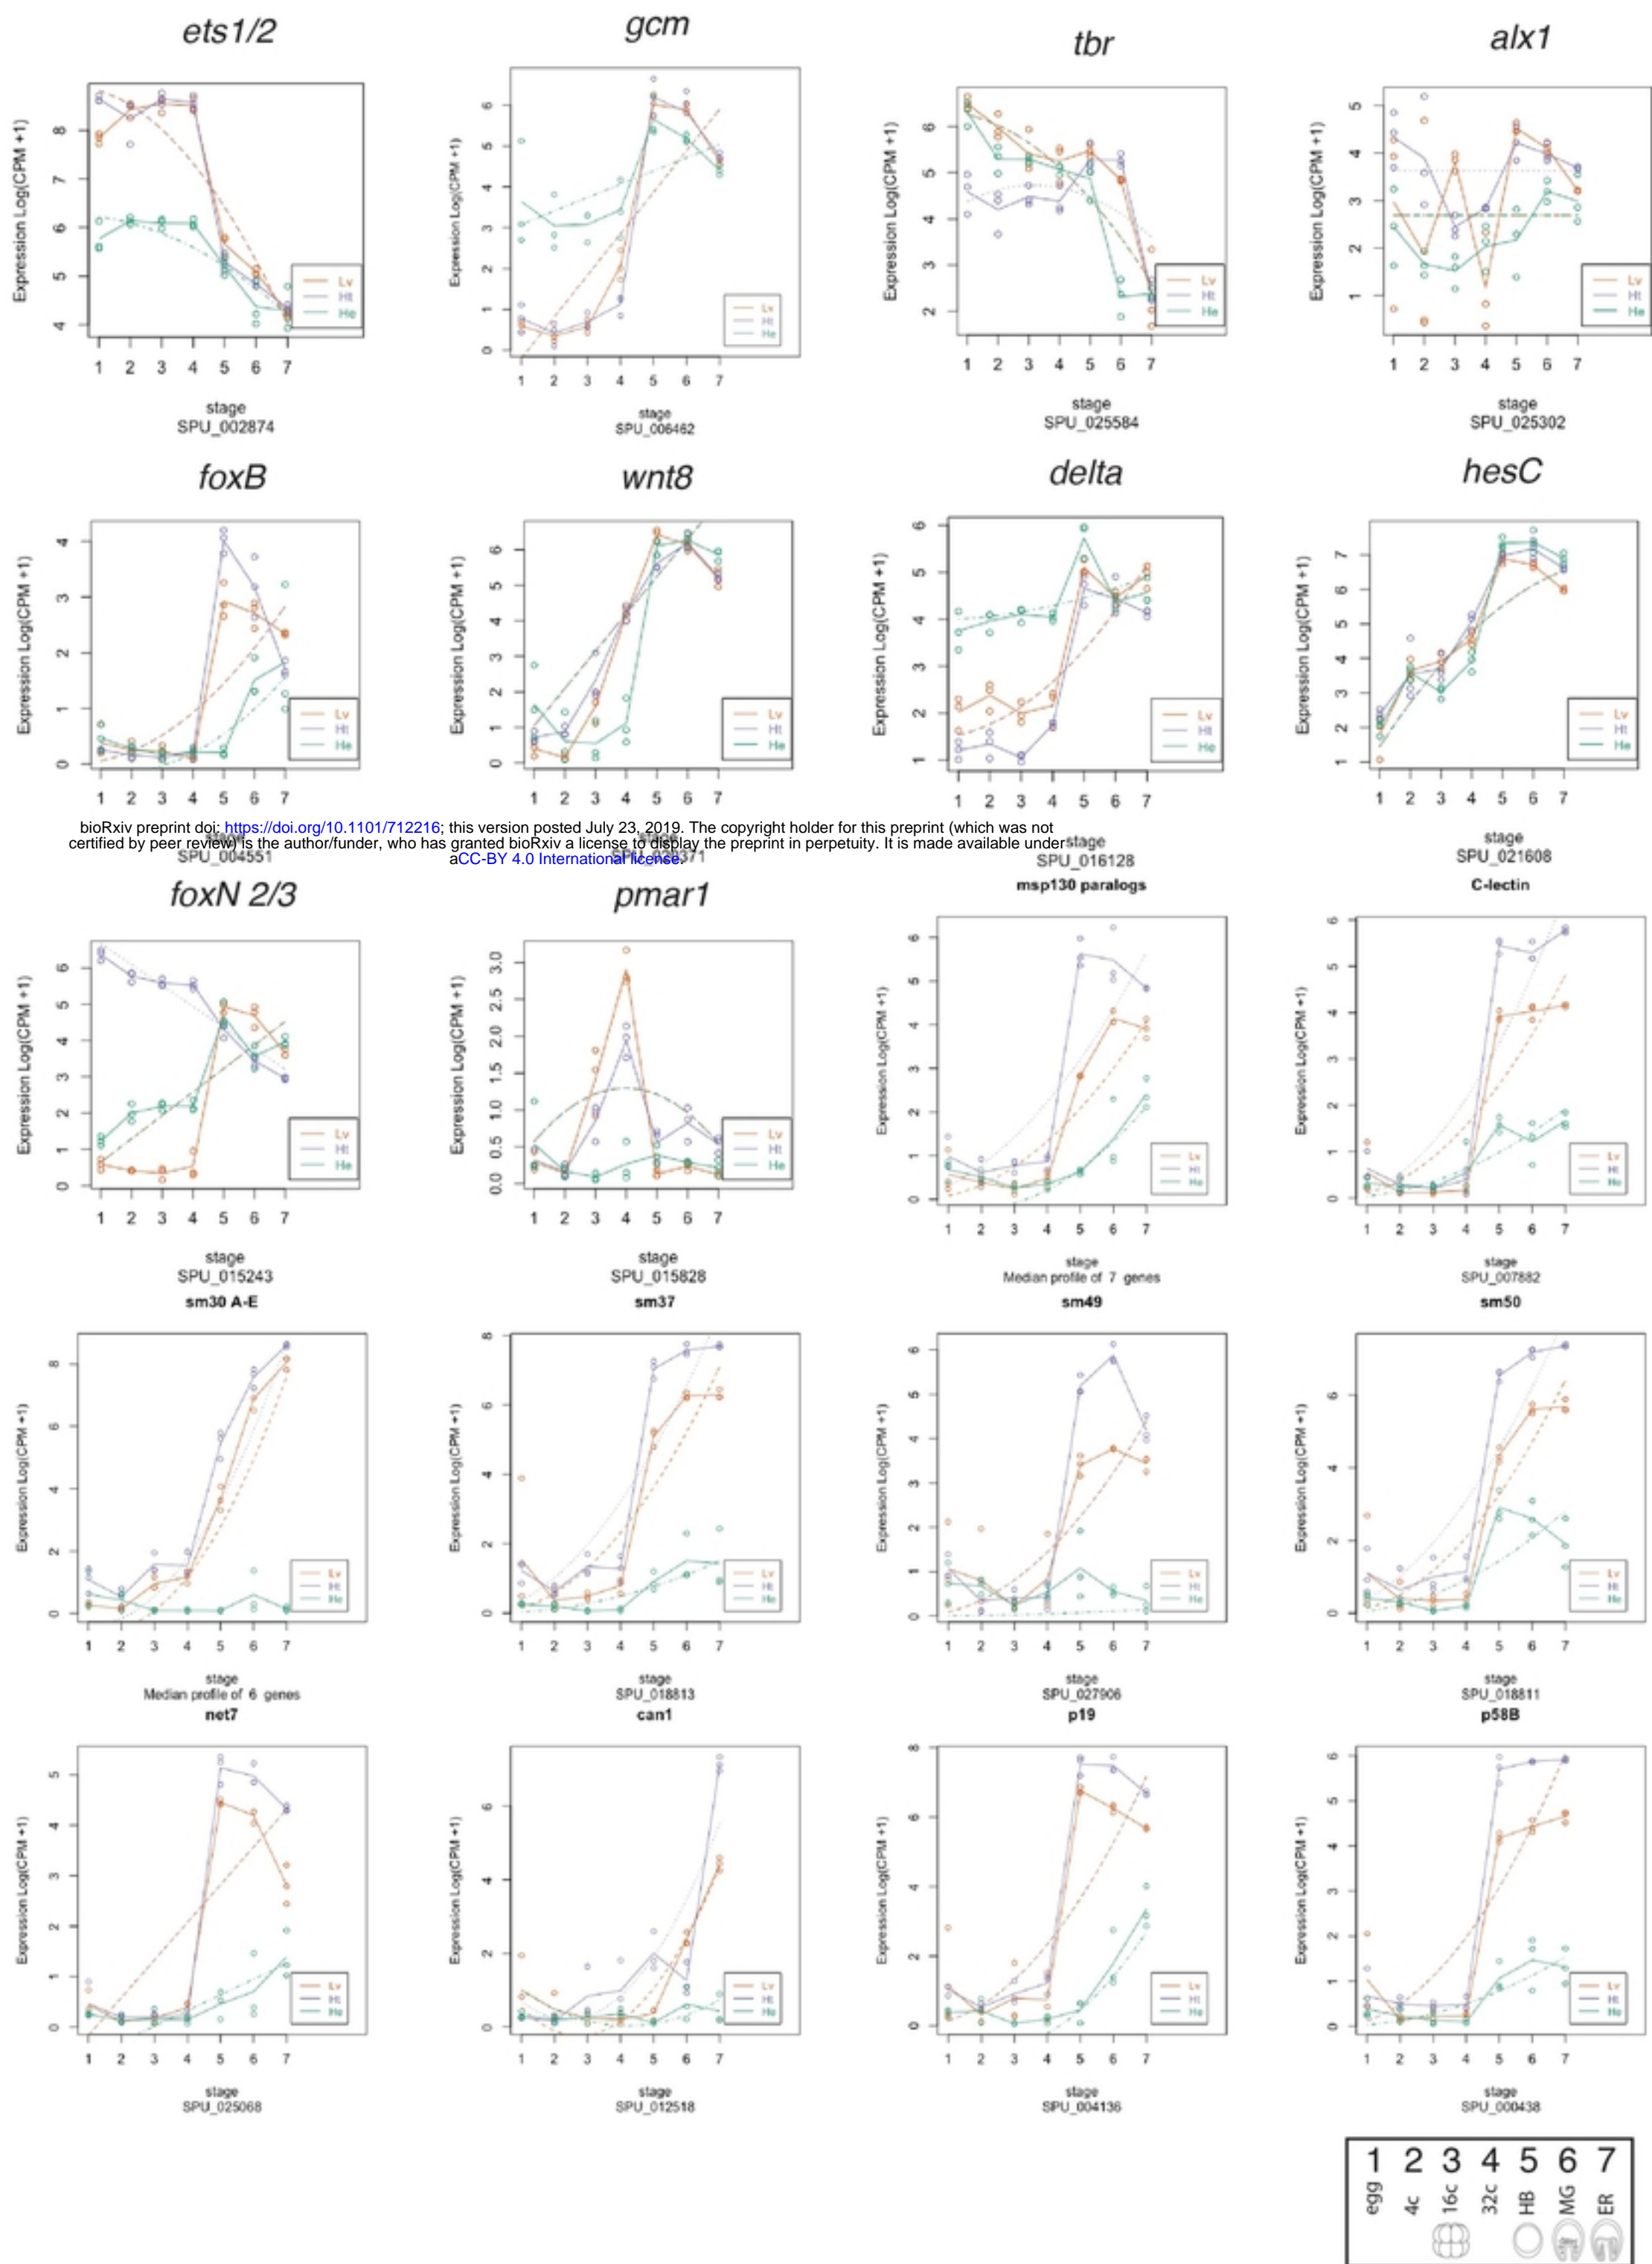

Supplemental Figure 2 selected gene expression profiles

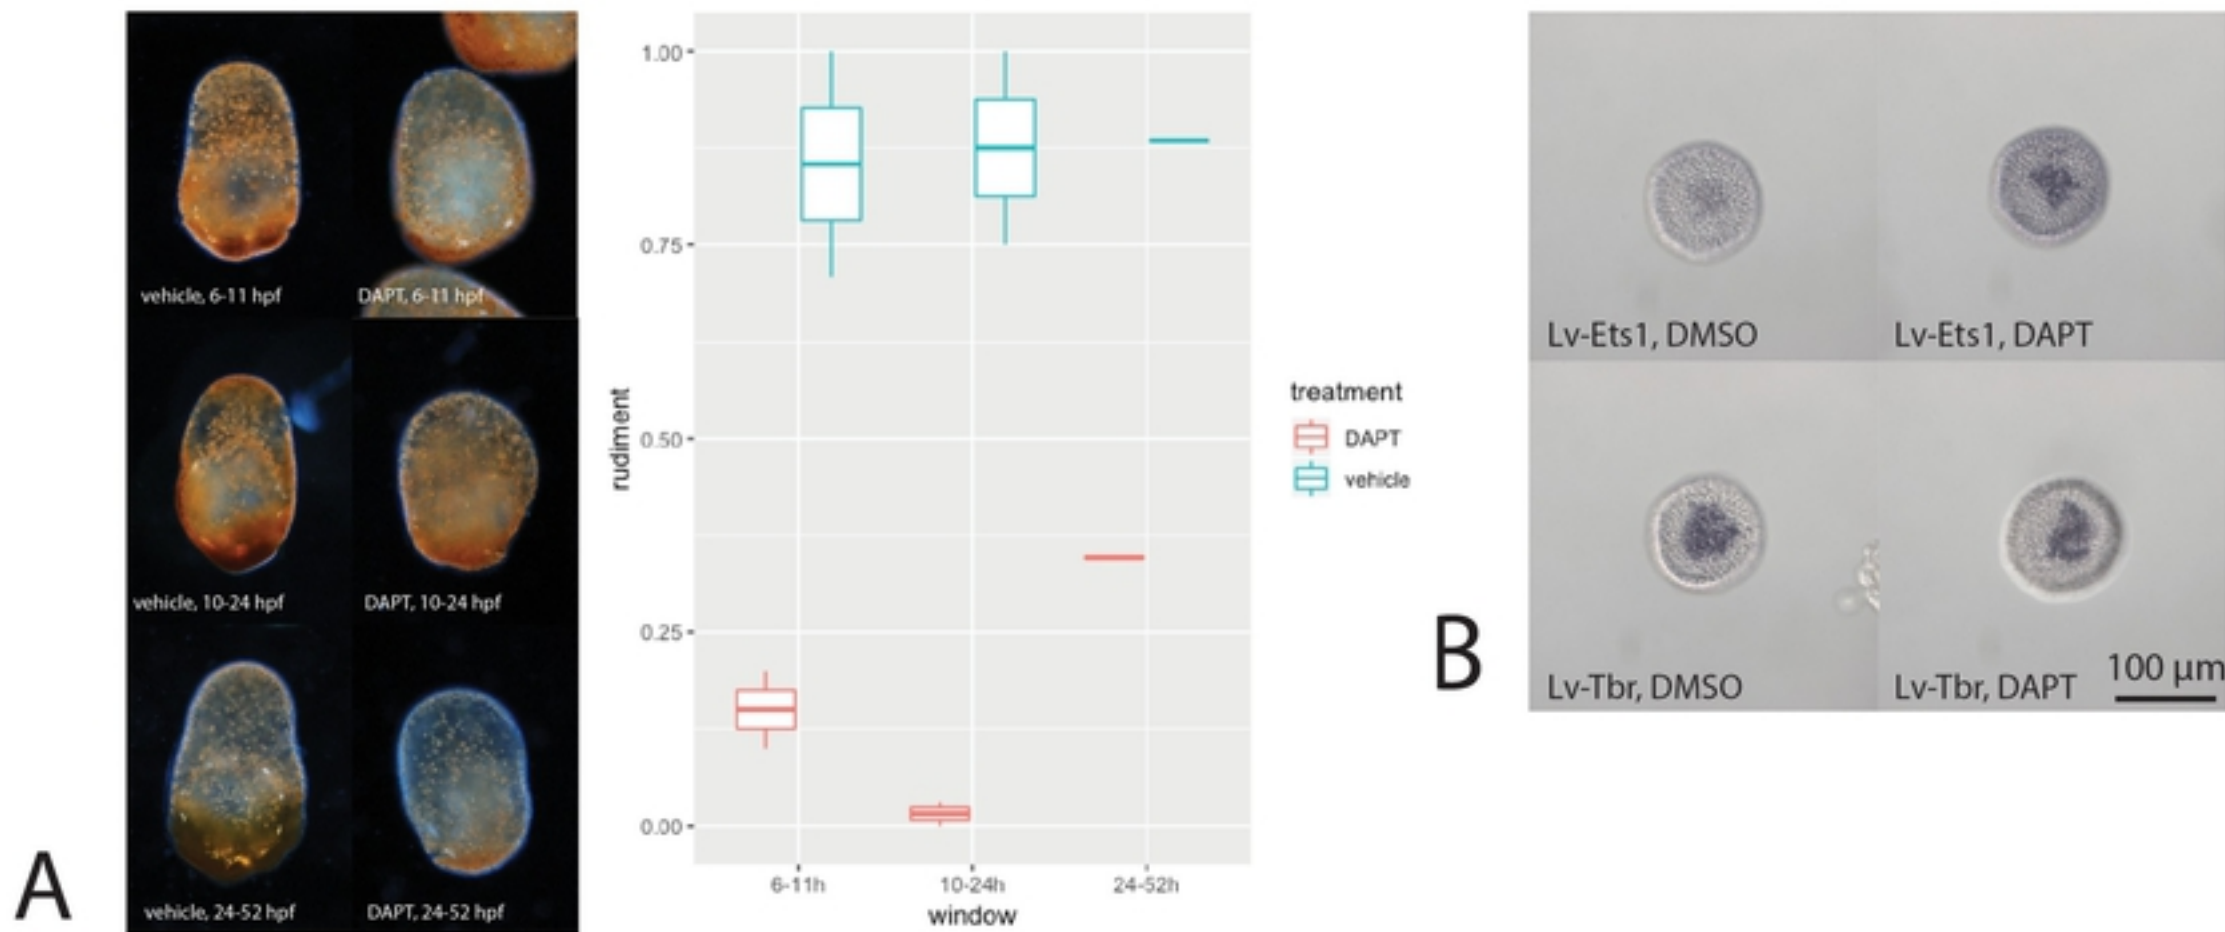

bioRxiv preprint doi: <https://doi.org/10.1101/712216>; this version posted July 23, 2019. The copyright holder for this preprint (which was not certified by peer review) is the author/funder, who has granted bioRxiv a license to display the preprint in perpetuity. It is made available under aCC-BY 4.0 International license.

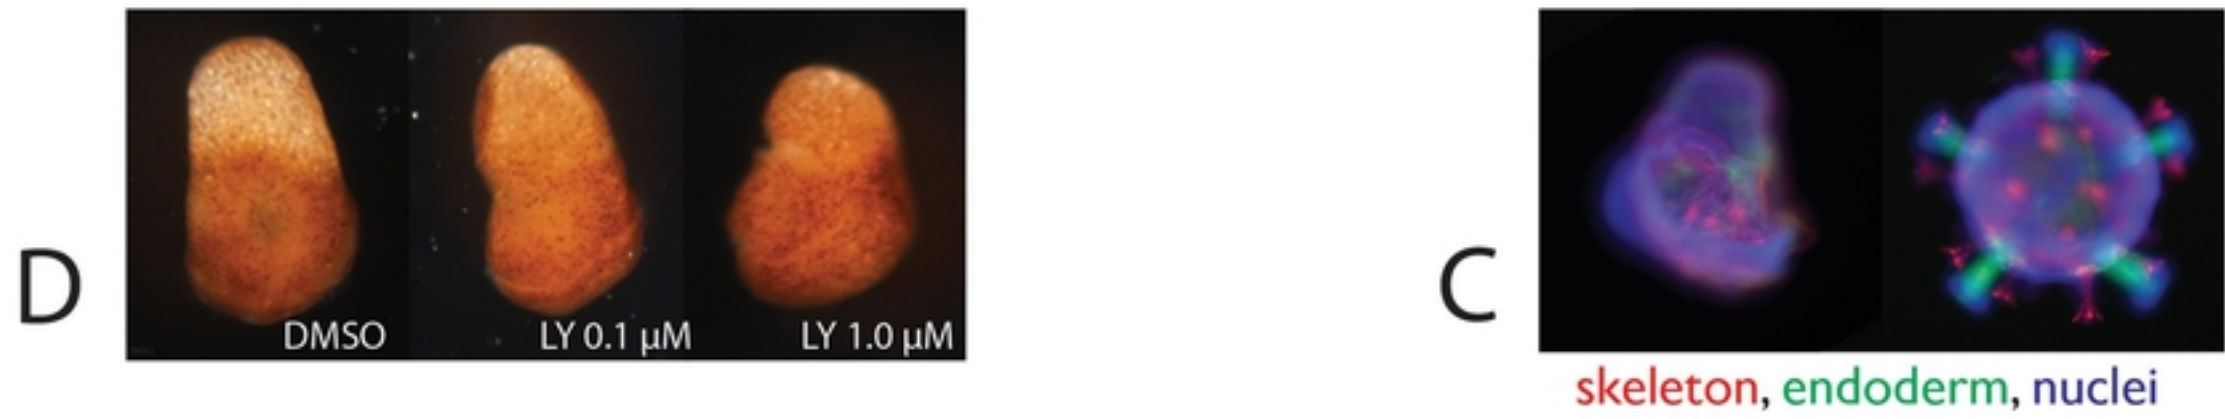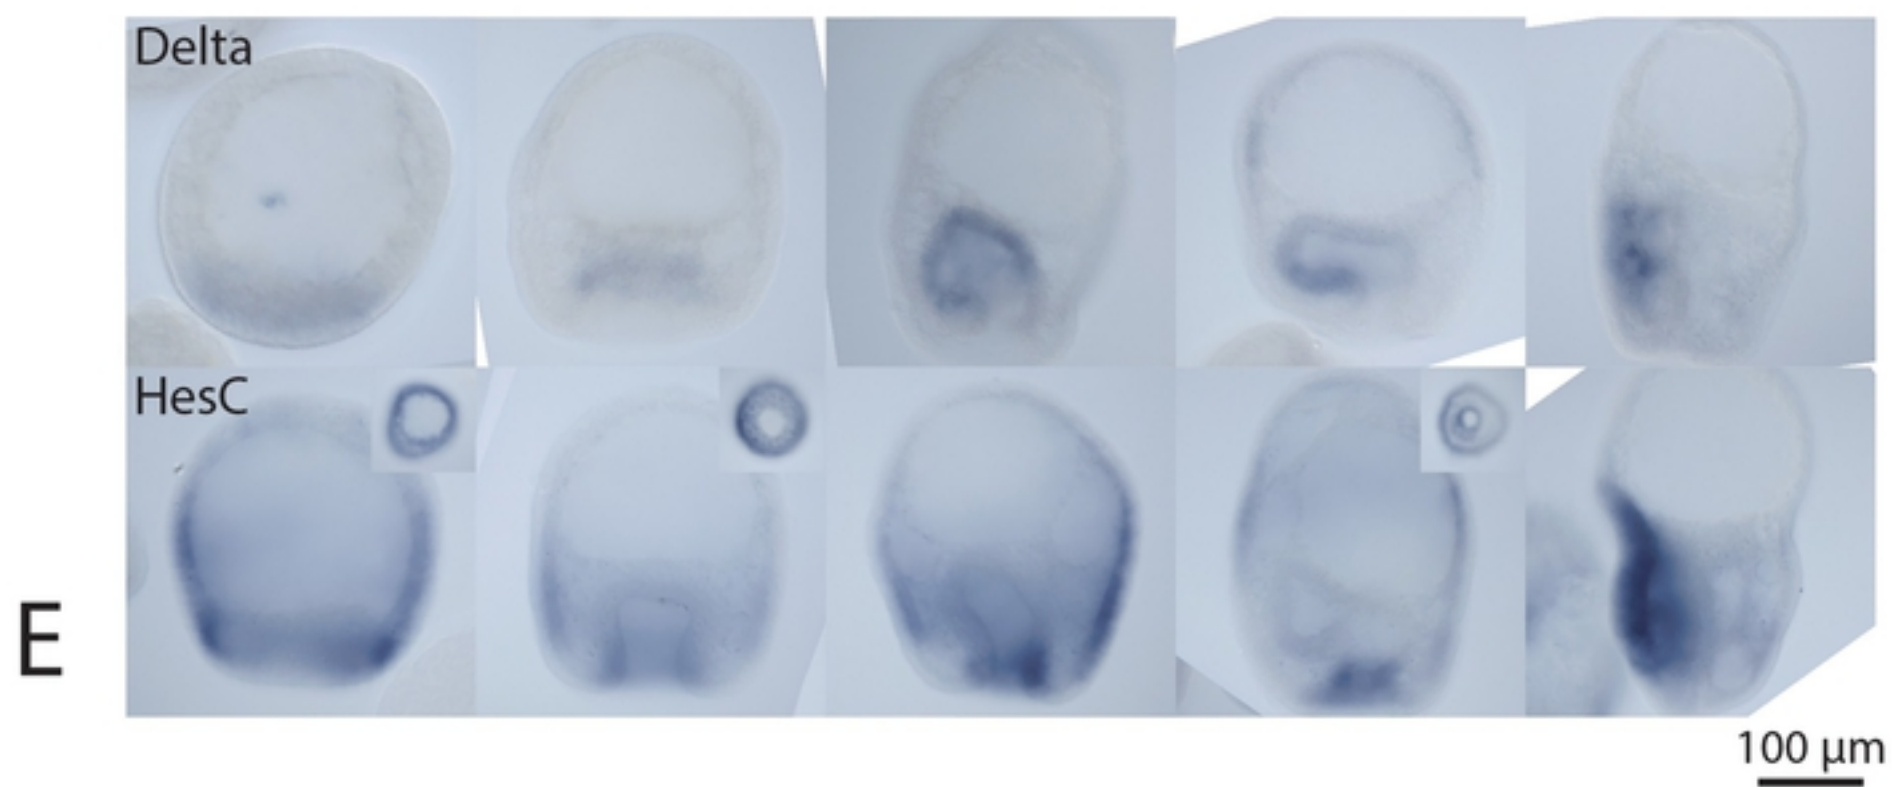

Supplemental Figure 3 Additional Delta experiments
